# Supplementary material for: Symmetry-guided monomer design enables the combinatorial synthesis and targeted screening of polyesters
Source: Royal Society of Chemistry journal article supplement (doi:10.1039/d5sc07720f), 2025-12-15
Supplement: d5sc07720f1.xlsx [file d5sc07720f1.xlsx]

## Sheet: Contents
								Name	Note
								Sheet S1	Designed diacids
								Sheet S2	Designed diols
								Sheet S3	Molecular dynamics simulation results
								Sheet S4	Experimental results

## Sheet: Sheet S1
Name	SMILES
A1	*C(=O)CC(=CC(=C)C)CC(=O)O[H]
A2	*C(=O)CC(=C=C(C)CC(=O)O[H])C
A3	*C(=O)CC(=C=C(C)C)CC(=O)O[H]
A4	*C(=O)CC(n1nncn1)CC(=O)O[H]
A5	*C(=O)c1ccc(C(NC(c2ccc(C(=O)O[H])cc2)C)C)cc1
A6	*C(=O)c1cccc(C(NC(c2cccc(C(=O)O[H])c2)C)C)c1
A7	*C(=O)c1ccccc1C(NC(c1ccccc1C(=O)O[H])C)C
A8	*C(=O)CC(c1ccccc1)NC(c1ccccc1)CC(=O)O[H]
A9	*C(=O)c1cc(OCC)cc(C(=O)O[H])c1
A10	*C(=O)c1cccc(C(=O)O[H])c1OCC
A11	*C(=O)CCCC1=C(CCCC(=O)O[H])CCCC1
A12	*C(=O)C(C)CC1=C(CC(C(=O)O[H])C)CCCC1
A13	*C(=O)C(C1=C(C(C(=O)O[H])CC)CCCC1)CC
A14	*C(=O)C1C(CCC)=C(CCC)C(C(=O)O[H])CC1
A15	*C(=O)CC(CC(=O)O[H])C(C)C(C)(C)C(C)(C)C
A16	*C(=O)CC(C)(CC(=O)O[H])C(C)(C)C(C)C(C)C
A17	*C(=O)CC(CC(=O)O[H])(C(C)C(C)C)C(C)(C)C
A18	*C(=O)C1CCCC1C(=O)O[H]
A19	*C(=O)C1CCC(C(=O)O[H])C1
A20	*C(=O)CCC1(CCC(=O)O[H])CC1
A21	*C(=O)C(C)C1(C(C(=O)O[H])C)CC1
A22	*C(=O)C1C(=CC)C(C(=O)O[H])CCC1
A23	*C(=O)C1CC(=CC)CC(C(=O)O[H])C1
A24	*C(=O)C1CC(C(=O)O[H])C1CCCC
A25	*C(=O)c1c(C)oc(C)c(C(=O)O[H])c1=O
A26	*C(=O)Cc1oc(CC(=O)O[H])cc(=O)c1
A27	*C(=O)c1cc(C(=O)O[H])c(C)c(OC)c1C
A28	*C(=O)Cc1cccc(CC(=O)O[H])c1OC
A29	*C(=O)CC(CC(=O)O[H])(CC(=O)C)C(C)(C)CC
A30	*C(=O)CC(CC(=O)O[H])(CC)C(C)(C)CC(=O)C
A31	*C(=O)CC(C)(CC(=O)O[H])C(C)(C)C(C)CC
A32	*C(=O)CC(CC(=O)O[H])(C(C)CC)C(C)(C)C
A33	*C(=O)CC(C)(CC(=O)O[H])C(C=C(C)CC)(C)CC
A34	*C(=O)C1N(CCCC)C(C(=O)O[H])CC1
A35	*C(=O)CC(CC(=O)O[H])CCC1CCCC1
A36	*C(=O)C1CCC(C(=O)O[H])C1CCC(C)C
A37	*C(=O)c1cc(C(=O)O[H])c(CC)cc1CC
A38	*C(=O)C(c1cccc(C(C(=O)O[H])C)c1)C
A39	*C(=O)CCc1cccc(CCC(=O)O[H])c1
A40	*C(=O)c1cccc(C(=O)O[H])c1-c1nocc1
A41	*C(=O)c1cc(C(=O)O[H])cc(-c2nocc2)c1
A42	*C(=O)c1cccc(C(=O)O[H])c1-c1oncc1
A43	*C(=O)c1cc(C(=O)O[H])cc(-c2oncc2)c1
A44	*C(=O)c1cc(N(C)C)c2cc(C(=O)O[H])cc(N(C)C)c2c1
A45	*C(=O)c1ccc2c(N(C)C)c(C(=O)O[H])ccc2c1N(C)C
A46	*C(=O)CN(c1cccc2c(N(C)CC(=O)O[H])cccc12)C
A47	*C(=O)c1ccc(N(C)C)c2c(C(=O)O[H])ccc(N(C)C)c12
A48	*C(=O)CC(C)(CC(=O)O[H])C(C)(CC)CC(C)CC
A49	*C(=O)CC(C)C(C)(C)CC(C)(C)C(C)CC(=O)O[H]
A50	*C(=O)CC(CC(=O)O[H])C(C)(C)CC(C)(C)C(C)C
A51	*C(=O)C(C)(C)C(C)(C)CC(C)(C)C(C(=O)O[H])(C)C
A52	*C(=O)CC(C)(CC(C)(CC(=O)O[H])C(C)C)C(C)C
A53	*C(=O)CC(CC(=O)O[H])(CC(C)(C)C(C)C)C(C)C
A54	*C(=O)c1cc(C(=O)O[H])cc(CC(C)(C)C)c1
A55	*C(=O)c1cccc(C(=O)O[H])c1CC(C)(C)C
A56	*C(=O)CC(C)(CC(=O)O[H])Cc1ccccc1
A57	*C(=O)CC(C)CC(C)(CC(C)C)CC(C)CC(=O)O[H]
A58	*C(=O)CC(CC(=O)O[H])CC(C)(CC(C)C)CC(C)C
A59	*C(=O)C(C)(C)CC(C)(CC(C)C)CC(C(=O)O[H])(C)C
A60	*C(=O)C(C(C)C)C(C)(CC(C)C)C(C(=O)O[H])C(C)C
A61	*C(=O)C(C)CC(CCC)(CCCC)CC(C(=O)O[H])C
A62	*C(=O)CCCC(CCC)(CCCC(=O)O[H])CCCC
A63	*C(=O)C1CCCC2C(CC)CCC(C(=O)O[H])C12
A64	*C(=O)c1cccc(C(=O)O[H])c1C1=NN=C1
A65	*C(=O)c1cc(C(=O)O[H])cc(C2=NN=C2)c1
A66	*C(=O)Cc1cc(C)cc(CC(=O)O[H])c1C(=O)c1ccc(C)cc1C
A67	*C(=O)CN1C(=O)N(C)C2N(C)C(=O)N(CC(=O)O[H])C12
A68	*C(=O)CN1C(=O)N(CC(=O)O[H])C2N(C)C(=O)N(C)C12
A69	*C(=O)CN1C(=O)N(C)C2N(CC(=O)O[H])C(=O)N(C)C12
A70	*C(=O)C(C=CC(C(=O)O[H])(C)C)(C)C
A71	*C(=O)CC(C=CC(C)C)CC(=O)O[H]
A72	*C(=O)CC(C=CC(C)CC(=O)O[H])C
A73	*C(=O)C(CC=CCC(C(=O)O[H])CCC)CCC
A74	*C(=O)C(CC)CCC=CCCC(C(=O)O[H])CC
A75	*C(=O)C(C)CCCC=CCCCC(C(=O)O[H])C
A76	*C(=O)CCCCCC=CCCCCCC(=O)O[H]
A77	*C(=O)c1cc(C(=O)C)c(C(=O)O[H])cc1C(=O)C
A78	*C(=O)CC(=O)c1ccc(C(=O)CC(=O)O[H])cc1
A79	*C(=O)c1cc(OC)cc(C(=O)O[H])c1
A80	*C(=O)c1cccc(C(=O)O[H])c1OC
A81	*C(=O)c1cc(C(=O)O[H])cc(N(C)C)c1
A82	*C(=O)c1cccc(C(=O)O[H])c1N(C)C
A83	*C(=O)CN(c1ccccc1)CC(=O)O[H]
A84	*C(=O)c1cc(C(C)C)c(C(=O)O[H])cc1C(C)C
A85	*C(=O)C(c1ccc(C(C(=O)O[H])(C)C)cc1)(C)C
A86	*C(=O)CC(c1ccc(C(C)CC(=O)O[H])cc1)C
A87	*C(=O)c1cccc(C(=O)O[H])c1C=O
A88	*C(=O)c1cc(C=O)cc(C(=O)O[H])c1
A89	*C(=O)c1cc(N(C)C)c(C(=O)O[H])cc1N(C)C
A90	*C(=O)CN(c1ccc(N(C)CC(=O)O[H])cc1)C
A91	*C(=O)CCN(CC)CCC(=O)O[H]
A92	*C(=O)C(N(CC)C(C(=O)O[H])C)C
A93	*C(=O)C(N(CCS)C(C(=O)O[H])C)C
A94	*C(=O)CCN(CCS)CCC(=O)O[H]
A95	*C(=O)c1cncc(C(=O)O[H])c1C=C
A96	*C(=O)c1nc(C(=O)O[H])cc(C=C)c1
A97	*C(=O)c1cc(C#N)cc(C(=O)O[H])c1
A98	*C(=O)c1cccc(C(=O)O[H])c1C#N
A99	*C(=O)c1nc(C(=O)O[H])cc(C#N)c1
A100	*C(=O)c1cncc(C(=O)O[H])c1C#N
A101	*C(=O)C1=C(C(=O)O[H])CCCC1
A102	*C(=O)C1C=CC(C(=O)O[H])CC1
A103	*C(=O)C1CC=CCC1C(=O)O[H]
A104	*C(=O)c1cccc(C(=O)O[H])c1CS
A105	*C(=O)c1cc(C(=O)O[H])cc(CS)c1
A106	*C(=O)C1CCCC(C(=O)O[H])C1NC
A107	*C(=O)C1CC(C(=O)O[H])CC(NC)C1
A108	*C(=O)c1ccccc1C(=O)O[H]
A109	*C(=O)c1cccc(C(=O)O[H])c1
A110	*C(=O)c1ccc(C(=O)O[H])cc1
A111	*C(=O)C1C(=N)C(C(=O)O[H])CCC1
A112	*C(=O)C1CC(=N)CC(C(=O)O[H])C1
A113	*C(=O)c1cc(SC)cc(C(=O)O[H])c1
A114	*C(=O)c1cccc(C(=O)O[H])c1SC
A115	*C(=O)C1N(CC)C(C(=O)O[H])CC1
A116	*C(=O)C1N(N=O)C(C(=O)O[H])CCC1
A117	*C(=O)C1CN(N=O)CC(C(=O)O[H])C1
A118	*C(=O)CC1(CC(=O)O[H])OCC1C
A119	*C(=O)CCC(CCC(=O)O[H])C(C)(C)CC(C)(C)C(C)C
A120	*C(=O)CC(C)(C)C(CCCCCC)C(C)(C)CC(=O)O[H]
A121	*C(=O)CC(CC(=O)O[H])C1CCCC2CCCCC21
A122	*C(=O)C1CCCC2C1C(C(=O)O[H])CCC2C(C)C
A123	*C(=O)C1c2oc3c(c2CCC1)CCCC3C(=O)O[H]
A124	*C(=O)C1c2c(oc3c2C(C(=O)O[H])CCC3)CCC1
A125	*C(=O)C1Cc2c(oc3c2CC(C(=O)O[H])CC3)CC1
A126	*C(=O)C1Cc2oc3c(c2CC1)CCC(C(=O)O[H])C3
A127	*C(=O)C(N=C=O)CCCCCCC(N=C=O)C(=O)O[H]
A128	*C(=O)CC1(CC(=O)O[H])NCCC(C)C1
A129	*C(=O)c1cccc(N(C(=O)NCC=C)c2cccc(C(=O)O[H])c2)c1
A130	*C(=O)c1ccc(N(C(=O)NCC=C)c2ccc(C(=O)O[H])cc2)cc1
A131	*C(=O)c1ccccc1N(C(=O)NCC=C)c1ccccc1C(=O)O[H]
A132	*C(=O)CC(c1ccccc1C(C)(C)C)(C)CC(=O)O[H]
A133	*C(=O)c1ccc(C(=O)O[H])c(C(C)(C)C)c1C(C)(C)C
A134	*C(=O)CC(c1ccccc1C(C)(C)CC(=O)O[H])(C)C
A135	*C(=O)COC(C)CC(OCC(=O)O[H])C
A136	*C(=O)C(OC)(C)CC(OC)(C(=O)O[H])C
A137	*C(=O)CC(OC)CC(OC)CC(=O)O[H]
A138	*C(=O)c1cc2c(c3c(C(=O)O[H])cccc13)CCCC2
A139	*C(=O)C(C)(C)CC(CC(C(=O)O[H])(C)C)C(CC)CCCC
A140	*C(=O)CC(C)CC(CC(C)CC(=O)O[H])C(CC)CCCC
A141	*C(=O)CCC(CCC(=O)O[H])CCCCCCCCCCC
A142	*C(=O)CC(CC(=O)O[H])C(C)CC
A143	*C(=O)CCCCC(CC)CCC(CC)CCCCC(=O)O[H]
A144	*C(=O)C(C)CCC(CC)CCC(CC)CCC(C(=O)O[H])C
A145	*C(=O)C(CC)CC(CC)CCC(CC)CC(C(=O)O[H])CC
A146	*C(=O)C(CCC)C(CC)CCC(CC)C(C(=O)O[H])CCC
A147	*C(=O)C(C)C(CCCC)CCC(CCCC)C(C(=O)O[H])C
A148	*C(=O)CCC(CCCC)CCC(CCC(=O)O[H])CCCC
A149	*C(=O)c1cc(C(C)CC)c(C(=O)O[H])cc1C(C)CC
A150	*C(=O)C(c1ccc(C(C(=O)O[H])(C)CC)cc1)(C)CC
A151	*C(=O)CC(c1ccc(C(CC(=O)O[H])CC)cc1)CC
A152	*C(=O)C(C)C(c1ccc(C(C)C(C(=O)O[H])C)cc1)C
A153	*C(=O)CCC(c1ccc(C(C)CCC(=O)O[H])cc1)C
A154	*C(=O)CC(c1cccc(C(C)(C)C)c1)(C)CC(=O)O[H]
A155	*C(=O)c1cc(C(=O)O[H])c(C(C)(C)C)cc1C(C)(C)C
A156	*C(=O)CC(c1cccc(C(C)(C)CC(=O)O[H])c1)(C)C
A157	*C(=O)N(c1nc(SC)nc(N(C(=O)O[H])CC)n1)CC
A158	*C(=O)C(Nc1nc(SC)nc(NC(C(=O)O[H])C)n1)C
A159	*C(=O)CCNc1nc(SC)nc(NCCC(=O)O[H])n1
A160	*C(=O)c1c(C)c(C(=O)O[H])c(C)c(C)c1C
A161	*C(=O)Cc1cc(C)cc(CC(=O)O[H])c1C
A162	*C(=O)C1CCCC(C(CC(C)C)C2CCCC(C(=O)O[H])C2)C1
A163	*C(=O)C1CCCCC1C(CC(C)C)C1CCCCC1C(=O)O[H]
A164	*C(=O)C1CCC(C(CC(C)C)C2CCC(C(=O)O[H])CC2)CC1
A165	*C(=O)c1cc(C(=O)c2ccc(OCC)c(C(=O)O[H])c2)ccc1OCC
A166	*C(=O)C(Oc1ccc(C(=O)c2ccc(OC(C(=O)O[H])C)cc2)cc1)C
A167	*C(=O)CCOc1ccc(C(=O)c2ccc(OCCC(=O)O[H])cc2)cc1
A168	*C(=O)C(OC(C#C)OC(C(=O)O[H])C)C
A169	*C(=O)CCOC(C#C)OCCC(=O)O[H]
A170	*C(=O)c1ccc(C(=O)O[H])c(C)c1C
A171	*C(=O)Cc1ccccc1CC(=O)O[H]
A172	*C(=O)c1ccc2c(c1)-c1cc(C(=O)O[H])ccc1S2(=O)=O
A173	*C(=O)c1ccc2c(c1)S(=O)(=O)c1cc(C(=O)O[H])ccc1-2
A174	*C(=O)c1cccc2c1S(=O)(=O)c1c(C(=O)O[H])cccc1-2
A175	*C(=O)c1cccc2c1-c1c(C(=O)O[H])cccc1S2(=O)=O
A176	*C(=O)C(C)CCC(CCc1ccccc1)CCC(C(=O)O[H])C
A177	*C(=O)CCCCC(CCc1ccccc1)CCCCC(=O)O[H]
A178	*C(=O)C(CC)CC(CCc1ccccc1)CC(C(=O)O[H])CC
A179	*C(=O)N(c1nc(NC)nc(N(C(=O)O[H])C)n1)C
A180	*C(=O)CNc1nc(NC)nc(NCC(=O)O[H])n1
A181	*C(=O)C1CCC(C(=O)O[H])CC(S(=O)c2ccccc2)C1
A182	*C(=O)C1CCC(C(=O)O[H])CC(Sc2ccccc2)C1
A183	*C(=O)CCC(C1CCCCC1)C(CCC(=O)O[H])C1CCCCC1
A184	*C(=O)C(C)C(C1CCCCC1)C(C(C(=O)O[H])C)C1CCCCC1
A185	*C(=O)C1(C(CC)C(CC)C2(C(=O)O[H])CCCCC2)CCCCC1
A186	*C(=O)C1CCC(C(CC)C(CC)C2CCC(C(=O)O[H])CC2)CC1
A187	*C(=O)c1cccc(NC(=Nc2ccccc2)Nc2cccc(C(=O)O[H])c2)c1
A188	*C(=O)c1ccc(NC(=Nc2ccccc2)Nc2ccc(C(=O)O[H])cc2)cc1
A189	*C(=O)c1ccccc1NC(=Nc1ccccc1)Nc1ccccc1C(=O)O[H]
A190	*C(=O)c1ccc(OP(Oc2ccccc2)Oc2ccc(C(=O)O[H])cc2)cc1
A191	*C(=O)c1cccc(OP(Oc2ccccc2)Oc2cccc(C(=O)O[H])c2)c1
A192	*C(=O)c1ccccc1OP(Oc1ccccc1)Oc1ccccc1C(=O)O[H]
A193	*C(=O)c1ccc(Nc2ccc(C(=O)O[H])cc2)cc1
A194	*C(=O)c1cccc(Nc2cccc(C(=O)O[H])c2)c1
A195	*C(=O)c1ccccc1Nc1ccccc1C(=O)O[H]
A196	*C(=O)c1ccc(NC(=O)Nc2ccc(C(=O)O[H])cc2)cc1
A197	*C(=O)c1ccccc1NC(=O)Nc1ccccc1C(=O)O[H]
A198	*C(=O)c1cccc(NC(=O)Nc2cccc(C(=O)O[H])c2)c1
A199	*C(=O)c1cc(C(=O)O[H])cc(NC(C)C)c1
A200	*C(=O)c1cccc(C(=O)O[H])c1NC(C)C
A201	*C(=O)CC(Nc1ccccc1)CC(=O)O[H]
A202	*C(=O)C=CCOc1nc(OCC=CC(=O)O[H])nc(CC=C)n1
A203	*C(=O)C(=C)COc1nc(OCC(C(=O)O[H])=C)nc(CC=C)n1
A204	*C(=O)C1=CC(=O)C=C(C(=O)O[H])C1=N
A205	*C(=O)C1=CC(=N)C=C(C(=O)O[H])C1=O
A206	*C(=O)COC(OCC(=O)O[H])Cc1ccccc1
A207	*C(=O)c1ccc(Oc2ccc(C(=O)O[H])cc2)cc1
A208	*C(=O)c1cccc(Oc2cccc(C(=O)O[H])c2)c1
A209	*C(=O)c1ccccc1Oc1ccccc1C(=O)O[H]
A210	*C(=O)c1cc(Cc2ccc(N(C)C)c(C(=O)O[H])c2)ccc1N(C)C
A211	*C(=O)CN(c1ccc(Cc2ccc(N(C)CC(=O)O[H])cc2)cc1)C
A212	*C(=O)c1cc(N(C)C)ccc1Cc1ccc(N(C)C)cc1C(=O)O[H]
A213	*C(=O)c1cc(Cc2ccc(N=C=O)c(C(=O)O[H])c2)ccc1N=C=O
A214	*C(=O)c1cc(Nc2ccc(OC)c(C(=O)O[H])c2)ccc1OC
A215	*C(=O)COc1ccc(Nc2ccc(OCC(=O)O[H])cc2)cc1
A216	*C(=O)c1cc(OC)ccc1Nc1ccc(OC)cc1C(=O)O[H]
A217	*C(=O)c1ccc(Cc2ccc(C(=O)O[H])cc2)cc1
A218	*C(=O)c1cccc(Cc2cccc(C(=O)O[H])c2)c1
A219	*C(=O)c1ccccc1Cc1ccccc1C(=O)O[H]
A220	*C(=O)c1cc(C(=O)O[H])cc(NCC)c1
A221	*C(=O)c1cccc(C(=O)O[H])c1NCC
A222	*C(=O)CCCC(CCCC(=O)O[H])C(C)(C)C
A223	*C(=O)CC(C)(CC(=O)O[H])C(CCC)CCC
A224	*C(=O)C(C)CC(CC(C(=O)O[H])C)C(C)(C)C
A225	*C(=O)C(CC)C(C(C(=O)O[H])CC)C(C)(C)C
A226	*C(=O)CCCCCCCCCCCCC(=O)O[H]
A227	*C(=O)C(C)CCCCCCCCC(C(=O)O[H])C
A228	*C(=O)C(CC)CCCCCCC(C(=O)O[H])CC
A229	*C(=O)C(CCC)CCCCC(C(=O)O[H])CCC
A230	*C(=O)CCCCCCC(CCC)C(CCC)CCCCCCC(=O)O[H]
A231	*C(=O)CCCC(CCCCCC)C(CCCC(=O)O[H])CCCCCC
A232	*C(=O)C(C)CCCCC(CCC)C(CCC)CCCCC(C(=O)O[H])C
A233	*C(=O)C(CC)CCCC(CCC)C(CCC)CCCC(C(=O)O[H])CC
A234	*C(=O)C(CCC)CCC(CCC)C(CCC)CCC(C(=O)O[H])CCC
A235	*C(=O)C(CCCC)CC(CCC)C(CCC)CC(C(=O)O[H])CCCC
A236	*C(=O)C(C)CC(CCCCCC)C(CCCCCC)CC(C(=O)O[H])C
A237	*C(=O)CCCCCCCC#CCCCCCCCC(=O)O[H]
A238	*C(=O)C(C)CCCCCC#CCCCCCC(C(=O)O[H])C
A239	*C(=O)C(CC)CCCCC#CCCCCC(C(=O)O[H])CC
A240	*C(=O)C(CCC)CCCC#CCCCC(C(=O)O[H])CCC
A241	*C(=O)C(CCC#CCCC(C(=O)O[H])CCCC)CCCC
A242	*C(=O)C(CC#CCC(C(=O)O[H])CCCCC)CCCCC
A243	*C(=O)CC(C)(CC(=O)O[H])C1CCCCCCC1
A244	*C(=O)C1CCCCCC(C(=O)O[H])C1C(C)(C)C
A245	*C(=O)C1CCCC(C(=O)O[H])CC(C(C)(C)C)C1
A246	*C(=O)C1CCC(C(C)(C)C)CCC(C(=O)O[H])C1
A247	*C(=O)C12C(=O)C(C(=O)O[H])(CC1)CC2
A248	*C(=O)C1N(SSN2CCCCC2C(=O)O[H])CCCC1
A249	*C(=O)C1CCN(SSN2CCC(C(=O)O[H])CC2)CC1
A250	*C(=O)CC(c1cc(C)c(C)cc1C)CC(=O)O[H]
A251	*C(=O)CC1(CC(=O)O[H])CCC1
A252	*C(=O)C1CC(C(=O)O[H])C1(C)C
A253	*C(=O)C1CCCCC1C(C(C)CCCCCC)C1CCCCC1C(=O)O[H]
A254	*C(=O)C1CCCC(C(C(C)CCCCCC)C2CCCC(C(=O)O[H])C2)C1
A255	*C(=O)C1CCC(C(C(C)CCCCCC)C2CCC(C(=O)O[H])CC2)CC1
A256	*C(=O)c1ccccc1C(C=C)(c1ccccc1C(=O)O[H])CCCCC
A257	*C(=O)c1cccc(C(C=C)(c2cccc(C(=O)O[H])c2)CCCCC)c1
A258	*C(=O)c1ccc(C(C=C)(c2ccc(C(=O)O[H])cc2)CCCCC)cc1
A259	*C(=O)C=CCn1c(=O)n(CC=C)c(=O)n(CC=CC(=O)O[H])c1=O
A260	*C(=O)C(=C)Cn1c(=O)n(CC=C)c(=O)n(CC(C(=O)O[H])=C)c1=O
A261	*C(=O)N(C(=O)CCCCC(=O)N(C(=O)O[H])CCC)CCC
A262	*C(=O)C(NC(=O)CCCCC(=O)NC(C(=O)O[H])CC)CC
A263	*C(=O)C(C)CNC(=O)CCCCC(=O)NCC(C(=O)O[H])C
A264	*C(=O)CCCNC(=O)CCCCC(=O)NCCCC(=O)O[H]
A265	*C(=O)Cc1cccc(CC(=O)O[H])c1-c1ccccc1C
A266	*C(=O)CC1(CC(=O)O[H])C(C)CCC1CCC
A267	*C(=O)CC(C)(CC(=O)O[H])C(C=CC)C
A268	*C(=O)CC(C=C(C)CC)(C)CC(=O)O[H]
A269	*C(=O)CC(=CC(C)(C)CC)CC(=O)O[H]
A270	*C(=O)CC(C=C(C)C)(CC(=O)O[H])CC
A271	*C(=O)C1CCCC1CCCSCCCCCCSCCCC1CCCC1C(=O)O[H]
A272	*C(=O)C(SCCCCCCSC(C(=O)O[H])CCC1CCCC1)CCC1CCCC1
A273	*C(=O)C(CSCCCCCCSCC(C(=O)O[H])CC1CCCC1)CC1CCCC1
A274	*C(=O)C(CCSCCCCCCSCCC(C(=O)O[H])C1CCCC1)C1CCCC1
A275	*C(=O)C1(CCCSCCCCCCSCCCC2(C(=O)O[H])CCCC2)CCCC1
A276	*C(=O)C1CCC(CCCSCCCCCCSCCCC2CCC(C(=O)O[H])C2)C1
A277	*C(=O)CC(C)CC(CCCCC(CC(C)C)CC(C)CC(=O)O[H])CC(C)C
A278	*C(=O)CC(C)CC(CCCCC(CC(C)C)CC(C)C)CC(C)CC(=O)O[H]
A279	*C(=O)C(C(C)C)C(CCCCC(CC(C)C)C(C(=O)O[H])C(C)C)CC(C)C
A280	*C(=O)C(C)(C)CC(CCCCC(CC(C)C)CC(C)C)CC(C(=O)O[H])(C)C
A281	*C(=O)C(C)(C)CC(CCCCC(CC(C)C)CC(C(=O)O[H])(C)C)CC(C)C
A282	*C(=O)C(CCCCC(C(=O)O[H])(CC(C)C)CC(C)C)(CC(C)C)CC(C)C
A283	*C(=O)CCCCC(CC)CCCCCCCCC(CC)CCCCC(=O)O[H]
A284	*C(=O)C(C)CCC(CC)CCCCCCCCC(CC)CCC(C(=O)O[H])C
A285	*C(=O)C(CC)CC(CC)CCCCCCCCC(CC)CC(C(=O)O[H])CC
A286	*C(=O)C(CCC)C(CC)CCCCCCCCC(CC)C(C(=O)O[H])CCC
A287	*C(=O)C(CC)(CCCC)CCCCCCCCC(C(=O)O[H])(CC)CCCC
A288	*C(=O)C(C)C(CCCC)CCCCCCCCC(CCCC)C(C(=O)O[H])C
A289	*C(=O)CCC(CCCC)CCCCCCCCC(CCC(=O)O[H])CCCC
A290	*C(=O)C(CCCCCCC(C(=O)O[H])C(CC)CCCC)C(CC)CCCC
A291	*C(=O)c1ccccc1CC(C=C)(c1ccccc1)Cc1ccccc1C(=O)O[H]
A292	*C(=O)c1cccc(CC(C=C)(c2ccccc2)Cc2cccc(C(=O)O[H])c2)c1
A293	*C(=O)c1ccc(CC(C=C)(c2ccccc2)Cc2ccc(C(=O)O[H])cc2)cc1
A294	*C(=O)CCCCCCCCCCCCCC(=O)O[H]
A295	*C(=O)C(C)CCCCCCCCCC(C(=O)O[H])C
A296	*C(=O)C(CC)CCCCCCCC(C(=O)O[H])CC
A297	*C(=O)C(CCC)CCCCCC(C(=O)O[H])CCC
A298	*C(=O)C(CCCC)CCCC(C(=O)O[H])CCCC
A299	*C(=O)CC(CC(=O)O[H])(CC=C)CC(C)C
A300	*C(=O)CC(CC(=O)O[H])CC(C)(C)CC=C
A301	*C(=O)CC(CC(=O)O[H])CC(C)CC(=C)C
A302	*C(=O)CC(C)(C)CC(c1ccc(C(C)(C)CC(C)(C)CC(=O)O[H])cc1)(C)C
A303	*C(=O)CC(c1ccc(C(C)(CC(=O)O[H])CC(C)(C)C)cc1)(C)CC(C)(C)C
A304	*C(=O)C(C(c1ccc(C(C)(C)C(C(=O)O[H])C(C)(C)C)cc1)(C)C)C(C)(C)C
A305	*C(=O)C(=C(CC)CCCC)CCCCCCC(C(=O)O[H])=C(CC)CCCC
A306	*C(=O)C(C(=CCCCCCCC=C(CCCC)C(C(=O)O[H])C)CCCC)C
A307	*C(=O)CCC(=CCCCCCCC=C(CCC(=O)O[H])CCCC)CCCC
A308	*C(=O)C(C(=CCCCCCCC=C(CC)C(C(=O)O[H])CCC)CC)CCC
A309	*C(=O)C(CC(=CCCCCCCC=C(CC)CC(C(=O)O[H])CC)CC)CC
A310	*C(=O)C(C)CCC(=CCCCCCCC=C(CC)CCC(C(=O)O[H])C)CC
A311	*C(=O)CCCCC(=CCCCCCCC=C(CC)CCCCC(=O)O[H])CC
A312	*C(=O)CCC(CCC(=O)O[H])CCCCC#C
A313	*C(=O)c1ccc(CC(=O)Cc2ccc(C(=O)O[H])cc2)cc1
A314	*C(=O)c1ccccc1CC(=O)Cc1ccccc1C(=O)O[H]
A315	*C(=O)c1cccc(CC(=O)Cc2cccc(C(=O)O[H])c2)c1
A316	*C(=O)c1ccccc1NC(=N)Nc1ccccc1C(=O)O[H]
A317	*C(=O)c1cccc(NC(=N)Nc2cccc(C(=O)O[H])c2)c1
A318	*C(=O)c1ccc(NC(=N)Nc2ccc(C(=O)O[H])cc2)cc1
A319	*C(=O)c1ccc(NC(=S)Nc2ccc(C(=O)O[H])cc2)cc1
A320	*C(=O)c1ccccc1NC(=S)Nc1ccccc1C(=O)O[H]
A321	*C(=O)c1cccc(NC(=S)Nc2cccc(C(=O)O[H])c2)c1
A322	*C(=O)c1ccc(CCCc2ccc(C(=O)O[H])cc2)cc1
A323	*C(=O)c1cccc(CCCc2cccc(C(=O)O[H])c2)c1
A324	*C(=O)c1ccccc1CCCc1ccccc1C(=O)O[H]
A325	*C(=O)c1c(CC)cc(CC)c(C(=O)O[H])c1CC
A326	*C(=O)C(c1cc(CC)cc(C(C(=O)O[H])C)c1)C
A327	*C(=O)CCc1cc(CC)cc(CCC(=O)O[H])c1
A328	*C(=O)c1cc(C(=O)O[H])cc(NC(=O)C)c1
A329	*C(=O)c1cccc(C(=O)O[H])c1NC(=O)C
A330	*C(=O)c1cc(N=C=O)cc(C(=O)O[H])c1
A331	*C(=O)c1cccc(C(=O)O[H])c1N=C=O
A332	*C(=O)C1CCC(C(=O)O[H])C1CC(NC)C
A333	*C(=O)COC(OCC(=O)O[H])CC(OC)C
A334	*C(=O)C(N(CN(CC)C(C(=O)O[H])C)CC)C
A335	*C(=O)C(N(CN(CC)CC)C(C(=O)O[H])C)C
A336	*C(=O)CCN(CN(CC)CCC(=O)O[H])CC
A337	*C(=O)CCN(CN(CC)CC)CCC(=O)O[H]
A338	*C(=O)c1cc(OC)c(C(=O)O[H])cc1OC
A339	*C(=O)COc1ccc(OCC(=O)O[H])cc1
A340	*C(=O)CCCN(CCC)CCCC(=O)O[H]
A341	*C(=O)C(C)CN(CCC)CC(C(=O)O[H])C
A342	*C(=O)C(N(CCC)C(C(=O)O[H])CC)CC
A343	*C(=O)C=CCN(CC=C)CC=CC(=O)O[H]
A344	*C(=O)C(=C)CN(CC=C)CC(C(=O)O[H])=C
A345	*C(=O)CCN(CCC(=O)O[H])CCCC
A346	*C(=O)C(N(CCCC)C(C(=O)O[H])C)C
A347	*C(=O)C(CN(CC)CC(C(=O)O[H])CC)CC
A348	*C(=O)C(C)CCN(CC)CCC(C(=O)O[H])C
A349	*C(=O)CCCCN(CC)CCCCC(=O)O[H]
A350	*C(=O)CCCCN(CCCC)CCCCC(=O)O[H]
A351	*C(=O)C(C)CCN(CCCC)CCC(C(=O)O[H])C
A352	*C(=O)C(CN(CCCC)CC(C(=O)O[H])CC)CC
A353	*C(=O)C(CN(CCC)CC(C(=O)O[H])CC)CC
A354	*C(=O)C(C)CCN(CCC)CCC(C(=O)O[H])C
A355	*C(=O)CCCCN(CCC)CCCCC(=O)O[H]
A356	*C(=O)CCCCOP(OCCCCC(=O)O[H])CCCC
A357	*C(=O)C(C)CCOP(OCCC(C(=O)O[H])C)CCCC
A358	*C(=O)C(OP(OC(C(=O)O[H])CCC)CCCC)CCC
A359	*C(=O)CCCCCCN(CCCCCC)CCCCCCC(=O)O[H]
A360	*C(=O)C(CCN(CCCCCC)CCC(C(=O)O[H])CCC)CCC
A361	*C(=O)C(CC)CCCN(CCCCCC)CCCC(C(=O)O[H])CC
A362	*C(=O)C(C)CCCCN(CCCCCC)CCCCC(C(=O)O[H])C
A363	*C(=O)C(CN(CCCCCC)CC(C(=O)O[H])CCCC)CCCC
A364	*C(=O)c1cccc(C(=O)O[H])c1C=C
A365	*C(=O)c1cc(C(=O)O[H])cc(C=C)c1
A366	*C(=O)CCCCCCCC1CCC(C2CCC(CCCCCCCC(=O)O[H])CC2)CC1
A367	*C(=O)C(C)CCCCCC1CCC(C2CCC(CCCCCC(C(=O)O[H])C)CC2)CC1
A368	*C(=O)C(CC)CCCCC1CCC(C2CCC(CCCCC(C(=O)O[H])CC)CC2)CC1
A369	*C(=O)C(CCC)CCCC1CCC(C2CCC(CCCC(C(=O)O[H])CCC)CC2)CC1
A370	*C(=O)C(CCCC)CCC1CCC(C2CCC(CCC(C(=O)O[H])CCCC)CC2)CC1
A371	*C(=O)C(CCCCC)CC1CCC(C2CCC(CC(C(=O)O[H])CCCCC)CC2)CC1
A372	*C(=O)C(CCCCCC)C1CCC(C2CCC(C(C(=O)O[H])CCCCCC)CC2)CC1
A373	*C(=O)C1(CCCCCCC)CCC(C2CCC(C(=O)O[H])(CCCCCCC)CC2)CC1
A374	*C(=O)C=CCCCCCCCCCCCCCCCCCCCCCCC=CC(=O)O[H]
A375	*C(=O)C(=C)CCCCCCCCCCCCCCCCCCCCCCC(C(=O)O[H])=C
A376	*C(=O)C(C=C)CCCCCCCCCCCCCCCCCCCCC(C(=O)O[H])C=C
A377	*C(=O)C(CC=C)CCCCCCCCCCCCCCCCCCC(C(=O)O[H])CC=C
A378	*C(=O)C(CCC=C)CCCCCCCCCCCCCCCCC(C(=O)O[H])CCC=C
A379	*C(=O)C(CCCC=C)CCCCCCCCCCCCCCC(C(=O)O[H])CCCC=C
A380	*C(=O)C(CCCCC=C)CCCCCCCCCCCCC(C(=O)O[H])CCCCC=C
A381	*C(=O)C(CCCCCC=C)CCCCCCCCCCC(C(=O)O[H])CCCCCC=C
A382	*C(=O)C(CCCCCCC=C)CCCCCCCCC(C(=O)O[H])CCCCCCC=C
A383	*C(=O)C1CCCCC1C(c1ccccc1)(CCCCCCC)C1CCCCC1C(=O)O[H]
A384	*C(=O)C1CCCC(C(c2ccccc2)(CCCCCCC)C2CCCC(C(=O)O[H])C2)C1
A385	*C(=O)C1CCC(C(c2ccccc2)(CCCCCCC)C2CCC(C(=O)O[H])CC2)CC1
A386	*C(=O)CCOP(=S)(OCCC(=O)O[H])SC(N1C(=O)c2ccccc2C1=O)C
A387	*C(=O)CC(CC(=O)O[H])CN1CCCCC1
A388	*C(=O)C1N(CC(C)C)C(C(=O)O[H])CCC1
A389	*C(=O)C1CN(CC(C)C)CC(C(=O)O[H])C1
A390	*C(=O)C(CCCCCC)CCC(CCCCCCCCCC)CCC(C(=O)O[H])CCCCCC
A391	*C(=O)C(CCCCC)CCCC(CCCCCCCCCC)CCCC(C(=O)O[H])CCCCC
A392	*C(=O)C(CCCC)CCCCC(CCCCCCCCCC)CCCCC(C(=O)O[H])CCCC
A393	*C(=O)C(CCC)CCCCCC(CCCCCCCCCC)CCCCCC(C(=O)O[H])CCC
A394	*C(=O)C(CC)CCCCCCC(CCCCCCCCCC)CCCCCCC(C(=O)O[H])CC
A395	*C(=O)C(C)CCCCCCCC(CCCCCCCCCC)CCCCCCCC(C(=O)O[H])C
A396	*C(=O)CCCCCCCCCC(CCCCCCCCCC(=O)O[H])CCCCCCCCCC
A397	*C(=O)CC1C(C)c2ccccc2C(C)C1CC(=O)O[H]
A398	*C(=O)c1ccc(C(=O)O[H])c2c1C(C)C(C)C(C)C2C
A399	*C(=O)CC1c2ccccc2C(CC(=O)O[H])C(C)C1C
A400	*C(=O)CCCCC(CC)CCCCCCCCCCC(CC)CCCCC(=O)O[H]
A401	*C(=O)C(C)CCC(CC)CCCCCCCCCCC(CC)CCC(C(=O)O[H])C
A402	*C(=O)C(CC)CC(CC)CCCCCCCCCCC(CC)CC(C(=O)O[H])CC
A403	*C(=O)C(CCC)C(CC)CCCCCCCCCCC(CC)C(C(=O)O[H])CCC
A404	*C(=O)C(CC)(CCCC)CCCCCCCCCCC(C(=O)O[H])(CC)CCCC
A405	*C(=O)C(C)C(CCCC)CCCCCCCCCCC(CCCC)C(C(=O)O[H])C
A406	*C(=O)CCC(CCCC)CCCCCCCCCCC(CCC(=O)O[H])CCCC
A407	*C(=O)C(CCCCCCCCC(C(=O)O[H])C(CC)CCCC)C(CC)CCCC
A408	*C(=O)C(CCCCCCC(C(=O)O[H])CC(CC)CCCC)CC(CC)CCCC
A409	*C(=O)CC(C)CC(CCCCCCCCCCCCCCC)CC(C)CC(=O)O[H]
A410	*C(=O)CCC1=C(CCC(=O)O[H])CCCC1
A411	*C(=O)C(C1=C(C(C(=O)O[H])C)CCCC1)C
A412	*C(=O)C1C(CC)=C(CC)C(C(=O)O[H])CC1
A413	*C(=O)C(CCCCC)CCCC(CCCCCCCCCCC)CCCC(C(=O)O[H])CCCCC
A414	*C(=O)C(CCCC)CCCCC(CCCCCCCCCCC)CCCCC(C(=O)O[H])CCCC
A415	*C(=O)C(CCC)CCCCCC(CCCCCCCCCCC)CCCCCC(C(=O)O[H])CCC
A416	*C(=O)C(CC)CCCCCCC(CCCCCCCCCCC)CCCCCCC(C(=O)O[H])CC
A417	*C(=O)C(C)CCCCCCCC(CCCCCCCCCCC)CCCCCCCC(C(=O)O[H])C
A418	*C(=O)CCCCCCCCCC(CCCCCCCCCC(=O)O[H])CCCCCCCCCCC
A419	*C(=O)CCCCCCC(CCCC)CCCCCCCCC(CCCC)CCCCCCC(=O)O[H]
A420	*C(=O)C(C)CCC(CCCCCC)CCCCCCCCC(CCCCCC)CCC(C(=O)O[H])C
A421	*C(=O)CCCCC(CCCCCC)CCCCCCCCC(CCCCC(=O)O[H])CCCCCC
A422	*C(=O)C(CCCCCCC(C(=O)O[H])C(CCCC)CCCCCC)C(CCCC)CCCCCC
A423	*C(=O)C(C)CCCCC(CCCC)CCCCCCCCC(CCCC)CCCCC(C(=O)O[H])C
A424	*C(=O)C(CC)CCCC(CCCC)CCCCCCCCC(CCCC)CCCC(C(=O)O[H])CC
A425	*C(=O)C(CCC)CCC(CCCC)CCCCCCCCC(CCCC)CCC(C(=O)O[H])CCC
A426	*C(=O)C(CCCC)CC(CCCC)CCCCCCCCC(CCCC)CC(C(=O)O[H])CCCC
A427	*C(=O)C(CCCCC)C(CCCC)CCCCCCCCC(CCCC)C(C(=O)O[H])CCCCC
A428	*C(=O)C(CCCC)(CCCCCC)CCCCCCCCC(C(=O)O[H])(CCCC)CCCCCC
A429	*C(=O)C(CCC)C(CCCCCC)CCCCCCCCC(CCCCCC)C(C(=O)O[H])CCC
A430	*C(=O)C(CC)CC(CCCCCC)CCCCCCCCC(CCCCCC)CC(C(=O)O[H])CC
A431	*C(=O)C(N(C)C(C(=O)O[H])(C)C)(C)C
A432	*C(=O)CC(N(C)C(C)C)CC(=O)O[H]
A433	*C(=O)CC(N(C)C(C)CC(=O)O[H])C
A434	*C(=O)c1cccc(C(=O)O[H])c1-c1nonc1
A435	*C(=O)c1cc(C(=O)O[H])cc(-c2nonc2)c1
A436	*C(=O)c1ccc(C(=O)c2nonc2C(=O)c2ccc(C(=O)O[H])cc2)cc1
A437	*C(=O)c1ccccc1C(=O)c1nonc1C(=O)c1ccccc1C(=O)O[H]
A438	*C(=O)c1cccc(C(=O)c2nonc2C(=O)c2cccc(C(=O)O[H])c2)c1
A439	*C(=O)CC(CC(=O)O[H])CCCC
A440	*C(=O)c1cccc2c1C=Cc1c(C(=O)O[H])cccc1C2
A441	*C(=O)c1ccc2c(c1)C=Cc1cc(C(=O)O[H])ccc1C2
A442	*C(=O)c1ccc2c(c1)Cc1cc(C(=O)O[H])ccc1C=C2
A443	*C(=O)c1cccc2c1Cc1c(C(=O)O[H])cccc1C=C2
A444	*C(=O)C(CC=CCC(C(=O)O[H])CCCC)CCCC
A445	*C(=O)C(CCC=CCCC(C(=O)O[H])CCC)CCC
A446	*C(=O)C(CC)CCCC=CCCCC(C(=O)O[H])CC
A447	*C(=O)C(C)CCCCC=CCCCCC(C(=O)O[H])C
A448	*C(=O)CCCCCCC=CCCCCCCC(=O)O[H]
A449	*C(=O)CCCCCCCCCCCCCCCCCCCCC(=O)O[H]
A450	*C(=O)C(C)CCCCCCCCCCCCCCCCC(C(=O)O[H])C
A451	*C(=O)C(CC)CCCCCCCCCCCCCCC(C(=O)O[H])CC
A452	*C(=O)C(CCC)CCCCCCCCCCCCC(C(=O)O[H])CCC
A453	*C(=O)C(CCCC)CCCCCCCCCCC(C(=O)O[H])CCCC
A454	*C(=O)C(CCCCC)CCCCCCCCC(C(=O)O[H])CCCCC
A455	*C(=O)C(CCCCCC)CCCCCCC(C(=O)O[H])CCCCCC
A456	*C(=O)C1CC(C(=O)O[H])CC2(CCCC2)C1
A457	*C(=O)C1CCCC(C(=O)O[H])C12CCCC2
A458	*C(=O)C1CCC(C(=O)O[H])C12CCCCC2
A459	*C(=O)c1ccc(-c2cccc3cccc(-c4ccc(C(=O)O[H])cc4)c23)cc1
A460	*C(=O)c1ccccc1-c1cccc2cccc(-c3ccccc3C(=O)O[H])c12
A461	*C(=O)c1cccc(-c2cccc3cccc(-c4cccc(C(=O)O[H])c4)c23)c1
A462	*C(=O)c1ccc2ccc(C(=O)O[H])c(-c3ccccc3)c2c1-c1ccccc1
A463	*C(=O)c1cc(-c2ccccc2)c2c(-c3ccccc3)cc(C(=O)O[H])cc2c1
A464	*C(=O)c1cc(C)ccc1P(c1ccc(C)cc1)c1ccc(C)cc1C(=O)O[H]
A465	*C(=O)c1cc(P(c2ccc(C)cc2)c2ccc(C)c(C(=O)O[H])c2)ccc1C
A466	*C(=O)Cc1ccc(P(c2ccc(C)cc2)c2ccc(CC(=O)O[H])cc2)cc1
A467	*C(=O)CCCCCCCCCCCCCCCCCCCC(=O)O[H]
A468	*C(=O)C(C)CCCCCCCCCCCCCCCC(C(=O)O[H])C
A469	*C(=O)C(CC)CCCCCCCCCCCCCC(C(=O)O[H])CC
A470	*C(=O)C(CCC)CCCCCCCCCCCC(C(=O)O[H])CCC
A471	*C(=O)C(CCCC)CCCCCCCCCC(C(=O)O[H])CCCC
A472	*C(=O)C(CCCCC)CCCCCCCC(C(=O)O[H])CCCCC
A473	*C(=O)C(CCCCCC)CCCCCC(C(=O)O[H])CCCCCC
A474	*C(=O)CC(=C(C)CC(C)(C)CC)CC(=O)O[H]
A475	*C(=O)CC(CC(=O)O[H])(CC(=C(C)C)C)CC
A476	*C(=O)CC(CC(=O)O[H])CC(C=C(C)C)(C)C
A477	*C(=O)CC(=CC(C)(C)CC(C)C)CC(=O)O[H]
A478	*C(=O)CC(C=C(C)C)(CC(=O)O[H])CC(C)C
A479	*C(=O)CC(C)(CC(=O)O[H])C(C)(CC=C)CC
A480	*C(=O)CCC(C=C(C)CC)(C)CCC(=O)O[H]
A481	*C(=O)CC(CC(=O)O[H])C(C)(CC(=C)C)CC
A482	*C(=O)CCC(CCC(=O)O[H])C(C(=C)C)C
A483	*C(=O)CCCCC(CC)CCCCC(=O)O[H]
A484	*C(=O)C(C)CCC(CC)CCC(C(=O)O[H])C
A485	*C(=O)C(CC)CC(CC)CC(C(=O)O[H])CC
A486	*C(=O)C(C)C(CCCC)C(C(=O)O[H])C
A487	*C(=O)CCC(CCC(=O)O[H])CCCC
A488	*C(=O)c1cc(C)ccc1SSc1ccc(C)cc1C(=O)O[H]
A489	*C(=O)c1cc(SSc2ccc(C)c(C(=O)O[H])c2)ccc1C
A490	*C(=O)Cc1ccc(SSc2ccc(CC(=O)O[H])cc2)cc1
A491	*C(=O)CCCCC(CC)CCCCCCCCCC(CC)CCCCC(=O)O[H]
A492	*C(=O)C(C)CCC(CC)CCCCCCCCCC(CC)CCC(C(=O)O[H])C
A493	*C(=O)C(CC)CC(CC)CCCCCCCCCC(CC)CC(C(=O)O[H])CC
A494	*C(=O)C(CCC)C(CC)CCCCCCCCCC(CC)C(C(=O)O[H])CCC
A495	*C(=O)C(CC)(CCCC)CCCCCCCCCC(C(=O)O[H])(CC)CCCC
A496	*C(=O)C(C)C(CCCC)CCCCCCCCCC(CCCC)C(C(=O)O[H])C
A497	*C(=O)CCC(CCCC)CCCCCCCCCC(CCC(=O)O[H])CCCC
A498	*C(=O)C(CCCCCCCC(C(=O)O[H])C(CC)CCCC)C(CC)CCCC
A499	*C(=O)C(CCCCCC(C(=O)O[H])CC(CC)CCCC)CC(CC)CCCC
A500	*C(=O)c1cc(C(=O)O[H])cc(CC(C)C)c1
A501	*C(=O)c1cccc(C(=O)O[H])c1CC(C)C
A502	*C(=O)CC(CC(=O)O[H])Cc1ccccc1
A503	*C(=O)C1N(SSN2CCCC2C(=O)O[H])CCC1
A504	*C(=O)c1ccc(CNCc2ccc(C(=O)O[H])cc2)cc1
A505	*C(=O)c1cccc(CNCc2cccc(C(=O)O[H])c2)c1
A506	*C(=O)c1ccccc1CNCc1ccccc1C(=O)O[H]
A507	*C(=O)c1cc(C(=O)O[H])cc(CNC)c1
A508	*C(=O)c1cccc(C(=O)O[H])c1CNC
A509	*C(=O)c1cc(N=C=S)cc(C(=O)O[H])c1
A510	*C(=O)c1cccc(C(=O)O[H])c1N=C=S
A511	*C(=O)C1NC(C(=O)O[H])CN(CC)C1
A512	*C(=O)C1N(CC)C(C(=O)O[H])CNC1
A513	*C(=O)C1CCCC(C(=O)O[H])C1CC(=O)C
A514	*C(=O)C1CC(C(=O)O[H])CC(CC(=O)C)C1
A515	*C(=O)c1cc(C(=O)O[H])cc(C)c1
A516	*C(=O)c1cccc(C(=O)O[H])c1C
A517	*C(=O)c1cc(C(=O)O[H])cc(CN(C)C)c1
A518	*C(=O)c1cccc(C(=O)O[H])c1CN(C)C
A519	*C(=O)CN(CC(=O)O[H])Cc1ccccc1
A520	*C(=O)c1cccc(C(=O)O[H])c1NC=S
A521	*C(=O)c1cc(C(=O)O[H])cc(NC=S)c1
A522	*C(=O)c1ccc(S(=O)(=O)S(=O)(=O)c2ccc(C(=O)O[H])cc2)cc1
A523	*C(=O)c1ccccc1S(=O)(=O)S(=O)(=O)c1ccccc1C(=O)O[H]
A524	*C(=O)c1cccc(S(=O)(=O)S(=O)(=O)c2cccc(C(=O)O[H])c2)c1
A525	*C(=O)CC(=C(C(C)C)C(C)C)CC(=O)O[H]
A526	*C(=O)C(C(=C(C)C)C(C(=O)O[H])(C)C)(C)C
A527	*C(=O)CC(C(=C(C)C)C(C)C)CC(=O)O[H]
A528	*C(=O)CC(C(=C(C)C)C(C)CC(=O)O[H])C
A529	*C(=O)CCCCCC#CCC#CCC#CCC#CCCCCCC(=O)O[H]
A530	*C(=O)CC(C(=C(C)C)c1ccccc1)CC(=O)O[H]
A531	*C(=O)c1cc(C(=O)O[H])cc(C(=C(C)C)C(C)C)c1
A532	*C(=O)c1cccc(C(=O)O[H])c1C(=C(C)C)C(C)C
A533	*C(=O)CC(=C(c1ccccc1)C(C)C)CC(=O)O[H]
A534	*C(=O)c1ccc2c(c1)N=c1cc3c(cc1C2=O)=Nc1cc(C(=O)O[H])ccc1C3=O
A535	*C(=O)c1ccc2c(c1)C(=O)c1cc3c(cc1=N2)C(=O)c1cc(C(=O)O[H])ccc1N=3
A536	*C(=O)c1cccc2c1C(=O)c1cc3c(cc1=N2)C(=O)c1c(cccc1C(=O)O[H])N=3
A537	*C(=O)c1cccc2c1N=c1cc3c(cc1C2=O)=Nc1c(C(=O)O[H])cccc1C3=O
A538	*C(=O)c1cc(C(=O)O[H])cc(C(=C(C)C)CC)c1
A539	*C(=O)c1cccc(C(=O)O[H])c1C(=C(C)C)CC
A540	*C(=O)CC(=C(c1ccccc1)CC)CC(=O)O[H]
A541	*C(=O)c1cc(C(=O)O[H])cc(C2CCCC2)c1
A542	*C(=O)c1cccc(C(=O)O[H])c1C1CCCC1
A543	*C(=O)C1CCC(C(=O)O[H])C1c1ccccc1
A544	*C(=O)c1ccc(S(c2ccccc2)(c2ccccc2)c2ccc(C(=O)O[H])cc2)cc1
A545	*C(=O)c1cccc(S(c2ccccc2)(c2ccccc2)c2cccc(C(=O)O[H])c2)c1
A546	*C(=O)c1ccccc1S(c1ccccc1)(c1ccccc1)c1ccccc1C(=O)O[H]
A547	*C(=O)CCC(CCC(=O)O[H])(CCCC)CCC(C)(C)C
A548	*C(=O)CCC(C=CC(C)(C)C)(CCC(=O)O[H])CCCC
A549	*C(=O)CC(C)CS(=O)(=O)CC(C)CC(=O)O[H]
A550	*C(=O)CC(CC(=O)O[H])CS(=O)(=O)CC(C)C
A551	*C(=O)C(C)(C)CS(=O)(=O)CC(C(=O)O[H])(C)C
A552	*C(=O)C(C(C)C)S(=O)(=O)C(C(=O)O[H])C(C)C
A553	*C(=O)c1cc(C)cc(C(=O)O[H])c1OC
A554	*C(=O)c1cc(OC)cc(C(=O)O[H])c1C
A555	*C(=O)c1cc(C)c(C(=O)O[H])cc1C
A556	*C(=O)c1cc(C)cc(C(=O)O[H])c1C
A557	*C(=O)Cc1ccc(CC(=O)O[H])cc1
A558	*C(=O)c1cc(S(=O)=O)cc(C(=O)O[H])c1C
A559	*C(=O)c1cc(C)cc(C(=O)O[H])c1S(=O)=O
A560	*C(=O)C(Oc1ccc(OC(C(=O)O[H])CCC)cc1)CCC
A561	*C(=O)C(COc1ccc(OCC(C(=O)O[H])CC)cc1)CC
A562	*C(=O)C(C)CCOc1ccc(OCCC(C(=O)O[H])C)cc1
A563	*C(=O)CCCCOc1ccc(OCCCCC(=O)O[H])cc1
A564	*C(=O)c1cc(N=C=O)c(C(=O)O[H])cc1N=C=O
A565	*C(=O)c1cc(C(=O)O[H])cc(CC)c1
A566	*C(=O)c1cccc(C(=O)O[H])c1CC
A567	*C(=O)c1cccc(C(=O)O[H])c1C=CC
A568	*C(=O)c1cc(C(=O)O[H])cc(C=CC)c1
A569	*C(=O)C(=NCCN=C(C(=O)O[H])c1ccccc1)c1ccccc1
A570	*C(=O)c1ccc(C=NCCN=Cc2ccc(C(=O)O[H])cc2)cc1
A571	*C(=O)c1cccc(C=NCCN=Cc2cccc(C(=O)O[H])c2)c1
A572	*C(=O)c1ccccc1C=NCCN=Cc1ccccc1C(=O)O[H]
A573	*C(=O)CCN(CCC(=O)O[H])CCC
A574	*C(=O)C(N(CCC)C(C(=O)O[H])C)C
A575	*C(=O)C(N(CCNC)C(C(=O)O[H])C)C
A576	*C(=O)CCN(CCC(=O)O[H])CCNC
A577	*C(=O)CC1CCC1CC(=O)O[H]
A578	*C(=O)C1(C)CCC1(C(=O)O[H])C
A579	*C(=O)C1C(C(=O)O[H])C(C)C1C
A580	*C(=O)c1cc(C)cc(C(=O)O[H])c1C#N
A581	*C(=O)c1cc(C#N)cc(C(=O)O[H])c1C
A582	*C(=O)C1CCC(C(=O)O[H])C1CC
A583	*C(=O)CCC(OOC(C)(C)CCC(=O)O[H])(C)C
A584	*C(=O)CC(OOC(C)(CC(=O)O[H])CC)(C)CC
A585	*C(=O)C=CCS(c1ccccc1)(c1ccccc1)CC=CC(=O)O[H]
A586	*C(=O)c1ccccc1S(c1ccccc1C(=O)O[H])(CC=C)CC=C
A587	*C(=O)C(=C)CS(c1ccccc1)(c1ccccc1)CC(C(=O)O[H])=C
A588	*C(=O)c1cccc(S(c2cccc(C(=O)O[H])c2)(CC=C)CC=C)c1
A589	*C(=O)c1ccc(S(c2ccc(C(=O)O[H])cc2)(CC=C)CC=C)cc1
A590	*C(=O)CCC(CC)(CCC(=O)O[H])C(C)CC
A591	*C(=O)CC(CC(=O)O[H])(CC)CCC
A592	*C(=O)CCCCCCCCCC(C)(CCCCCCCCC)CCCCCCCCCC(=O)O[H]
A593	*C(=O)C(CCCCCC)CCC(C)(CCCCCCCCC)CCC(C(=O)O[H])CCCCCC
A594	*C(=O)C(CCCCC)CCCC(C)(CCCCCCCCC)CCCC(C(=O)O[H])CCCCC
A595	*C(=O)C(CCCC)CCCCC(C)(CCCCCCCCC)CCCCC(C(=O)O[H])CCCC
A596	*C(=O)C(CCC)CCCCCC(C)(CCCCCCCCC)CCCCCC(C(=O)O[H])CCC
A597	*C(=O)C(CC)CCCCCCC(C)(CCCCCCCCC)CCCCCCC(C(=O)O[H])CC
A598	*C(=O)C(C)CCCCCCCC(C)(CCCCCCCCC)CCCCCCCC(C(=O)O[H])C
A599	*C(=O)c1ccc(S(c2ccc(C(=O)O[H])cc2)(C)C)cc1
A600	*C(=O)c1cccc(S(c2cccc(C(=O)O[H])c2)(C)C)c1
A601	*C(=O)c1ccccc1S(c1ccccc1C(=O)O[H])(C)C
A602	*C(=O)c1ccc2c(-c3c4ccccc4cc4cc(C(=O)O[H])ccc34)c3ccccc3cc2c1
A603	*C(=O)c1ccc2c(-c3c4ccccc4cc4ccccc34)c3ccc(C(=O)O[H])cc3cc2c1
A604	*C(=O)c1cccc2c(-c3c4ccccc4cc4ccccc34)c3cccc(C(=O)O[H])c3cc12
A605	*C(=O)c1cccc2c(-c3c4ccccc4cc4c(C(=O)O[H])cccc34)c3ccccc3cc12
A606	*C(=O)c1c2ccccc2c(-c2c3ccccc3c(C(=O)O[H])c3ccccc23)c2ccccc12
A607	*C(=O)c1ccc2cc3ccccc3c(-c3c4ccccc4cc4ccc(C(=O)O[H])cc34)c2c1
A608	*C(=O)c1cccc2cc3ccccc3c(-c3c4ccccc4cc4cccc(C(=O)O[H])c34)c12
A609	*C(=O)c1ccc2cc3ccc(C(=O)O[H])cc3c(-c3c4ccccc4cc4ccccc34)c2c1
A610	*C(=O)c1cccc2cc3cccc(C(=O)O[H])c3c(-c3c4ccccc4cc4ccccc34)c12
A611	*C(=O)CC(=C(C)CC)CC(=O)O[H]
A612	*C(=O)CC(C)(CC(=O)O[H])C(C)CC
A613	*C(=O)CC(C)(CC(=O)O[H])CC(C)CC(C)(C)C
A614	*C(=O)C(C(C)C(C(=O)O[H])C(C)(C)C)C(C)(C)C
A615	*C(=O)CC(C)(C)CC(C)CC(C)(C)CC(=O)O[H]
A616	*C(=O)CCCC1CCCCC1CCCC(=O)O[H]
A617	*C(=O)C(C)CC1CCCCC1CC(C(=O)O[H])C
A618	*C(=O)C(CC)C1CCCCC1C(C(=O)O[H])CC
A619	*C(=O)C1CCC(C(=O)O[H])C(CCC)C1CCC
A620	*C(=O)CC(C=C(C(C)C)C(C)(C)C)CC(=O)O[H]
A621	*C(=O)CC(C(=CC(C)C)C(C)(C)C)CC(=O)O[H]
A622	*C(=O)CC(C(=CC(C)C)C(C)C)(C)CC(=O)O[H]
A623	*C(=O)CC1(CC(=O)O[H])C(CC)=C(C)CCC1
A624	*C(=O)c1cc(CC)c(C(=O)O[H])cc1CC
A625	*C(=O)C(c1ccc(C(C(=O)O[H])C)cc1)C
A626	*C(=O)CCc1ccc(CCC(=O)O[H])cc1
A627	*C(=O)C=Cc1ccc(C=CC(=O)O[H])cc1
A628	*C(=O)C(=C)c1ccc(C(C(=O)O[H])=C)cc1
A629	*C(=O)c1cc(C=C)c(C(=O)O[H])cc1C=C
A630	*C(=O)SCc1ccc(CSC(=O)O[H])cc1
A631	*C(=O)C(S)c1ccc(C(S)C(=O)O[H])cc1
A632	*C(=O)c1cc(CS)c(C(=O)O[H])cc1CS
A633	*C(=O)C(N(CCC(=C)C)C(C(=O)O[H])C)C
A634	*C(=O)CCN(CCC(=O)O[H])CCC(=C)C
A635	*C(=O)CC(CC(=O)O[H])CCC
A636	*C(=O)CCCC(=O)CCCC(=O)O[H]
A637	*C(=O)C(C)CC(=O)CC(C(=O)O[H])C
A638	*C(=O)C(C(=O)C(C(=O)O[H])CC)CC
A639	*C(=O)N(C(=S)N(C(=O)O[H])CC)CC
A640	*C(=O)C(NC(=S)NC(C(=O)O[H])C)C
A641	*C(=O)CCNC(=S)NCCC(=O)O[H]
A642	*C(=O)C(N(C)C(C(=O)O[H])C)C
A643	*C(=O)CCN(C)CCC(=O)O[H]
A644	*C(=O)C(OC(=S)SSC(=S)OC(C(=O)O[H])(C)C)(C)C
A645	*C(=O)c1cc(C(=O)O[H])c(C)cc1C
A646	*C(=O)Cc1cccc(CC(=O)O[H])c1
A647	*C(=O)CCCCCCCCC(=O)O[H]
A648	*C(=O)C(C)CCCCC(C(=O)O[H])C
A649	*C(=O)C(CC)CCC(C(=O)O[H])CC
A650	*C(=O)CCCCCCCCCCCCCCCCCCCCCCC(=O)O[H]
A651	*C(=O)C(C)CCCCCCCCCCCCCCCCCCC(C(=O)O[H])C
A652	*C(=O)C(CC)CCCCCCCCCCCCCCCCC(C(=O)O[H])CC
A653	*C(=O)C(CCC)CCCCCCCCCCCCCCC(C(=O)O[H])CCC
A654	*C(=O)C(CCCC)CCCCCCCCCCCCC(C(=O)O[H])CCCC
A655	*C(=O)C(CCCCC)CCCCCCCCCCC(C(=O)O[H])CCCCC
A656	*C(=O)C(CCCCCC)CCCCCCCCC(C(=O)O[H])CCCCCC
A657	*C(=O)C(CCCCCCC)CCCCCCC(C(=O)O[H])CCCCCCC
A658	*C(=O)C(C=CC(C(=O)O[H])CCC)CCC
A659	*C(=O)C(CC=CCC(C(=O)O[H])CC)CC
A660	*C(=O)C(C)CCC=CCCC(C(=O)O[H])C
A661	*C(=O)CCCCC=CCCCCC(=O)O[H]
A662	*C(=O)CC(C)CCCCCCCCCC(C)CC(=O)O[H]
A663	*C(=O)C(C)(C)CCCCCCCCCC(C(=O)O[H])(C)C
A664	*C(=O)C(CCCCCCCC(C(=O)O[H])C(C)C)C(C)C
A665	*C(=O)C(CCCCCC(C(=O)O[H])CC(C)C)CC(C)C
A666	*C(=O)C(CCCC(C(=O)O[H])CCC(C)C)CCC(C)C
A667	*C(=O)C(OC(OC(C(=O)O[H])CC)C)CC
A668	*C(=O)C(C)COC(OCC(C(=O)O[H])C)C
A669	*C(=O)CCCOC(OCCCC(=O)O[H])C
A670	*C(=O)C(N(C)C(C(=O)O[H])CC)CC
A671	*C(=O)C(C)CN(C)CC(C(=O)O[H])C
A672	*C(=O)CCCN(C)CCCC(=O)O[H]
A673	*C(=O)SC(=O)CCCCC(=O)SC(=O)O[H]
A674	*C(=O)CC(C#CC)CC(=O)O[H]
A675	*C(=O)CC(CC(=O)O[H])CCC(C)C(C)(C)C
A676	*C(=O)CC(C)(CC(=O)O[H])C(C)CCC(C)C
A677	*C(=O)CC(CC(=O)O[H])CC(C)CC(C)(C)C
A678	*C(=O)CC(C)(CC(=O)O[H])CC(C)CC(C)C
A679	*C(=O)CC(C)(CC(=O)O[H])CCC(C)(C)CC
A680	*C(=O)CC(CC(=O)O[H])(CC)CCC(C)(C)C
A681	*C(=O)CS(C#C)(C)CC(=O)O[H]
A682	*C(=O)CCN(CCC(=O)O[H])C1CCCCC1C
A683	*C(=O)C(N(C(C(=O)O[H])C)C1CCCCC1C)C
A684	*C(=O)CCC(C)(CC)CCC(=O)O[H]
A685	*C(=O)C(C)C(C)(CC)C(C(=O)O[H])C
A686	*C(=O)COS(OCC(=O)O[H])(C)CCC
A687	*C(=O)CCCOS(OCCC)(OCCCC(=O)O[H])C=C
A688	*C(=O)CCCC(C)(C)CCCC(=O)O[H]
A689	*C(=O)C(C)CC(C)(C)CC(C(=O)O[H])C
A690	*C(=O)C(CC)C(C)(C)C(C(=O)O[H])CC
A691	*C(=O)CC(CC(=O)O[H])(CCC)CCC
A692	*C(=O)C(C)(C)C(CC)C(C(=O)O[H])(C)C
A693	*C(=O)CC(CC(=O)O[H])C(CC)C(C)C
A694	*C(=O)CC(C)C(CC)C(C)CC(=O)O[H]
A695	*C(=O)C(C)C(NC(=O)C)C(C(=O)O[H])C
A696	*C(=O)CCC(NC(=O)C)CCC(=O)O[H]
A697	*C(=O)CC(CC(=O)O[H])CC(C)C(C)C
A698	*C(=O)CC(CC(=O)O[H])C(C)CC(C)C
A699	*C(=O)CCCCCCCCCCCCCCCCCCCCCCCCCC(=O)O[H]
A700	*C(=O)C(C)CCCCCCCCCCCCCCCCCCCCCC(C(=O)O[H])C
A701	*C(=O)C(CC)CCCCCCCCCCCCCCCCCCCC(C(=O)O[H])CC
A702	*C(=O)C(CCC)CCCCCCCCCCCCCCCCCC(C(=O)O[H])CCC
A703	*C(=O)C(CCCC)CCCCCCCCCCCCCCCC(C(=O)O[H])CCCC
A704	*C(=O)C(CCCCC)CCCCCCCCCCCCCC(C(=O)O[H])CCCCC
A705	*C(=O)C(CCCCCC)CCCCCCCCCCCC(C(=O)O[H])CCCCCC
A706	*C(=O)C(CCCCCCC)CCCCCCCCCC(C(=O)O[H])CCCCCCC
A707	*C(=O)C(CCCCCCCC)CCCCCCCC(C(=O)O[H])CCCCCCCC
A708	*C(=O)CCCCCCCCCCC(=O)O[H]
A709	*C(=O)C(C)CCCCCCC(C(=O)O[H])C
A710	*C(=O)C(CC)CCCCC(C(=O)O[H])CC
A711	*C(=O)C(CCC)CCC(C(=O)O[H])CCC
A712	*C(=O)C(CNCC(C(=O)O[H])(CC)CCCC)(CC)CCCC
A713	*C(=O)C(C)C(CNCC(CCCC)C(C(=O)O[H])C)CCCC
A714	*C(=O)CCC(CNCC(CCC(=O)O[H])CCCC)CCCC
A715	*C(=O)C(CCC)C(CNCC(CC)C(C(=O)O[H])CCC)CC
A716	*C(=O)C(CC)CC(CNCC(CC)CC(C(=O)O[H])CC)CC
A717	*C(=O)C(C)CCC(CNCC(CC)CCC(C(=O)O[H])C)CC
A718	*C(=O)CCCCC(CNCC(CC)CCCCC(=O)O[H])CC
A719	*C(=O)CC(=CCCC(C)C)CC(=O)O[H]
A720	*C(=O)CC(CC(=O)O[H])CCC=C(C)C
A721	*C(=O)CC(=CCCC(=C)C)CC(=O)O[H]
A722	*C(=O)CC(CC(=O)O[H])CCCCC
A723	*C(=O)CCCCCCCCCC(=O)O[H]
A724	*C(=O)C(C)CCCCCC(C(=O)O[H])C
A725	*C(=O)C(CC)CCCC(C(=O)O[H])CC
A726	*C(=O)c1cc(C)cc(C(=O)O[H])c1S
A727	*C(=O)c1cc(S)cc(C(=O)O[H])c1C
A728	*C(=O)C1N(C)C(C(=O)O[H])CCC1
A729	*C(=O)C1CN(C)CC(C(=O)O[H])C1
A730	*C(=O)c1cccc(C(=O)O[H])c1S
A731	*C(=O)c1cc(S)cc(C(=O)O[H])c1
A732	*C(=O)N1CC(C)N(C(=O)O[H])CC1C
A733	*C(=O)CC1NCC(CC(=O)O[H])NC1
A734	*C(=O)N1C(=O)CN(C(=O)O[H])C(=O)C1
A735	*C(=O)C1C(=O)NC(C(=O)O[H])C(=O)N1
A736	*C(=O)CN1CCN(CC(=O)O[H])CC1
A737	*C(=O)C1N(C)CC(C(=O)O[H])N(C)C1
A738	*C(=O)C1N(C)C(C(=O)O[H])CN(C)C1
A739	*C(=O)CC(OCCC)CC(=O)O[H]
A740	*C(=O)CC(CC(=O)O[H])CC=C
A741	*C(=O)CN(CC)CCN(CC(=O)O[H])CC
A742	*C(=O)C(N(C)CCN(C)C(C(=O)O[H])C)C
A743	*C(=O)CCN(C)CCN(C)CCC(=O)O[H]
A744	*C(=O)CC(CC(=O)O[H])CC(C)CC
A745	*C(=O)CCCCCCCC(=O)O[H]
A746	*C(=O)C(C)CCCC(C(=O)O[H])C
A747	*C(=O)C(CC)CC(C(=O)O[H])CC
A748	*C(=O)CCCCCCCCCCN(CCCCCCCCCC)CCCCCCCCCCC(=O)O[H]
A749	*C(=O)C(CCCN(CCCCCCCCCC)CCCC(C(=O)O[H])CCCCCC)CCCCCC
A750	*C(=O)C(CCCCN(CCCCCCCCCC)CCCCC(C(=O)O[H])CCCCC)CCCCC
A751	*C(=O)C(CCCC)CCCCCN(CCCCCCCCCC)CCCCCC(C(=O)O[H])CCCC
A752	*C(=O)C(CCC)CCCCCCN(CCCCCCCCCC)CCCCCCC(C(=O)O[H])CCC
A753	*C(=O)C(CC)CCCCCCCN(CCCCCCCCCC)CCCCCCCC(C(=O)O[H])CC
A754	*C(=O)C(C)CCCCCCCCN(CCCCCCCCCC)CCCCCCCCC(C(=O)O[H])C
A755	*C(=O)CCCCCCCCCCCCCCCCCCCCCCCCCCCCCCCC(=O)O[H]
A756	*C(=O)C(CCCCCCCCC)CCCCCCCCCCCC(C(=O)O[H])CCCCCCCCC
A757	*C(=O)C(CCCCCCCCCC)CCCCCCCCCC(C(=O)O[H])CCCCCCCCCC
A758	*C(=O)C(C)CCCCCCCCCCCCCCCCCCCCCCCCCCCC(C(=O)O[H])C
A759	*C(=O)C(CC)CCCCCCCCCCCCCCCCCCCCCCCCCC(C(=O)O[H])CC
A760	*C(=O)C(CCC)CCCCCCCCCCCCCCCCCCCCCCCC(C(=O)O[H])CCC
A761	*C(=O)C(CCCC)CCCCCCCCCCCCCCCCCCCCCC(C(=O)O[H])CCCC
A762	*C(=O)C(CCCCC)CCCCCCCCCCCCCCCCCCCC(C(=O)O[H])CCCCC
A763	*C(=O)C(CCCCCC)CCCCCCCCCCCCCCCCCC(C(=O)O[H])CCCCCC
A764	*C(=O)C(CCCCCCC)CCCCCCCCCCCCCCCC(C(=O)O[H])CCCCCCC
A765	*C(=O)C(CCCCCCCC)CCCCCCCCCCCCCC(C(=O)O[H])CCCCCCCC
A766	*C(=O)CC(C)(CC(=O)O[H])CC(C)(C)C
A767	*C(=O)CC(C)(C)CC(C)(C)CC(=O)O[H]
A768	*C(=O)CC(C)(CC(=O)O[H])CCCCC
A769	*C(=O)CC(C)(C)CCCCC(C)(C)CC(=O)O[H]
A770	*C(=O)C(CCC(C(=O)O[H])C(C)(C)C)C(C)(C)C
A771	*C(=O)CC(C)(C)CCC(C)(C)CC(=O)O[H]
A772	*C(=O)CC(C)(CC(=O)O[H])CCC(C)(C)C
A773	*C(=O)C(=O)CCCCC(=O)C(=O)O[H]
A774	*C(=O)C1N(C)C1C(=O)O[H]
A775	*C(=O)C1N(CC)C1C(=O)O[H]
A776	*C(=O)C1C(=O)C(C(=O)O[H])CSC1
A777	*C(=O)C1CC(C(=O)O[H])C1C=C
A778	*C(=O)CC1(CC(=O)O[H])OOC(C)(C)OO1
A779	*C(=O)CC1(C)OOC(C)(CC(=O)O[H])OO1
A780	*C(=O)CC(c1ccccc1C)(C)CC(=O)O[H]
A781	*C(=O)c1ccc(C(=O)O[H])c2c1CCCCC2
A782	*C(=O)C1c2ccccc2C(C(=O)O[H])CCC1
A783	*C(=O)C1Cc2ccccc2CC(C(=O)O[H])C1
A784	*C(=O)c1c(C)c(C)c(C(=O)O[H])c2c1CCC2
A785	*C(=O)Cc1cc2c(cc1CC(=O)O[H])CCC2
A786	*C(=O)C1c2cc(C)c(C)cc2C(C(=O)O[H])C1
A787	*C(=O)CC(c1cccc(C)c1)(C)CC(=O)O[H]
A788	*C(=O)c1ccc(C(=O)O[H])c2c1C=C2
A789	*C(=O)c1c(C)c(C)c(C(=O)O[H])c2c1CCCC2
A790	*C(=O)Cc1cc2c(cc1CC(=O)O[H])CCCC2
A791	*C(=O)C1c2cc(C)c(C)cc2C(C(=O)O[H])CC1
A792	*C(=O)CC1(CC(=O)O[H])c2c(C)ccc(C)c2CC1
A793	*C(=O)CC(C)(C)C1CCCC(C(C)(C)CC(=O)O[H])C1
A794	*C(=O)CC(C)(CC(=O)O[H])C1CCCC(C(C)(C)C)C1
A795	*C(=O)C1(C(C)(C)C)CCCC(C(=O)O[H])(C(C)(C)C)C1
A796	*C(=O)c1ccc(Pc2ccc(C(=O)O[H])cc2)cc1
A797	*C(=O)c1cccc(Pc2cccc(C(=O)O[H])c2)c1
A798	*C(=O)c1ccccc1Pc1ccccc1C(=O)O[H]
A799	*C(=O)c1c2c(c(C(=O)O[H])c3c1CCCC3)CCCC2
A800	*C(=O)C1c2cc3c(cc2CCC1)CCCC3C(=O)O[H]
A801	*C(=O)C1c2cc3c(cc2CCC1)C(C(=O)O[H])CCC3
A802	*C(=O)C1c2cc3c(cc2C(C(=O)O[H])CC1)CCCC3
A803	*C(=O)C1Cc2cc3c(cc2CC1)CC(C(=O)O[H])CC3
A804	*C(=O)C1Cc2cc3c(cc2CC1)CCC(C(=O)O[H])C3
A805	*C(=O)CC(C)(CC(=O)O[H])CC(=C)C
A806	*C(=O)CC(=CC(C)(C)C)CC(=O)O[H]
A807	*C(=O)CC(C=C(C)C)(C)CC(=O)O[H]
A808	*C(=O)CC(CC(=O)O[H])CC(C)(C)C
A809	*C(=O)CC(C)(CC(=O)O[H])CC(C)C
A810	*C(=O)CS(OS(C)(C)CC(=O)O[H])(C)C
A811	*C(=O)CS(OS(C)(C)C)(C)CC(=O)O[H]
A812	*C(=O)CC(SC(C)(C)CC(=O)O[H])(C)C
A813	*C(=O)CC(SC(C)(C)C)(C)CC(=O)O[H]
A814	*C(=O)CCOP(=O)(OCCC(=O)O[H])OP(=O)(OCC)CC
A815	*C(=O)CS(OS(C)(C)C)(OS(C)(C)C)CC(=O)O[H]
A816	*C(=O)CS(OS(OS(C)(C)C)(C)C)(C)CC(=O)O[H]
A817	*C(=O)CS(OS(OS(C)(C)CC(=O)O[H])(C)C)(C)C
A818	*C(=O)CC(CC(=O)O[H])CC(C#C)C
A819	*C(=O)CC(NC(=O)C=C)(C)CC(=O)O[H]
A820	*C(=O)C1C(C(=O)O[H])CS(=O)(=O)C1
A821	*C(=O)CC(C)(CC(=O)O[H])CC(=O)C
A822	*C(=O)CC(CC(=O)O[H])CCCC(C)C
A823	*C(=O)CC(C)CCCC(C)CC(=O)O[H]
A824	*C(=O)C(C)(C)CCCC(C(=O)O[H])(C)C
A825	*C(=O)C(CC(C(=O)O[H])C(C)C)C(C)C
A826	*C(=O)CC(CC(=O)O[H])CC
A827	*C(=O)CC(=C)CC(=O)O[H]
A828	*C(=O)CNCC(=O)O[H]
A829	*C(=O)c1sc(-c2sc(-c3sc(C(=O)O[H])cc3)cc2)cc1
A830	*C(=O)c1csc(-c2sc(-c3scc(C(=O)O[H])c3)cc2)c1
A831	*C(=O)c1c(-c2sc(-c3sccc3C(=O)O[H])cc2)scc1
A832	*C(=O)C(C)CC(Cc1ccccc1)CC(C(=O)O[H])C
A833	*C(=O)CCCC(Cc1ccccc1)CCCC(=O)O[H]
A834	*C(=O)CCCC1(CCCC(=O)O[H])CCCCC1
A835	*C(=O)C(C)CC1(CC(C(=O)O[H])C)CCCCC1
A836	*C(=O)C(CC)C1(C(C(=O)O[H])CC)CCCCC1
A837	*C(=O)C1CCCC(C(=O)O[H])C1(CCC)CCC
A838	*C(=O)C1CC(C(=O)O[H])CC(CCC)(CCC)C1
A839	*C(=O)C1(c2ccc(C3(C(=O)O[H])CCCCC3)cc2)CCCCC1
A840	*C(=O)C1CCCCC1c1ccc(C2CCCCC2C(=O)O[H])cc1
A841	*C(=O)C1CCCC(c2ccc(C3CCCC(C(=O)O[H])C3)cc2)C1
A842	*C(=O)C1CCC(c2ccc(C3CCC(C(=O)O[H])CC3)cc2)CC1
A843	*C(=O)c1ccc(CCCCCCc2ccc(C(=O)O[H])cc2)cc1
A844	*C(=O)c1ccccc1CCCCCCc1ccccc1C(=O)O[H]
A845	*C(=O)c1cccc(CCCCCCc2cccc(C(=O)O[H])c2)c1
A846	*C(=O)C(c1ccccc1)CCCCC(C(=O)O[H])c1ccccc1
A847	*C(=O)CN(CC(=O)O[H])CC
A848	*C(=O)CN(CC(=O)O[H])CCS
A849	*C(=O)CC(CC(=O)O[H])CC(C)C
A850	*C(=O)CC(C)CC(C)CC(=O)O[H]
A851	*C(=O)C(C)(C)CC(C(=O)O[H])(C)C
A852	*C(=O)CC(CC(=O)O[H])CC(=O)C
A853	*C(=O)CC(C)CC(=O)O[H]
A854	*C(=O)CN(CC(=O)O[H])CCC
A855	*C(=O)C(NC(C(=O)O[H])(C)C)(C)C
A856	*C(=O)CC(NC(C)C)CC(=O)O[H]
A857	*C(=O)CC(NC(C)CC(=O)O[H])C
A858	*C(=O)CC(OC(C)CC(=O)O[H])C
A859	*C(=O)CC(OC(C)C)CC(=O)O[H]
A860	*C(=O)C(OC(C(=O)O[H])(C)C)(C)C
A861	*C(=O)C1C(C(=O)O[H])C1C
A862	*C(=O)C1C(=O)C1C(=O)O[H]
A863	*C(=O)c1c(C)nc(C)c(C(=O)O[H])c1
A864	*C(=O)Cc1nc(CC(=O)O[H])ccc1
A865	*C(=O)CC1NC(CC(=O)O[H])CNC1
A866	*C(=O)C1C(=O)C(C(=O)O[H])C1
A867	*C(=O)C=Cc1cccc(C=CC(=O)O[H])c1
A868	*C(=O)C(=C)c1cccc(C(C(=O)O[H])=C)c1
A869	*C(=O)c1cc(C(=O)O[H])c(C=C)cc1C=C
A870	*C(=O)CN1CN(C)CN(CC(=O)O[H])C1
A871	*C(=O)c1c(C)nc(C)c(C(=O)O[H])c1C
A872	*C(=O)Cc1nc(CC(=O)O[H])cc(C)c1
A873	*C(=O)c1ncnc(C(=O)O[H])n1
A874	*C(=O)CC(C)CC(=O)CC(C)CC(=O)O[H]
A875	*C(=O)CC(CC(=O)O[H])CC(=O)CC(C)C
A876	*C(=O)C(C)(C)CC(=O)CC(C(=O)O[H])(C)C
A877	*C(=O)C(C(=O)C(C(=O)O[H])C(C)C)C(C)C
A878	*C(=O)c1nc(C(=O)O[H])cc(C)c1
A879	*C(=O)c1cncc(C(=O)O[H])c1C
A880	*C(=O)C1C(=O)C(C(=O)O[H])CCC1
A881	*C(=O)C1CC(=O)CC(C(=O)O[H])C1
A882	*C(=O)c1c2c(c(C(=O)O[H])c3ccccc13)C(=O)c1ccccc1C2=O
A883	*C(=O)c1ccc(C(=O)O[H])c2cc3c(cc12)C(=O)c1ccccc1C3=O
A884	*C(=O)c1ccc(C(=O)O[H])c2c1C(=O)c1c(cc3ccccc3c1)C2=O
A885	*C(=O)COP(=O)(OCC(=O)O[H])CCCCCCCCCCC
A886	*C(=O)c1cc(C(c2ccc(C)c(C(=O)O[H])c2)(C)CC)ccc1C
A887	*C(=O)c1cc(C)ccc1C(c1ccc(C)cc1C(=O)O[H])(C)CC
A888	*C(=O)Cc1ccc(C(c2ccc(CC(=O)O[H])cc2)(C)CC)cc1
A889	*C(=O)c1cccc2c(-c3ccccc3)c3cccc(C(=O)O[H])c3nc12
A890	*C(=O)c1cccc2nc3cccc(C(=O)O[H])c3c(-c3ccccc3)c12
A891	*C(=O)c1ccc2nc3ccc(C(=O)O[H])cc3c(-c3ccccc3)c2c1
A892	*C(=O)c1ccc2c(-c3ccccc3)c3ccc(C(=O)O[H])cc3nc2c1
A893	*C(=O)c1cc(C(c2ccc(C)c(C(=O)O[H])c2)(C)C)ccc1C
A894	*C(=O)c1cc(C)ccc1C(c1ccc(C)cc1C(=O)O[H])(C)C
A895	*C(=O)Cc1ccc(C(c2ccc(CC(=O)O[H])cc2)(C)C)cc1
A896	*C(=O)c1ccc(C(=O)O[H])c2c(CC(C)C)ccc(CC(C)C)c12
A897	*C(=O)C(c1ccc(C(C(=O)O[H])C(C)C)c2ccccc12)C(C)C
A898	*C(=O)C(C)(C)Cc1ccc(CC(C(=O)O[H])(C)C)c2ccccc12
A899	*C(=O)CC(C)Cc1ccc(CC(C)CC(=O)O[H])c2ccccc12
A900	*C(=O)C1NC(C(=O)O[H])CN(C)C1
A901	*C(=O)C1N(C)C(C(=O)O[H])CNC1
A902	*C(=O)C1N(C)C(C(=O)O[H])CC1
A903	*C(=O)C1CN(C)CC1C(=O)O[H]
A904	*C(=O)c1ncnc(C(=O)O[H])c1
A905	*C(=O)CCCCCCCCCCCCCCCCC(=O)O[H]
A906	*C(=O)C(C)CCCCCCCCCCCCC(C(=O)O[H])C
A907	*C(=O)C(CC)CCCCCCCCCCC(C(=O)O[H])CC
A908	*C(=O)C(CCC)CCCCCCCCC(C(=O)O[H])CCC
A909	*C(=O)C(CCCC)CCCCCCC(C(=O)O[H])CCCC
A910	*C(=O)C(CCCCC)CCCCC(C(=O)O[H])CCCCC
A911	*C(=O)C(NC(=S)NC(C(=O)O[H])CCC)CCC
A912	*C(=O)C(CNC(=S)NCC(C(=O)O[H])CC)CC
A913	*C(=O)C(C)CCNC(=S)NCCC(C(=O)O[H])C
A914	*C(=O)CCCCNC(=S)NCCCCC(=O)O[H]
A915	*C(=O)CC(NCC)CC(=O)O[H]
A916	*C(=O)CCCCC(=O)O[H]
A917	*C(=O)C(C)C(C(=O)O[H])C
A918	*C(=O)SCCCSC(=O)O[H]
A919	*C(=O)C(S)CC(S)C(=O)O[H]
A920	*C(=O)CCC(=O)O[H]
A921	*C(=O)C(NC(C(=O)O[H])C)C
A922	*C(=O)CCNCCC(=O)O[H]
A923	*C(=O)C1=C(C(=O)O[H])CNC1
A924	*C(=O)C1CCC1C(=O)O[H]
A925	*C(=O)C1CC(C(=O)O[H])C1
A926	*C(=O)C(CC)CC(COc1ccc(OCC(CC)CC(C(=O)O[H])CC)cc1)CC
A927	*C(=O)C(C)CCC(COc1ccc(OCC(CC)CCC(C(=O)O[H])C)cc1)CC
A928	*C(=O)CCCCC(COc1ccc(OCC(CC)CCCCC(=O)O[H])cc1)CC
A929	*C(=O)C(Oc1ccc(OC(C(=O)O[H])C(CC)CCCC)cc1)C(CC)CCCC
A930	*C(=O)C(COc1ccc(OCC(C(=O)O[H])(CC)CCCC)cc1)(CC)CCCC
A931	*C(=O)C(C)C(COc1ccc(OCC(CCCC)C(C(=O)O[H])C)cc1)CCCC
A932	*C(=O)CCC(COc1ccc(OCC(CCC(=O)O[H])CCCC)cc1)CCCC
A933	*C(=O)C(CCC)C(COc1ccc(OCC(CC)C(C(=O)O[H])CCC)cc1)CC
A934	*C(=O)C1CCCC(CC(C)(CC(C)C)CC2CCCC(C(=O)O[H])C2)C1
A935	*C(=O)C1CCC(CC(C)(CC(C)C)CC2CCC(C(=O)O[H])CC2)CC1
A936	*C(=O)C1CCCCC1CC(C)(CC(C)C)CC1CCCCC1C(=O)O[H]
A937	*C(=O)C1(CC(C)(CC(C)C)CC2(C(=O)O[H])CCCCC2)CCCCC1
A938	*C(=O)CC(CC(=O)O[H])CCC(C)C
A939	*C(=O)CC(C)CCC(C)CC(=O)O[H]
A940	*C(=O)C(C)(C)CCC(C(=O)O[H])(C)C
A941	*C(=O)CC(OOC(C)(C)C)(C)CC(=O)O[H]
A942	*C(=O)CC(OOC(C)(C)CC(=O)O[H])(C)C
A943	*C(=O)CC(SSC(C)(C)C)(C)CC(=O)O[H]
A944	*C(=O)CC(SSC(C)(C)CC(=O)O[H])(C)C
A945	*C(=O)CC(CC(=O)O[H])CCC(=O)C
A946	*C(=O)CC(=O)CCC(=O)CC(=O)O[H]
A947	*C(=O)CN(CC(=O)O[H])CCN(C)C
A948	*C(=O)CN(C)CCN(C)CC(=O)O[H]
A949	*C(=O)CCCCCCCCCCCC(=O)O[H]
A950	*C(=O)C(C)CCCCCCCC(C(=O)O[H])C
A951	*C(=O)C(CC)CCCCCC(C(=O)O[H])CC
A952	*C(=O)C(CCC)CCCC(C(=O)O[H])CCC
A953	*C(=O)CC(CC(=O)O[H])CCN=O
A954	*C(=O)CCCCCC(=O)O[H]
A955	*C(=O)C(C)CC(C(=O)O[H])C
A956	*C(=O)C(=C(C(=O)O[H])C)C
A957	*C(=O)CC=CCC(=O)O[H]
A958	*C(=O)CC#CCC(=O)O[H]
A959	*C(=O)N(C)CCN(C(=O)O[H])C
A960	*C(=O)CNCCNCC(=O)O[H]
A961	*C(=O)CCSCCC(=O)O[H]
A962	*C(=O)C(SC(C(=O)O[H])C)C
A963	*C(=O)CCSSCCC(=O)O[H]
A964	*C(=O)C(SSC(C(=O)O[H])C)C
A965	*C(=O)N1CCN(C(=O)O[H])CC1
A966	*C(=O)C1NCCNC1C(=O)O[H]
A967	*C(=O)C1NCC(C(=O)O[H])NC1
A968	*C(=O)C1NC(C(=O)O[H])CNC1
A969	*C(=O)C1=C(C(=O)O[H])CCC1
A970	*C(=O)C1C=CC(C(=O)O[H])C1
A971	*C(=O)C1NC(C(=O)O[H])CCC1
A972	*C(=O)C1CNCC(C(=O)O[H])C1
A973	*C(=O)CC(=CCCC(=O)C)CC(=O)O[H]
A974	*C(=O)CN(CC(=O)O[H])CCCN(C)C
A975	*C(=O)CN(C)CCCN(C)CC(=O)O[H]
A976	*C(=O)C(N(C)C)CC(C(=O)O[H])N(C)C
A977	*C(=O)C(NC(C(=O)O[H])C(C)C)C(C)C
A978	*C(=O)C(C)(C)CNCC(C(=O)O[H])(C)C
A979	*C(=O)CC(CC(=O)O[H])CNCC(C)C
A980	*C(=O)CC(C)CNCC(C)CC(=O)O[H]
A981	*C(=O)C(NC(C(=O)O[H])CC)CC
A982	*C(=O)C(C)CNCC(C(=O)O[H])C
A983	*C(=O)CCCNCCCC(=O)O[H]
A984	*C(=O)CCCCCCC(=O)O[H]
A985	*C(=O)C(C)CCC(C(=O)O[H])C
A986	*C(=O)CS(OC)(C)CC(=O)O[H]
A987	*C(=O)CCC(C=CC=C)(CC)CCC(=O)O[H]
A988	*C(=O)CC(C(=CC(=C)C)C)(C)CC(=O)O[H]
A989	*C(=O)C=CCS(C)(C)CC=CC(=O)O[H]
A990	*C(=O)C(=C)CS(C)(C)CC(C(=O)O[H])=C
A991	*C(=O)CS(CC(=O)O[H])(CC=C)CC=C
A992	*C(=O)CC(=O)N(C(=O)CC(=O)O[H])C
A993	*C(=O)CCCC(CC)CCCC(=O)O[H]
A994	*C(=O)C(C)CC(CC)CC(C(=O)O[H])C
A995	*C(=O)C(CC)C(CC)C(C(=O)O[H])CC
A996	*C(=O)C(OC(OC(C(=O)O[H])C)(n1cncc1)C)C
A997	*C(=O)CCOC(OCCC(=O)O[H])(n1cncc1)C
A998	*C(=O)COC(OCC(=O)O[H])(c1ccccc1)n1cncc1
A999	*C(=O)C(N(C(=O)CC)C(C(=O)O[H])C)C
A1000	*C(=O)CCN(C(=O)CC)CCC(=O)O[H]
A1001	*C(=O)CCN(C(=O)CCC)CCC(=O)O[H]
A1002	*C(=O)C(N(C(=O)CCC)C(C(=O)O[H])C)C
A1003	*C(=O)C=CC(C=CC(=O)O[H])C
A1004	*C(=O)C(=C)C(C(C(=O)O[H])=C)C
A1005	*C(=O)CC(=CC(=C)C(C)(C)C)CC(=O)O[H]
A1006	*C(=O)CC(C(=C)C=C(C)C)(C)CC(=O)O[H]
A1007	*C(=O)C(N(C(=O)C)C(C(=O)O[H])CC)CC
A1008	*C(=O)C(C)CN(C(=O)C)CC(C(=O)O[H])C
A1009	*C(=O)CCCN(C(=O)C)CCCC(=O)O[H]
A1010	*C(=O)CC(C)CN(CC(C)C)CC(C)CC(=O)O[H]
A1011	*C(=O)CC(CC(=O)O[H])CN(CC(C)C)CC(C)C
A1012	*C(=O)C(C)(C)CN(CC(C)C)CC(C(=O)O[H])(C)C
A1013	*C(=O)C(N(CC(C)C)C(C(=O)O[H])C(C)C)C(C)C
A1014	*C(=O)CCCCCCCCN(CCCCCCCC)CCCCCCCCC(=O)O[H]
A1015	*C(=O)C(CCN(CCCCCCCC)CCC(C(=O)O[H])CCCCC)CCCCC
A1016	*C(=O)C(CCCN(CCCCCCCC)CCCC(C(=O)O[H])CCCC)CCCC
A1017	*C(=O)C(CCC)CCCCN(CCCCCCCC)CCCCC(C(=O)O[H])CCC
A1018	*C(=O)C(CC)CCCCCN(CCCCCCCC)CCCCCC(C(=O)O[H])CC
A1019	*C(=O)C(C)CCCCCCN(CCCCCCCC)CCCCCCC(C(=O)O[H])C
A1020	*C(=O)C(C(=C)C(C(=O)O[H])(C)C)(C)C
A1021	*C(=O)CC(C(=C)C(C)C)CC(=O)O[H]
A1022	*C(=O)CC(C(=C)C(C)CC(=O)O[H])C
A1023	*C(=O)CS(N=C=O)(C)CC(=O)O[H]
A1024	*C(=O)CC(NC=O)(C)CC(=O)O[H]
A1025	*C(=O)CC(NC(=O)C)CC(=O)O[H]
A1026	*C(=O)CC(C(=O)CC(=O)C(C)(C)C)(C)CC(=O)O[H]
A1027	*C(=O)CC(C(=O)CC(=O)C(C)(C)CC(=O)O[H])(C)C
A1028	*C(=O)COc1nc(NC(=O)NS(=O)(=O)c2ncccc2C(=O)N(C)C)nc(OCC(=O)O[H])c1
A1029	*C(=O)CC(C)CCCC(C)CCCC(C)CCCCC(C)CCCC(C)CCCC(C)CC(=O)O[H]
A1030	*C(=O)C(CC(C)CCCCC(C)CC(C(=O)O[H])CC(C)CCCC(C)C)CC(C)CCCC(C)C
A1031	*C(=O)CC(CCCCC(CC(=O)O[H])CCCC(C)CCCC(C)C)CCCC(C)CCCC(C)C
A1032	*C(=O)C(C)(C)CCCC(C)CCCC(C)CCCCC(C)CCCC(C)CCCC(C(=O)O[H])(C)C
A1033	*C(=O)C(CCC(C)CCCC(C)CCCCC(C)CCCC(C)CCC(C(=O)O[H])C(C)C)C(C)C
A1034	*C(=O)C(CC(C)C)CC(C)CCCC(C)CCCCC(C)CCCC(C)CC(C(=O)O[H])CC(C)C
A1035	*C(=O)C(C)(CCCC(C)C)CCCC(C)CCCCC(C)CCCC(C(=O)O[H])(C)CCCC(C)C
A1036	*C(=O)CC(CCCC(C)C)CCCC(C)CCCCC(C)CCCC(CC(=O)O[H])CCCC(C)C
A1037	*C(=O)C(=C(C)C)CCC(=CCCC(=CCCC=C(C)CCC=C(C)CCC(C(=O)O[H])=C(C)C)C)C
A1038	*C(=O)CC(=CCCC=C(CC(=O)O[H])CCC=C(C)CCC=C(C)C)CCC=C(C)CCC=C(C)C
A1039	*C(=O)CC(=CCCC(=CCCC=C(C)CCC=C(CC(=O)O[H])CCC=C(C)C)C)CCC=C(C)C
A1040	*C(=O)CC(=CCCC(=CCCC(=CCCC=C(C)CCC=C(C)CCC=C(C)CC(=O)O[H])C)C)C
A1041	*C(=O)C(=C(C)CCC=C(C)C)CCC(=CCCC=C(C)CCC(C(=O)O[H])=C(C)CCC=C(C)C)C
A1042	*C(=O)CN(C)CCCCCCN(C)CC(=O)O[H]
A1043	*C(=O)C(N(C)C)CCCCC(C(=O)O[H])N(C)C
A1044	*C(=O)C(CN(C)C)CCC(C(=O)O[H])CN(C)C
A1045	*C(=O)C(=CC=C(C(=O)O[H])C)C
A1046	*C(=O)CC=CC=CCC(=O)O[H]
A1047	*C(=O)CCCSCCCC(=O)O[H]
A1048	*C(=O)C(C)CSCC(C(=O)O[H])C
A1049	*C(=O)C(SC(C(=O)O[H])CC)CC
A1050	*C(=O)C1NC(C(=O)O[H])CCCC1
A1051	*C(=O)C1CNCC(C(=O)O[H])CC1
A1052	*C(=O)C1CCNCCC1C(=O)O[H]
A1053	*C(=O)CN(C)CCCCN(C)CC(=O)O[H]
A1054	*C(=O)C(N(C)C)CCC(C(=O)O[H])N(C)C
A1055	*C(=O)CN(C)CC#CCN(C)CC(=O)O[H]
A1056	*C(=O)C(C#N)CCC(C#N)C(=O)O[H]
A1057	*C(=O)N(CC)CCN(C(=O)O[H])CC
A1058	*C(=O)C(NCCNC(C(=O)O[H])C)C
A1059	*C(=O)CCNCCNCCC(=O)O[H]
A1060	*C(=O)C1=CCCC(C(=O)O[H])=CCC1
A1061	*C(=O)C1=CCCC=C(C(=O)O[H])CC1
A1062	*C(=O)C1C=CCC(C(=O)O[H])C=CC1
A1063	*C(=O)C1C=CC(C(=O)O[H])CC=CC1
A1064	*C(=O)C(OCOC(C(=O)O[H])C)C
A1065	*C(=O)CCOCOCCC(=O)O[H]
A1066	*C(=O)C(CNCC(C(=O)O[H])CC)CC
A1067	*C(=O)C(C)CCNCCC(C(=O)O[H])C
A1068	*C(=O)CCCCNCCCCC(=O)O[H]
A1069	*C(=O)CC(c1cc(C(=O)CCCC#C)cc(C(C)(C)CC(=O)O[H])c1)(C)C
A1070	*C(=O)CCCCC#CC#CCCCCC(=O)O[H]
A1071	*C(=O)C(C)CCC#CC#CCCC(C(=O)O[H])C
A1072	*C(=O)C(CC#CC#CCC(C(=O)O[H])CC)CC
A1073	*C(=O)C(CCNCCC(C(=O)O[H])CCCCC)CCCCC
A1074	*C(=O)C(CCCNCCCC(C(=O)O[H])CCCC)CCCC
A1075	*C(=O)C(CCC)CCCCNCCCCC(C(=O)O[H])CCC
A1076	*C(=O)C(CC)CCCCCNCCCCCC(C(=O)O[H])CC
A1077	*C(=O)C(C)CCCCCCNCCCCCCC(C(=O)O[H])C
A1078	*C(=O)CCCCCCCCNCCCCCCCCC(=O)O[H]
A1079	*C(=O)C(C)CCCCCCCCNCCCCCCCCC(C(=O)O[H])C
A1080	*C(=O)CCCCCCCCCCNCCCCCCCCCCC(=O)O[H]
A1081	*C(=O)C(CCCNCCCC(C(=O)O[H])CCCCCC)CCCCCC
A1082	*C(=O)C(CCCCNCCCCC(C(=O)O[H])CCCCC)CCCCC
A1083	*C(=O)C(CCCC)CCCCCNCCCCCC(C(=O)O[H])CCCC
A1084	*C(=O)C(CCC)CCCCCCNCCCCCCC(C(=O)O[H])CCC
A1085	*C(=O)C(CC)CCCCCCCNCCCCCCCC(C(=O)O[H])CC
A1086	*C(=O)C1C(=C)C(C(=O)O[H])C1
A1087	*C(=O)c1oc(C(=O)O[H])cc(=S)c1
A1088	*C(=O)c1cocc(C(=O)O[H])c1=S
A1089	*C(=O)c1sc(C(=O)O[H])cc(=S)c1
A1090	*C(=O)c1cscc(C(=O)O[H])c1=S
A1091	*C(=O)c1cc(C(=O)O[H])cc(S(OC)(OC)CC)c1
A1092	*C(=O)c1cccc(C(=O)O[H])c1S(OC)(OC)CC
A1093	*C(=O)COS(OCC(=O)O[H])(c1ccccc1)CC
A1094	*C(=O)C1CC1C(=O)C1CC1C(=O)O[H]
A1095	*C(=O)C1(C(=O)C2(C(=O)O[H])CC2)CC1
A1096	*C(=O)c1nc(C(=O)O[H])cc(NC)c1
A1097	*C(=O)c1cncc(C(=O)O[H])c1NC
A1098	*C(=O)C1C(=O)NC(=O)C(C(=O)O[H])C1
A1099	*C(=O)CCCCCCCCCCCCCCCCCC(=O)O[H]
A1100	*C(=O)C(C)CCCCCCCCCCCCCC(C(=O)O[H])C
A1101	*C(=O)C(CC)CCCCCCCCCCCC(C(=O)O[H])CC
A1102	*C(=O)C(CCC)CCCCCCCCCC(C(=O)O[H])CCC
A1103	*C(=O)C(CCCC)CCCCCCCC(C(=O)O[H])CCCC
A1104	*C(=O)C(CCCCC)CCCCCC(C(=O)O[H])CCCCC
A1105	*C(=O)CC1(CC(=O)O[H])OCCC1C
A1106	*C(=O)c1nc(C(=O)O[H])cc(C(=O)C)c1
A1107	*C(=O)c1cncc(C(=O)O[H])c1C(=O)C
A1108	*C(=O)c1nc(C(=O)O[H])cc(N(C)C)c1
A1109	*C(=O)c1cncc(C(=O)O[H])c1N(C)C
A1110	*C(=O)CN(c1ccncc1)CC(=O)O[H]
A1111	*C(=O)c1nc(C(=O)O[H])cc(CCC)c1
A1112	*C(=O)c1cncc(C(=O)O[H])c1CCC
A1113	*C(=O)c1cc(N=S=O)cc(C(=O)O[H])c1
A1114	*C(=O)c1cccc(C(=O)O[H])c1N=S=O
A1115	*C(=O)CCCCCCCCCCC(C)CCCCCCCCCCC(=O)O[H]
A1116	*C(=O)C(C)CCCCCCCCC(C)CCCCCCCCC(C(=O)O[H])C
A1117	*C(=O)C(CC)CCCCCCCC(C)CCCCCCCC(C(=O)O[H])CC
A1118	*C(=O)C(CCC)CCCCCCC(C)CCCCCCC(C(=O)O[H])CCC
A1119	*C(=O)C(CCCC)CCCCCC(C)CCCCCC(C(=O)O[H])CCCC
A1120	*C(=O)C(CCCCC)CCCCC(C)CCCCC(C(=O)O[H])CCCCC
A1121	*C(=O)C(CCCCCC)CCCC(C)CCCC(C(=O)O[H])CCCCCC
A1122	*C(=O)CCCCCC(C)CCCCCCCCC(C)CCCCCC(=O)O[H]
A1123	*C(=O)C(C)CCCC(C)CCCCCCCCC(C)CCCC(C(=O)O[H])C
A1124	*C(=O)C(CC)CCC(C)CCCCCCCCC(C)CCC(C(=O)O[H])CC
A1125	*C(=O)C(CCC)CC(C)CCCCCCCCC(C)CC(C(=O)O[H])CCC
A1126	*C(=O)C(CCCC)C(C)CCCCCCCCC(C)C(C(=O)O[H])CCCC
A1127	*C(=O)C(C)(CCCCC)CCCCCCCCC(C(=O)O[H])(C)CCCCC
A1128	*C(=O)CC(CCCCC)CCCCCCCCC(CC(=O)O[H])CCCCC
A1129	*C(=O)C(CCCCCCC(C(=O)O[H])C(C)CCCCC)C(C)CCCCC
A1130	*C(=O)C1CCCC(C(=O)O[H])C1CC=C
A1131	*C(=O)C1CC(C(=O)O[H])CC(CC=C)C1
A1132	*C(=O)C1CCCC2C(C(=O)O[H])CC=CC12
A1133	*C(=O)C1CCCC(C(=O)O[H])C1C(=O)CC
A1134	*C(=O)C1CC(C(=O)O[H])CC(C(=O)CC)C1
A1135	*C(=O)Cc1nc(C)c(C)nc1CC(=O)O[H]
A1136	*C(=O)Cc1nc(CC(=O)O[H])c(C)nc1C
A1137	*C(=O)Cc1nc(C)c(CC(=O)O[H])nc1C
A1138	*C(=O)C1C(=C)C(C(=O)O[H])CC(C(C)C)C1
A1139	*C(=O)C1CC(=C)CC(C(=O)O[H])C1C(C)C
A1140	*C(=O)CC(CC(=O)O[H])C1CCC(=C)CC1
A1141	*C(=O)C1CC(C)CC(C(=O)O[H])C1C(=C)C
A1142	*C(=O)C1CC(C(=C)C)CC(C(=O)O[H])C1C
A1143	*C(=O)CC(C)(CC(=O)O[H])C1CCCC1
A1144	*C(=O)C1CCC(C(=O)O[H])C1C(C)(C)C
A1145	*C(=O)CS(C=C)(c1ccccc1)CC(=O)O[H]
A1146	*C(=O)c1cccc(C(=O)O[H])c1S(C=C)(C)C
A1147	*C(=O)c1cc(C(=O)O[H])cc(S(C=C)(C)C)c1
A1148	*C(=O)c1cc(C(=O)O[H])cc(C(OC)OC)c1
A1149	*C(=O)c1cccc(C(=O)O[H])c1C(OC)OC
A1150	*C(=O)COC(OCC(=O)O[H])c1ccccc1
A1151	*C(=O)C1CCCCC1C(c1ccccc1)(CCCC)C1CCCCC1C(=O)O[H]
A1152	*C(=O)C1CCCC(C(c2ccccc2)(CCCC)C2CCCC(C(=O)O[H])C2)C1
A1153	*C(=O)C1CCC(C(c2ccccc2)(CCCC)C2CCC(C(=O)O[H])CC2)CC1
A1154	*C(=O)c1cccc(C(=O)O[H])c1-n1nccc1
A1155	*C(=O)c1cc(C(=O)O[H])cc(-n2nccc2)c1
A1156	*C(=O)C1NC(C(=O)O[H])CC(CC)C1
A1157	*C(=O)C1CNCC(C(=O)O[H])C1CC
A1158	*C(=O)CCCCC(CN(C(=O)C(C)C)CC(CC)CCCCC(=O)O[H])CC
A1159	*C(=O)CCC(CN(C(=O)C(C)C)CC(CCC(=O)O[H])CCCC)CCCC
A1160	*C(=O)C(C)CCC(CN(C(=O)C(C)C)CC(CC)CCC(C(=O)O[H])C)CC
A1161	*C(=O)C(CN(C(=O)C(C)C)CC(C(=O)O[H])(CC)CCCC)(CC)CCCC
A1162	*C(=O)c1cc(C(c2ccc(C#N)c(C(=O)O[H])c2)n2ncnc2)ccc1C#N
A1163	*C(=O)c1cc(C#N)ccc1C(c1ccc(C#N)cc1C(=O)O[H])n1ncnc1
A1164	*C(=O)C1=C(C2=C(C(=O)O[H])CCCC2)CCCC1
A1165	*C(=O)C1C=C(C2=CC(C(=O)O[H])CCC2)CCC1
A1166	*C(=O)C1CC=C(C2=CCC(C(=O)O[H])CC2)CC1
A1167	*C(=O)C1CC(C2=CCCC(C(=O)O[H])C2)=CCC1
A1168	*C(=O)C1C(C2=CCCCC2C(=O)O[H])=CCCC1
A1169	*C(=O)CCCCCSSCCCCCC(=O)O[H]
A1170	*C(=O)C(C)CCCSSCCCC(C(=O)O[H])C
A1171	*C(=O)C(CC)CCSSCCC(C(=O)O[H])CC
A1172	*C(=O)C(CSSCC(C(=O)O[H])CCC)CCC
A1173	*C(=O)N(CC)CCNCCN(C(=O)O[H])CC
A1174	*C(=O)C(NCCNCCNC(C(=O)O[H])C)C
A1175	*C(=O)CCNCCNCCNCCC(=O)O[H]
A1176	*C(=O)C(NCC)CNCC(C(=O)O[H])NCC
A1177	*C(=O)CCCCCCCCCCCCCCCCCCC(=O)O[H]
A1178	*C(=O)C(C)CCCCCCCCCCCCCCC(C(=O)O[H])C
A1179	*C(=O)C(CC)CCCCCCCCCCCCC(C(=O)O[H])CC
A1180	*C(=O)C(CCC)CCCCCCCCCCC(C(=O)O[H])CCC
A1181	*C(=O)C(CCCC)CCCCCCCCC(C(=O)O[H])CCCC
A1182	*C(=O)C(CCCCC)CCCCCCC(C(=O)O[H])CCCCC
A1183	*C(=O)CCCCCCCCC=CCCCCCCCCC(=O)O[H]
A1184	*C(=O)C(CCC=CCCC(C(=O)O[H])CCCCC)CCCCC
A1185	*C(=O)C(CCCC=CCCCC(C(=O)O[H])CCCC)CCCC
A1186	*C(=O)C(CCC)CCCCC=CCCCCC(C(=O)O[H])CCC
A1187	*C(=O)C(CC)CCCCCC=CCCCCCC(C(=O)O[H])CC
A1188	*C(=O)C(C)CCCCCCC=CCCCCCCC(C(=O)O[H])C
A1189	*C(=O)CCCCCCCCCCCCCCCC(=O)O[H]
A1190	*C(=O)C(C)CCCCCCCCCCCC(C(=O)O[H])C
A1191	*C(=O)C(CC)CCCCCCCCCC(C(=O)O[H])CC
A1192	*C(=O)C(CCC)CCCCCCCC(C(=O)O[H])CCC
A1193	*C(=O)C(CCCC)CCCCCC(C(=O)O[H])CCCC
A1194	*C(=O)CCCCCCCCCCCCCCC(=O)O[H]
A1195	*C(=O)C(C)CCCCCCCCCCC(C(=O)O[H])C
A1196	*C(=O)C(CC)CCCCCCCCC(C(=O)O[H])CC
A1197	*C(=O)C(CCC)CCCCCCC(C(=O)O[H])CCC
A1198	*C(=O)C(CCCC)CCCCC(C(=O)O[H])CCCC
A1199	*C(=O)CCCCCCCCCCCCCCCCCCCCCC(=O)O[H]
A1200	*C(=O)C(C)CCCCCCCCCCCCCCCCCC(C(=O)O[H])C
A1201	*C(=O)C(CC)CCCCCCCCCCCCCCCC(C(=O)O[H])CC
A1202	*C(=O)C(CCC)CCCCCCCCCCCCCC(C(=O)O[H])CCC
A1203	*C(=O)C(CCCC)CCCCCCCCCCCC(C(=O)O[H])CCCC
A1204	*C(=O)C(CCCCC)CCCCCCCCCC(C(=O)O[H])CCCCC
A1205	*C(=O)C(CCCCCC)CCCCCCCC(C(=O)O[H])CCCCCC
A1206	*C(=O)CC(=C1C(=C(C)C)C(C)(C)C1(C)C)CC(=O)O[H]
A1207	*C(=O)CC(=C1C(=C(C)CC(=O)O[H])C(C)(C)C1(C)C)C
A1208	*C(=O)CC1(CC(=O)O[H])C(=C(C)C)C(=C(C)C)C1(C)C
A1209	*C(=O)c1nc(-c2nc(C(=O)O[H])cc(C)c2)cc(C)c1
A1210	*C(=O)c1c(-c2nccc(C)c2C(=O)O[H])nccc1C
A1211	*C(=O)c1cnc(-c2ncc(C(=O)O[H])c(C)c2)cc1C
A1212	*C(=O)Cc1ccnc(-c2nccc(CC(=O)O[H])c2)c1
A1213	*C(=O)c1ccc(C2CC2c2ccc(C(=O)O[H])cc2)cc1
A1214	*C(=O)c1cccc(C2CC2c2cccc(C(=O)O[H])c2)c1
A1215	*C(=O)c1ccccc1C1CC1c1ccccc1C(=O)O[H]
A1216	*C(=O)c1ccc2c(c1)-c1cc(C(=O)O[H])ccc1CC(=O)C2
A1217	*C(=O)c1ccc2c(c1)CC(=O)Cc1cc(C(=O)O[H])ccc1-2
A1218	*C(=O)c1cccc2c1CC(=O)Cc1c(C(=O)O[H])cccc1-2
A1219	*C(=O)c1cccc2c1-c1c(C(=O)O[H])cccc1CC(=O)C2
A1220	*C(=O)c1cccc2c1C(=CCCN(C)C)c1c(cccc1C(=O)O[H])S2
A1221	*C(=O)c1ccc2c(c1)C(=CCCN(C)C)c1cc(C(=O)O[H])ccc1S2
A1222	*C(=O)c1ccc2c(c1)Sc1cc(C(=O)O[H])ccc1C2=CCCN(C)C
A1223	*C(=O)c1cccc2c1Sc1c(C(=O)O[H])cccc1C2=CCCN(C)C
A1224	*C(=O)c1ccc(SSc2ccc(C(=O)O[H])cc2)cc1
A1225	*C(=O)c1cccc(SSc2cccc(C(=O)O[H])c2)c1
A1226	*C(=O)c1ccccc1SSc1ccccc1C(=O)O[H]
A1227	*C(=O)c1ccc2c(c1)C(=O)c1cc(C(=O)O[H])ccc1C2
A1228	*C(=O)c1ccc2c(c1)Cc1cc(C(=O)O[H])ccc1C2=O
A1229	*C(=O)c1cccc2c1Cc1c(C(=O)O[H])cccc1C2=O
A1230	*C(=O)c1cccc2c1C(=O)c1c(C(=O)O[H])cccc1C2
A1231	*C(=O)C1(C#CC#CC2(C(=O)O[H])CC2)CC1
A1232	*C(=O)c1ccc(C(=O)O[H])c2c1C(=O)C(c1ccccc1)C2=O
A1233	*C(=O)C1CCC(C(c2ccccc2)(CC(CC)CCCC)C2CCC(C(=O)O[H])CC2)CC1
A1234	*C(=O)C1CCC(C(c2ccccc2)(C(C)CCCCCC)C2CCC(C(=O)O[H])CC2)CC1
A1235	*C(=O)c1nc(-c2nc(-c3nc(C(=O)O[H])ccc3)ccc2)ccc1
A1236	*C(=O)c1cnc(-c2nc(-c3ncc(C(=O)O[H])cc3)ccc2)cc1
A1237	*C(=O)c1ccnc(-c2nc(-c3nccc(C(=O)O[H])c3)ccc2)c1
A1238	*C(=O)c1c(-c2nc(-c3ncccc3C(=O)O[H])ccc2)nccc1
A1239	*C(=O)c1ccccc1N=CC=Nc1ccccc1C(=O)O[H]
A1240	*C(=O)c1cccc(N=CC=Nc2cccc(C(=O)O[H])c2)c1
A1241	*C(=O)c1ccc(N=CC=Nc2ccc(C(=O)O[H])cc2)cc1
A1242	*C(=O)C(c1c(C)nc(C)c(C(C(=O)O[H])C)c1)C
A1243	*C(=O)CCc1c(C)nc(C)c(CCC(=O)O[H])c1
A1244	*C(=O)Cc1nc(CC(=O)O[H])c(CC)cc1CC
A1245	*C(=O)CC(Oc1ccccc1NC)CC(=O)O[H]
A1246	*C(=O)C(CCC)C(COc1ccccc1OCC(CC)C(C(=O)O[H])CCC)CC
A1247	*C(=O)C(CC)CC(COc1ccccc1OCC(CC)CC(C(=O)O[H])CC)CC
A1248	*C(=O)C(C)CCC(COc1ccccc1OCC(CC)CCC(C(=O)O[H])C)CC
A1249	*C(=O)CCCCC(COc1ccccc1OCC(CC)CCCCC(=O)O[H])CC
A1250	*C(=O)C(Oc1ccccc1OC(C(=O)O[H])C(CC)CCCC)C(CC)CCCC
A1251	*C(=O)C(COc1ccccc1OCC(C(=O)O[H])(CC)CCCC)(CC)CCCC
A1252	*C(=O)C(C)C(COc1ccccc1OCC(CCCC)C(C(=O)O[H])C)CCCC
A1253	*C(=O)CCC(COc1ccccc1OCC(CCC(=O)O[H])CCCC)CCCC
A1254	*C(=O)C1CCCCC1C(c1ccccc1)(CCCCCC)C1CCCCC1C(=O)O[H]
A1255	*C(=O)C1CCCC(C(c2ccccc2)(CCCCCC)C2CCCC(C(=O)O[H])C2)C1
A1256	*C(=O)C1CCC(C(c2ccccc2)(CCCCCC)C2CCC(C(=O)O[H])CC2)CC1
A1257	*C(=O)c1ccc(C(c2ccccc2)(c2ccc(C(=O)O[H])cc2)c2cccc(C)c2)cc1
A1258	*C(=O)c1cccc(C(c2ccccc2)(c2cccc(C(=O)O[H])c2)c2cccc(C)c2)c1
A1259	*C(=O)c1ccccc1C(c1ccccc1)(c1cccc(C)c1)c1ccccc1C(=O)O[H]
A1260	*C(=O)c1cc(C(c2ccc(OC#N)c(C(=O)O[H])c2)(C)C)ccc1OC#N
A1261	*C(=O)CC(C)(CC(=O)O[H])CC(C(=C)C)C
A1262	*C(=O)c1ccc(CCCC(c2ccccc2)CCCc2ccc(C(=O)O[H])cc2)cc1
A1263	*C(=O)c1ccccc1CCCC(c1ccccc1)CCCc1ccccc1C(=O)O[H]
A1264	*C(=O)c1cccc(CCCC(c2ccccc2)CCCc2cccc(C(=O)O[H])c2)c1
A1265	*C(=O)C(c1ccccc1)CCC(c1ccccc1)CCC(C(=O)O[H])c1ccccc1
A1266	*C(=O)c1cc(C)ccc1N(c1ccc(C)cc1)c1ccc(C)cc1C(=O)O[H]
A1267	*C(=O)c1cc(N(c2ccc(C)cc2)c2ccc(C)c(C(=O)O[H])c2)ccc1C
A1268	*C(=O)Cc1ccc(N(c2ccc(C)cc2)c2ccc(CC(=O)O[H])cc2)cc1
A1269	*C(=O)c1ccc(C(=O)c2ccccc2C(=O)c2ccc(C(=O)O[H])cc2)cc1
A1270	*C(=O)c1ccccc1C(=O)c1ccccc1C(=O)c1ccccc1C(=O)O[H]
A1271	*C(=O)c1cccc(C(=O)c2ccccc2C(=O)c2cccc(C(=O)O[H])c2)c1
A1272	*C(=O)CC(C=C)CC(=O)O[H]
A1273	*C(=O)CC(C#C)CC(=O)O[H]
A1274	*C(=O)CC(C(=O)C)CC(=O)O[H]
A1275	*C(=O)CCS(=O)(=O)C(C)(C)S(=O)(=O)CCC(=O)O[H]
A1276	*C(=O)C(C)S(=O)(=O)C(C)(C)S(=O)(=O)C(C(=O)O[H])C
A1277	*C(=O)CC(CC(=O)O[H])(S(=O)(=O)CC)S(=O)(=O)CC
A1278	*C(=O)c1cc(C)ccc1C1(c2ccc(C)cc2C(=O)O[H])C(=O)Nc2ccccc21
A1279	*C(=O)c1cc(C2(c3ccc(C)c(C(=O)O[H])c3)C(=O)Nc3ccccc32)ccc1C
A1280	*C(=O)Cc1ccc(C2(c3ccc(CC(=O)O[H])cc3)C(=O)Nc3ccccc32)cc1
A1281	*C(=O)c1cc(C)cc(C2(c3cc(C(=O)O[H])cc(C)c3)OS(=O)(=O)c3ccccc32)c1
A1282	*C(=O)c1ccc(C2(c3ccc(C(=O)O[H])c(C)c3)OS(=O)(=O)c3ccccc32)cc1C
A1283	*C(=O)Cc1cccc(C2(c3cccc(CC(=O)O[H])c3)OS(=O)(=O)c3ccccc32)c1
A1284	*C(=O)c1c(C)cccc1C1(c2cccc(C)c2C(=O)O[H])OS(=O)(=O)c2ccccc21
A1285	*C(=O)c1ccc(C)cc1C1(c2cc(C)ccc2C(=O)O[H])OS(=O)(=O)c2ccccc21
A1286	*C(=O)CCC(C)(C)CCC(=O)O[H]
A1287	*C(=O)C(C)C(C)(C)C(C(=O)O[H])C
A1288	*C(=O)CC(CC(=O)O[H])(CC)CC
A1289	*C(=O)CCOC(OCCC(=O)O[H])(CC)CC
A1290	*C(=O)C(OC(OC(C(=O)O[H])C)(CC)CC)C
A1291	*C(=O)C(C)C(OCC)(OCC)C(C(=O)O[H])C
A1292	*C(=O)CCC(OCC)(OCC)CCC(=O)O[H]
A1293	*C(=O)CC(CC(=O)O[H])(CC)CCCC
A1294	*C(=O)c1ccc(OP(=O)(Oc2ccccc2)Oc2ccc(C(=O)O[H])cc2)cc1
A1295	*C(=O)c1ccccc1OP(=O)(Oc1ccccc1)Oc1ccccc1C(=O)O[H]
A1296	*C(=O)c1cccc(OP(=O)(Oc2ccccc2)Oc2cccc(C(=O)O[H])c2)c1
A1297	*C(=O)COP(=S)(Oc1ccc(S(=O)=O)cc1)OCC(=O)O[H]
A1298	*C(=O)CCCCCC(CC)CCCCCCCCC(CC)CCCCCC(=O)O[H]
A1299	*C(=O)C(C)CCCC(CC)CCCCCCCCC(CC)CCCC(C(=O)O[H])C
A1300	*C(=O)C(CC)CCC(CC)CCCCCCCCC(CC)CCC(C(=O)O[H])CC
A1301	*C(=O)C(CCC)CC(CC)CCCCCCCCC(CC)CC(C(=O)O[H])CCC
A1302	*C(=O)C(CCCC)C(CC)CCCCCCCCC(CC)C(C(=O)O[H])CCCC
A1303	*C(=O)C(CC)(CCCCC)CCCCCCCCC(C(=O)O[H])(CC)CCCCC
A1304	*C(=O)C(C)C(CCCCC)CCCCCCCCC(CCCCC)C(C(=O)O[H])C
A1305	*C(=O)CCC(CCCCC)CCCCCCCCC(CCC(=O)O[H])CCCCC
A1306	*C(=O)C(CCCCCCC(C(=O)O[H])C(CC)CCCCC)C(CC)CCCCC
A1307	*C(=O)C(COCOCC(C(=O)O[H])CCCCC)CCCCC
A1308	*C(=O)C(CCOCOCCC(C(=O)O[H])CCCC)CCCC
A1309	*C(=O)C(CCC)CCCOCOCCCC(C(=O)O[H])CCC
A1310	*C(=O)C(CC)CCCCOCOCCCCC(C(=O)O[H])CC
A1311	*C(=O)C(C)CCCCCOCOCCCCCC(C(=O)O[H])C
A1312	*C(=O)CCCCCCCOCOCCCCCCCC(=O)O[H]
A1313	*C(=O)C1CCC(C(=O)O[H])C1CC#C
A1314	*C(=O)CC(C=CC(=CC)C)CC(=O)O[H]
A1315	*C(=O)c1ccc(-c2cccc(-c3ccc(C(=O)O[H])cc3)c2-c2ccccc2)cc1
A1316	*C(=O)c1ccccc1-c1cccc(-c2ccccc2C(=O)O[H])c1-c1ccccc1
A1317	*C(=O)c1cccc(-c2cccc(-c3cccc(C(=O)O[H])c3)c2-c2ccccc2)c1
A1318	*C(=O)c1ccc(-c2cccc(-c3cccc(-c4ccc(C(=O)O[H])cc4)c3)c2)cc1
A1319	*C(=O)c1ccccc1-c1cccc(-c2cccc(-c3ccccc3C(=O)O[H])c2)c1
A1320	*C(=O)c1cccc(-c2cccc(-c3cccc(-c4cccc(C(=O)O[H])c4)c3)c2)c1
A1321	*C(=O)c1ccc(-c2ccc(C(=O)O[H])c(-c3ccccc3)c2)cc1-c1ccccc1
A1322	*C(=O)c1cc(-c2ccccc2)cc(-c2cc(C(=O)O[H])cc(-c3ccccc3)c2)c1
A1323	*C(=O)COP(=S)(OCC(=O)O[H])SCC(=O)NCC
A1324	*C(=O)N(C(=O)N(C(=O)O[H])CC)CC
A1325	*C(=O)C(NC(=O)NC(C(=O)O[H])C)C
A1326	*C(=O)CCNC(=O)NCCC(=O)O[H]
A1327	*C(=O)C(C=C1C(=O)C(=CC(C(=O)O[H])=Cc2ccccc2OC)CC1)=Cc1ccccc1OC
A1328	*C(=O)c1cccc(OC)c1C=CC=C1C(=O)C(=CC=Cc2c(OC)cccc2C(=O)O[H])CC1
A1329	*C(=O)c1ccc(OC)c(C=CC=C2C(=O)C(=CC=Cc3cc(C(=O)O[H])ccc3OC)CC2)c1
A1330	*C(=O)c1ccc(C=CC=C2C(=O)C(=CC=Cc3ccc(C(=O)O[H])cc3OC)CC2)c(OC)c1
A1331	*C(=O)c1cccc(C=CC=C2C(=O)C(=CC=Cc3cccc(C(=O)O[H])c3OC)CC2)c1OC
A1332	*C(=O)COc1ccccc1C=CC=C1C(=O)C(=CC=Cc2ccccc2OCC(=O)O[H])CC1
A1333	*C(=O)C(=CC=C1C(=O)C(=CC=C(C(=O)O[H])c2ccccc2OC)CC1)c1ccccc1OC
A1334	*C(=O)C(C=C1C(=O)C(=CC(C(=O)O[H])=Cc2ccccc2OC)CCC1)=Cc1ccccc1OC
A1335	*C(=O)c1cccc(OC)c1C=CC=C1C(=O)C(=CC=Cc2c(OC)cccc2C(=O)O[H])CCC1
A1336	*C(=O)c1ccc(OC)c(C=CC=C2C(=O)C(=CC=Cc3cc(C(=O)O[H])ccc3OC)CCC2)c1
A1337	*C(=O)c1ccc(C=CC=C2C(=O)C(=CC=Cc3ccc(C(=O)O[H])cc3OC)CCC2)c(OC)c1
A1338	*C(=O)c1cccc(C=CC=C2C(=O)C(=CC=Cc3cccc(C(=O)O[H])c3OC)CCC2)c1OC
A1339	*C(=O)COc1ccccc1C=CC=C1C(=O)C(=CC=Cc2ccccc2OCC(=O)O[H])CCC1
A1340	*C(=O)C(=CC=C1C(=O)C(=CC=C(C(=O)O[H])c2ccccc2OC)CCC1)c1ccccc1OC
A1341	*C(=O)C(C=C1C(=O)C(=CC(C(=O)O[H])=Cc2ccccc2OC)CC(C)C1)=Cc1ccccc1OC
A1342	*C(=O)c1cccc(OC)c1C=CC=C1C(=O)C(=CC=Cc2c(OC)cccc2C(=O)O[H])CC(C)C1
A1343	*C(=O)c1ccc(OC)c(C=CC=C2C(=O)C(=CC=Cc3cc(C(=O)O[H])ccc3OC)CC(C)C2)c1
A1344	*C(=O)c1ccc(C=CC=C2C(=O)C(=CC=Cc3ccc(C(=O)O[H])cc3OC)CC(C)C2)c(OC)c1
A1345	*C(=O)c1cccc(C=CC=C2C(=O)C(=CC=Cc3cccc(C(=O)O[H])c3OC)CC(C)C2)c1OC
A1346	*C(=O)COc1ccccc1C=CC=C1C(=O)C(=CC=Cc2ccccc2OCC(=O)O[H])CC(C)C1
A1347	*C(=O)C(=CC=C1C(=O)C(=CC=C(C(=O)O[H])c2ccccc2OC)CC(C)C1)c1ccccc1OC
A1348	*C(=O)C(C=C1C(=O)C(=CC(C(=O)O[H])=Cc2ccccc2OC)CCCC1)=Cc1ccccc1OC
A1349	*C(=O)c1cccc(OC)c1C=CC=C1C(=O)C(=CC=Cc2c(OC)cccc2C(=O)O[H])CCCC1
A1350	*C(=O)c1ccc(OC)c(C=CC=C2C(=O)C(=CC=Cc3cc(C(=O)O[H])ccc3OC)CCCC2)c1
A1351	*C(=O)c1ccc(C=CC=C2C(=O)C(=CC=Cc3ccc(C(=O)O[H])cc3OC)CCCC2)c(OC)c1
A1352	*C(=O)c1cccc(C=CC=C2C(=O)C(=CC=Cc3cccc(C(=O)O[H])c3OC)CCCC2)c1OC
A1353	*C(=O)COc1ccccc1C=CC=C1C(=O)C(=CC=Cc2ccccc2OCC(=O)O[H])CCCC1
A1354	*C(=O)C(=CC=C1C(=O)C(=CC=C(C(=O)O[H])c2ccccc2OC)CCCC1)c1ccccc1OC
A1355	*C(=O)C(C=C1C(=O)C(=CC(C(=O)O[H])=Cc2ccccc2OC)CCCCC1)=Cc1ccccc1OC
A1356	*C(=O)c1cccc(OC)c1C=CC=C1C(=O)C(=CC=Cc2c(OC)cccc2C(=O)O[H])CCCCC1
A1357	*C(=O)c1ccc(OC)c(C=CC=C2C(=O)C(=CC=Cc3cc(C(=O)O[H])ccc3OC)CCCCC2)c1
A1358	*C(=O)c1ccc(C=CC=C2C(=O)C(=CC=Cc3ccc(C(=O)O[H])cc3OC)CCCCC2)c(OC)c1
A1359	*C(=O)c1cccc(C=CC=C2C(=O)C(=CC=Cc3cccc(C(=O)O[H])c3OC)CCCCC2)c1OC
A1360	*C(=O)COc1ccccc1C=CC=C1C(=O)C(=CC=Cc2ccccc2OCC(=O)O[H])CCCCC1
A1361	*C(=O)C(=CC=C1C(=O)C(=CC=C(C(=O)O[H])c2ccccc2OC)CCCCC1)c1ccccc1OC
A1362	*C(=O)c1ccc(OS(Oc2ccccc2)(Oc2ccccc2)Oc2ccc(C(=O)O[H])cc2)cc1
A1363	*C(=O)c1cccc(OS(Oc2ccccc2)(Oc2ccccc2)Oc2cccc(C(=O)O[H])c2)c1
A1364	*C(=O)c1ccccc1OS(Oc1ccccc1)(Oc1ccccc1)Oc1ccccc1C(=O)O[H]
A1365	*C(=O)C#Cc1ccc(Sc2ccc(C#CC(=O)O[H])cc2)cc1
A1366	*C(=O)c1cc(Sc2ccc(C#C)c(C(=O)O[H])c2)ccc1C#C
A1367	*C(=O)c1cc(C#C)ccc1Sc1ccc(C#C)cc1C(=O)O[H]
A1368	*C(=O)c1c(C#C)cc2c(C#C)c(C(=O)O[H])ccc2c1
A1369	*C(=O)C#Cc1ccc(Oc2ccc(C#CC(=O)O[H])cc2)cc1
A1370	*C(=O)c1cc(Oc2ccc(C#C)c(C(=O)O[H])c2)ccc1C#C
A1371	*C(=O)c1cc(C#C)ccc1Oc1ccc(C#C)cc1C(=O)O[H]
A1372	*C(=O)C#Cc1ccc2ccc(C#CC(=O)O[H])cc2c1
A1373	*C(=O)c1c(C#C)cc2cc(C#C)c(C(=O)O[H])cc2c1
A1374	*C(=O)C#Cc1cccc2c(C#CC(=O)O[H])cccc12
A1375	*C(=O)c1ccc2c(C#C)c(C(=O)O[H])ccc2c1C#C
A1376	*C(=O)c1cc(C#C)c2cc(C(=O)O[H])cc(C#C)c2c1
A1377	*C(=O)c1ccc(C#C)c2c(C(=O)O[H])ccc(C#C)c12
A1378	*C(=O)c1cc(N(c2ccc(C)c(C(=O)O[H])c2)c2cccc(C)c2)ccc1C
A1379	*C(=O)c1cc(C)ccc1N(c1cccc(C)c1)c1ccc(C)cc1C(=O)O[H]
A1380	*C(=O)Cc1ccc(N(c2ccc(CC(=O)O[H])cc2)c2cccc(C)c2)cc1
A1381	*C(=O)c1ccc(C(=O)O[H])c2c(=O)c12
A1382	*C(=O)c1ccc2c(c1)C(=O)c1cc(C(=O)O[H])ccc1C2=O
A1383	*C(=O)c1ccc2c(c1)C(=O)c1ccc(C(=O)O[H])cc1C2=O
A1384	*C(=O)c1ccc(C(=O)O[H])c2c1C(=O)c1ccccc1C2=O
A1385	*C(=O)c1cccc2c1C(=O)c1cccc(C(=O)O[H])c1C2=O
A1386	*C(=O)c1cccc2c1C(=O)c1c(C(=O)O[H])cccc1C2=O
A1387	*C(=O)c1ccc(C(=O)O[H])c2c1C(=O)C=CC2=O
A1388	*C(=O)C(CC)CC(Cc1ccccc1CC(CC)CC(C(=O)O[H])CC)CC
A1389	*C(=O)C(C)CCC(Cc1ccccc1CC(CC)CCC(C(=O)O[H])C)CC
A1390	*C(=O)CCCCC(Cc1ccccc1CC(CC)CCCCC(=O)O[H])CC
A1391	*C(=O)C(Cc1ccccc1CC(C(=O)O[H])(CC)CCCC)(CC)CCCC
A1392	*C(=O)C(C)C(Cc1ccccc1CC(CCCC)C(C(=O)O[H])C)CCCC
A1393	*C(=O)CCC(Cc1ccccc1CC(CCC(=O)O[H])CCCC)CCCC
A1394	*C(=O)C(CCC)C(Cc1ccccc1CC(CC)C(C(=O)O[H])CCC)CC
A1395	*C(=O)C(c1ccccc1C(C(=O)O[H])CC)CC
A1396	*C(=O)C(CC)CCCCCc1ccccc1CCCCCC(C(=O)O[H])CC
A1397	*C(=O)C(C)CCCCCCc1ccccc1CCCCCCC(C(=O)O[H])C
A1398	*C(=O)CCCCCCCCc1ccccc1CCCCCCCCC(=O)O[H]
A1399	*C(=O)C(CCc1ccccc1CCC(C(=O)O[H])CCCCC)CCCCC
A1400	*C(=O)C(CCCc1ccccc1CCCC(C(=O)O[H])CCCC)CCCC
A1401	*C(=O)C(CCC)CCCCc1ccccc1CCCCC(C(=O)O[H])CCC
A1402	*C(=O)CCC(C)C(C)CCC(=O)O[H]
A1403	*C(=O)C(C)C(C)C(C)C(C(=O)O[H])C
A1404	*C(=O)CC(CC)C(CC(=O)O[H])CC
A1405	*C(=O)COS(OCC(=O)O[H])(C)C
A1406	*C(=O)CS(OC)(OC)CC(=O)O[H]
A1407	*C(=O)CC(CC(=O)O[H])C(C)C(C)(C)C
A1408	*C(=O)CC(C)(CC(=O)O[H])C(C)C(C)C
A1409	*C(=O)CCN(C(=O)N(CC)CCC(=O)O[H])CC
A1410	*C(=O)CCN(C(=O)N(CC)CC)CCC(=O)O[H]
A1411	*C(=O)C(N(C(=O)N(CC)CC)C(C(=O)O[H])C)C
A1412	*C(=O)C(N(C(=O)N(CC)C(C(=O)O[H])C)CC)C
A1413	*C(=O)C(=C(C(=C(C(=O)O[H])C)C)C)C
A1414	*C(=O)CC=C(C(=CCC(=O)O[H])C)C
A1415	*C(=O)CC(=CC)C(=CC)CC(=O)O[H]
A1416	*C(=O)C(C(=N)C(C(=O)O[H])C)C
A1417	*C(=O)CCC(=N)CCC(=O)O[H]
A1418	*C(=O)CN(C(OCC)OCC)CC(=O)O[H]
A1419	*C(=O)C(OC(OC(C(=O)O[H])C)N(C)C)C
A1420	*C(=O)CCOC(OCCC(=O)O[H])N(C)C
A1421	*C(=O)CC(CC(=O)O[H])(CC)CCC(C)C
A1422	*C(=O)CC(CC(=O)O[H])CCC(C)(C)CC
A1423	*C(=O)CC1(CC(=O)O[H])C(=C)N(C)c2ccccc21
A1424	*C(=O)c1ccc(C(=O)O[H])c2c1C(=O)N(C)C2=O
A1425	*C(=O)c1cc(C(=O)O[H])c(OC)c(OC)c1OC
A1426	*C(=O)COc1cccc(OCC(=O)O[H])c1OC
A1427	*C(=O)CC1(CC(=O)O[H])C(=O)NC(=O)N1
A1428	*C(=O)c1ccc(-c2ccc(C(=O)O[H])cc2)cc1
A1429	*C(=O)c1ccccc1-c1ccccc1C(=O)O[H]
A1430	*C(=O)c1cccc(-c2cccc(C(=O)O[H])c2)c1
A1431	*C(=O)C1=CC(=O)C(C(=O)O[H])=CC1=O
A1432	*C(=O)C1=CC(=O)C=C(C(=O)O[H])C1=O
A1433	*C(=O)c1c(Cc2cc(C(C)(C)C)cc(C(C)(C)C)c2C(=O)O[H])cc(C(C)(C)C)cc1C(C)(C)C
A1434	*C(=O)CC(c1cc(Cc2cc(C(C)(C)C)cc(C(C)(C)C)c2)cc(C(C)(C)CC(=O)O[H])c1)(C)C
A1435	*C(=O)CC(c1cc(Cc2cc(C(C)(C)C)cc(C(C)(C)CC(=O)O[H])c2)cc(C(C)(C)C)c1)(C)C
A1436	*C(=O)c1c(C(C)(C)C)cc(Cc2cc(C(C)(C)C)c(C(=O)O[H])c(C(C)(C)C)c2)cc1C(C)(C)C
A1437	*C(=O)CC(CC(=O)O[H])CCCC(C)(C)C
A1438	*C(=O)CC(C)(CC(=O)O[H])CCCC(C)C
A1439	*C(=O)SCCCCSC(=O)O[H]
A1440	*C(=O)SCCCCCCSC(=O)O[H]
A1441	*C(=O)C(S)CCCCC(S)C(=O)O[H]
A1442	*C(=O)C(CS)CCC(C(=O)O[H])CS
A1443	*C(=O)SCCCCCCCCSC(=O)O[H]
A1444	*C(=O)C(S)CCCCCCC(S)C(=O)O[H]
A1445	*C(=O)C(CS)CCCCC(C(=O)O[H])CS
A1446	*C(=O)C(CCS)CCC(C(=O)O[H])CCS
A1447	*C(=O)CCC1(CCC(=O)O[H])OC1
A1448	*C(=O)C(C)C1(C(C(=O)O[H])C)OC1
A1449	*C(=O)C1C(=N)C(C(=O)O[H])CC1
A1450	*C(=O)C1CC(=N)CC1C(=O)O[H]
A1451	*C(=O)CC1OC(CC(=O)O[H])C1
A1452	*C(=O)C1(C)OC(C(=O)O[H])(C)C1
A1453	*C(=O)C1C(=C)C(C(=O)O[H])CCC1
A1454	*C(=O)C1CC(=C)CC(C(=O)O[H])C1
A1455	*C(=O)c1c(C(=O)O[H])cn(C)c1
A1456	*C(=O)c1ccc(C(=O)O[H])n1C
A1457	*C(=O)C1N(C(=O)N2CC2C(=O)O[H])C1
A1458	*C(=O)CC1(CC(=O)O[H])CNCCC1
A1459	*C(=O)CC(CC(=O)O[H])C1(C)OCCC1
A1460	*C(=O)CC1(CC(=O)O[H])C(=O)CCCC1
A1461	*C(=O)C1C(=O)C(C)C(=O)C(C(=O)O[H])C1
A1462	*C(=O)c1cc(C(=O)O[H])cc(S(=O)C)c1
A1463	*C(=O)c1cccc(C(=O)O[H])c1S(=O)C
A1464	*C(=O)C1CCC=C2CCCC(C(=O)O[H])C21
A1465	*C(=O)CC(CC(=O)O[H])C1CC=C(C)CC1
A1466	*C(=O)c1cc(C(=O)O[H])cc(C(C#N)(C)C)c1
A1467	*C(=O)c1cccc(C(=O)O[H])c1C(C#N)(C)C
A1468	*C(=O)CC(C#N)(c1ccccc1)CC(=O)O[H]
A1469	*C(=O)c1oc(Cc2oc(C(=O)O[H])cc2)cc1
A1470	*C(=O)c1coc(Cc2occ(C(=O)O[H])c2)c1
A1471	*C(=O)c1c(Cc2occc2C(=O)O[H])occ1
A1472	*C(=O)c1ccc(C(=O)O[H])c2cnncc12
A1473	*C(=O)c1nnc(C(=O)O[H])c2ccccc12
A1474	*C(=O)c1c(C)cc(C(C)(C)C)cc1Cc1cc(C(C)(C)C)cc(C)c1C(=O)O[H]
A1475	*C(=O)c1c(Cc2cc(C)cc(C(C)(C)C)c2C(=O)O[H])cc(C)cc1C(C)(C)C
A1476	*C(=O)Cc1cc(Cc2cc(CC(=O)O[H])cc(C(C)(C)C)c2)cc(C(C)(C)C)c1
A1477	*C(=O)c1c(C)cc(Cc2cc(C)c(C(=O)O[H])c(C(C)(C)C)c2)cc1C(C)(C)C
A1478	*C(=O)CC(c1cc(C)cc(Cc2cc(C)cc(C(C)(C)CC(=O)O[H])c2)c1)(C)C
A1479	*C(=O)CCCCN(C(=O)N1CCCC1)CCN(C(=O)N1CCCC1)CCCCC(=O)O[H]
A1480	*C(=O)C1CN(C(=O)N(CCN(C(=O)N2CCC(C(=O)O[H])C2)CCCC)CCCC)CC1
A1481	*C(=O)C1N(C(=O)N(CCN(C(=O)N2CCCC2C(=O)O[H])CCCC)CCCC)CCC1
A1482	*C(=O)C(C)CCN(C(=O)N1CCCC1)CCN(C(=O)N1CCCC1)CCC(C(=O)O[H])C
A1483	*C(=O)C(CN(C(=O)N1CCCC1)CCN(C(=O)N1CCCC1)CC(C(=O)O[H])CC)CC
A1484	*C(=O)C(N(C(=O)N1CCCC1)CCN(C(=O)N1CCCC1)C(C(=O)O[H])CCC)CCC
A1485	*C(=O)c1cccc(C(=O)O[H])c1C(=O)C(=N)C
A1486	*C(=O)c1cc(C(=O)O[H])cc(C(=O)C(=N)C)c1
A1487	*C(=O)c1ccc(C(=O)O[H])c2c1CCCC2
A1488	*C(=O)C1c2ccccc2C(C(=O)O[H])CC1
A1489	*C(=O)c1ccc(C(=O)O[H])c2c1CC2
A1490	*C(=O)c1cc(OC)cc(-c2cc(OC)cc(C(=O)O[H])c2)c1
A1491	*C(=O)c1ccc(-c2ccc(C(=O)O[H])c(OC)c2)cc1OC
A1492	*C(=O)COc1cccc(-c2cccc(OCC(=O)O[H])c2)c1
A1493	*C(=O)c1c(OC)cccc1-c1cccc(OC)c1C(=O)O[H]
A1494	*C(=O)c1ccc(OC)cc1-c1cc(OC)ccc1C(=O)O[H]
A1495	*C(=O)c1ccc2ccc(-c3nc4cc(C(=O)O[H])ccc4cc3)nc2c1
A1496	*C(=O)c1cccc2ccc(-c3nc4c(C(=O)O[H])cccc4cc3)nc12
A1497	*C(=O)c1ccc2nc(-c3nc4ccc(C(=O)O[H])cc4cc3)ccc2c1
A1498	*C(=O)c1cccc2nc(-c3nc4cccc(C(=O)O[H])c4cc3)ccc12
A1499	*C(=O)c1cc(-c2nc3ccccc3c(C(=O)O[H])c2)nc2ccccc12
A1500	*C(=O)c1cc(-c2cc(C(=O)O[H])cc(C)c2)cc(C)c1
A1501	*C(=O)c1c(-c2cccc(C)c2C(=O)O[H])cccc1C
A1502	*C(=O)c1ccc(C)cc1-c1cc(C)ccc1C(=O)O[H]
A1503	*C(=O)c1ccc(-c2ccc(C(=O)O[H])c(C)c2)cc1C
A1504	*C(=O)Cc1cccc(-c2cccc(CC(=O)O[H])c2)c1
A1505	*C(=O)c1cc(C)cc(C(=O)O[H])c1N(C)C
A1506	*C(=O)c1cc(N(C)C)cc(C(=O)O[H])c1C
A1507	*C(=O)CN(c1ccc(C)cc1)CC(=O)O[H]
A1508	*C(=O)c1nc(Nc2nc(C(=O)O[H])ccc2)ccc1
A1509	*C(=O)c1c(Nc2ncccc2C(=O)O[H])nccc1
A1510	*C(=O)c1cnc(Nc2ncc(C(=O)O[H])cc2)cc1
A1511	*C(=O)c1ccnc(Nc2nccc(C(=O)O[H])c2)c1
A1512	*C(=O)CC1(CC(=O)O[H])c2ccccc2C(C)(C)C1C
A1513	*C(=O)c1ccc(C(=O)O[H])c2c1C(C)(C)C(C)C2(C)C
A1514	*C(=O)CC1(C)c2ccccc2C(C)(CC(=O)O[H])C1C
A1515	*C(=O)c1ccc2c(sc3c(C)c(C(=O)O[H])ccc32)c1C
A1516	*C(=O)c1cc(C)c2sc3c(C)cc(C(=O)O[H])cc3c2c1
A1517	*C(=O)c1ccc(C)c2sc3c(C)ccc(C(=O)O[H])c3c12
A1518	*C(=O)Cc1cccc2c1sc1c(CC(=O)O[H])cccc12
A1519	*C(=O)c1ccc2c(c1)Sc1cc(C(=O)O[H])ccc1N2C
A1520	*C(=O)c1ccc2c(c1)N(C)c1cc(C(=O)O[H])ccc1S2
A1521	*C(=O)c1cccc2c1N(C)c1c(cccc1C(=O)O[H])S2
A1522	*C(=O)c1cccc2c1Sc1c(C(=O)O[H])cccc1N2C
A1523	*C(=O)c1cc(C)c2c(c1)CCc1cc(C(=O)O[H])cc(C)c1-2
A1524	*C(=O)c1ccc2c(c1C)-c1c(C)c(C(=O)O[H])ccc1CC2
A1525	*C(=O)Cc1cccc2c1-c1c(CC(=O)O[H])cccc1CC2
A1526	*C(=O)c1ccc(C)c2c1CCc1c(C(=O)O[H])ccc(C)c1-2
A1527	*C(=O)c1cc(C(=O)O[H])cc(N(CC)CC)c1
A1528	*C(=O)c1cccc(C(=O)O[H])c1N(CC)CC
A1529	*C(=O)C(N(c1ccccc1)C(C(=O)O[H])C)C
A1530	*C(=O)CCN(c1ccccc1)CCC(=O)O[H]
A1531	*C(=O)c1ccc2cc3cc(C(=O)O[H])ccc3cc2c1
A1532	*C(=O)c1ccc2cc3ccc(C(=O)O[H])cc3cc2c1
A1533	*C(=O)c1cccc2cc3cccc(C(=O)O[H])c3cc12
A1534	*C(=O)c1cccc2cc3c(C(=O)O[H])cccc3cc12
A1535	*C(=O)c1ccc(C(=O)O[H])c2cc3ccccc3cc12
A1536	*C(=O)c1c2ccccc2c(C(=O)O[H])c2ccccc12
A1537	*C(=O)c1ccc(C(=O)O[H])c(OC)c1OC
A1538	*C(=O)COc1ccccc1OCC(=O)O[H]
A1539	*C(=O)CCN(c1ccc(N=O)cc1)CCC(=O)O[H]
A1540	*C(=O)c1cc(C(=O)O[H])cc(C(C)CC)c1
A1541	*C(=O)c1cccc(C(=O)O[H])c1C(C)CC
A1542	*C(=O)c1ccc(C(=O)CC(=O)c2ccc(C(=O)O[H])cc2)cc1
A1543	*C(=O)c1ccccc1C(=O)CC(=O)c1ccccc1C(=O)O[H]
A1544	*C(=O)c1cccc(C(=O)CC(=O)c2cccc(C(=O)O[H])c2)c1
A1545	*C(=O)c1ccc(CCCCc2ccc(C(=O)O[H])cc2)cc1
A1546	*C(=O)c1ccccc1CCCCc1ccccc1C(=O)O[H]
A1547	*C(=O)c1cccc(CCCCc2cccc(C(=O)O[H])c2)c1
A1548	*C(=O)C(=NCCCN=C(C(=O)O[H])c1ccccc1)c1ccccc1
A1549	*C(=O)c1cccc(C=NCCCN=Cc2cccc(C(=O)O[H])c2)c1
A1550	*C(=O)c1ccc(C=NCCCN=Cc2ccc(C(=O)O[H])cc2)cc1
A1551	*C(=O)c1ccccc1C=NCCCN=Cc1ccccc1C(=O)O[H]
A1552	*C(=O)c1ccc2sc(SSc3nc4cc(C(=O)O[H])ccc4s3)nc2c1
A1553	*C(=O)c1cccc2sc(SSc3nc4c(C(=O)O[H])cccc4s3)nc12
A1554	*C(=O)c1ccc2nc(SSc3nc4ccc(C(=O)O[H])cc4s3)sc2c1
A1555	*C(=O)c1cccc2nc(SSc3nc4cccc(C(=O)O[H])c4s3)sc12
A1556	*C(=O)N1C(=O)C(=O)N(C(=O)O[H])C1=O
A1557	*C(=O)C1C(=O)C(C(=O)O[H])CC1
A1558	*C(=O)C1CC(=O)CC1C(=O)O[H]
A1559	*C(=O)N1C(=O)N(C(=O)O[H])CC1
A1560	*C(=O)C1NC(=O)NC1C(=O)O[H]
A1561	*C(=O)CC(c1cccc(C(C)(CC(=O)O[H])CC)c1)(C)CC
A1562	*C(=O)C(C)C(c1cccc(C(C)(C)C(C(=O)O[H])C)c1)(C)C
A1563	*C(=O)CCC(c1cccc(C(C)(C)CCC(=O)O[H])c1)(C)C
A1564	*C(=O)c1ccc2c(C#N)c3ccc(C(=O)O[H])cc3cc2c1
A1565	*C(=O)c1cccc2c(C#N)c3cccc(C(=O)O[H])c3cc12
A1566	*C(=O)c1ccc2cc3ccc(C(=O)O[H])cc3c(C#N)c2c1
A1567	*C(=O)c1cccc2cc3cccc(C(=O)O[H])c3c(C#N)c12
A1568	*C(=O)c1ccc2c(c1)Cc1cc(C(=O)O[H])ccc1CC2
A1569	*C(=O)c1ccc2c(c1)CCc1cc(C(=O)O[H])ccc1C2
A1570	*C(=O)c1cccc2c1CCc1c(C(=O)O[H])cccc1C2
A1571	*C(=O)c1cccc2c1Cc1c(C(=O)O[H])cccc1CC2
A1572	*C(=O)c1ccc2c(c1)C(=O)c1cc(C(=O)O[H])ccc1CC2
A1573	*C(=O)c1ccc2c(c1)CCc1cc(C(=O)O[H])ccc1C2=O
A1574	*C(=O)c1cccc2c1CCc1c(C(=O)O[H])cccc1C2=O
A1575	*C(=O)c1cccc2c1C(=O)c1c(C(=O)O[H])cccc1CC2
A1576	*C(=O)c1ccccc1C(=C)c1ccccc1C(=O)O[H]
A1577	*C(=O)c1cccc(C(=C)c2cccc(C(=O)O[H])c2)c1
A1578	*C(=O)c1ccc(C(=C)c2ccc(C(=O)O[H])cc2)cc1
A1579	*C(=O)C1(NC(=S)NC2(C(=O)O[H])CCCCC2)CCCCC1
A1580	*C(=O)c1cc(C)c(OP(=O)(Oc2c(C)cccc2C)Oc2c(C)cc(C(=O)O[H])cc2C)c(C)c1
A1581	*C(=O)Cc1cccc(CC(=O)O[H])c1OP(=O)(Oc1c(C)cccc1C)Oc1c(C)cccc1C
A1582	*C(=O)Cc1cccc(C)c1OP(=O)(Oc1c(C)cccc1C)Oc1c(C)cccc1CC(=O)O[H]
A1583	*C(=O)c1ccc(C)c(OP(=O)(Oc2c(C)cccc2C)Oc2c(C)ccc(C(=O)O[H])c2C)c1C
A1584	*C(=O)c1cc(S(=O)=O)ccc1Oc1ccc(S(=O)=O)cc1C(=O)O[H]
A1585	*C(=O)c1cc(Oc2ccc(S(=O)=O)c(C(=O)O[H])c2)ccc1S(=O)=O
A1586	*C(=O)S(=O)(=O)c1ccc(Oc2ccc(S(=O)(=O)C(=O)O[H])cc2)cc1
A1587	*C(=O)CN(c1cccc(C)c1)CC(=O)O[H]
A1588	*C(=O)c1cc(C(=O)O[H])cc(CCC)c1
A1589	*C(=O)c1cccc(C(=O)O[H])c1CCC
A1590	*C(=O)c1cc(C(=O)C(=O)c2ccc(OC)c(C(=O)O[H])c2)ccc1OC
A1591	*C(=O)COc1ccc(C(=O)C(=O)c2ccc(OCC(=O)O[H])cc2)cc1
A1592	*C(=O)c1cc(OC)ccc1C(=O)C(=O)c1ccc(OC)cc1C(=O)O[H]
A1593	*C(=O)c1cc(N(C)C)ccc1C(=S)c1ccc(N(C)C)cc1C(=O)O[H]
A1594	*C(=O)c1cc(C(=S)c2ccc(N(C)C)c(C(=O)O[H])c2)ccc1N(C)C
A1595	*C(=O)CN(c1ccc(C(=S)c2ccc(N(C)CC(=O)O[H])cc2)cc1)C
A1596	*C(=O)c1cc(C)cc(C(=O)O[H])c1C(=O)C
A1597	*C(=O)c1cc(C(=O)C)cc(C(=O)O[H])c1C
A1598	*C(=O)c1cc(C(=O)O[H])cc(C(C)C)c1
A1599	*C(=O)c1cccc(C(=O)O[H])c1C(C)C
A1600	*C(=O)CC(c1ccccc1)CC(=O)O[H]
A1601	*C(=O)COC(OCC(=O)O[H])CNC
A1602	*C(=O)CN(C1=CC(=O)CC(C)(C)C1)CC(=O)O[H]
A1603	*C(=O)CC1(CC(=O)O[H])CC(=O)C=C(N(C)C)C1
A1604	*C(=O)CCOC(OCCC(=O)O[H])CC(OCC)CC
A1605	*C(=O)C(OC(OC(C(=O)O[H])C)CC(OCC)CC)C
A1606	*C(=O)N(c1ncnc(N(C(=O)O[H])CC)n1)CC
A1607	*C(=O)C(Nc1ncnc(NC(C(=O)O[H])C)n1)C
A1608	*C(=O)CCNc1ncnc(NCCC(=O)O[H])n1
A1609	*C(=O)C(OC(OCC)OC(C(=O)O[H])C)C
A1610	*C(=O)CCOC(OCC)OCCC(=O)O[H]
A1611	*C(=O)CCOP(OCCC(=O)O[H])CC
A1612	*C(=O)c1ccc(NNc2ccc(C(=O)O[H])cc2)cc1
A1613	*C(=O)c1cccc(NNc2cccc(C(=O)O[H])c2)c1
A1614	*C(=O)c1ccccc1NNc1ccccc1C(=O)O[H]
A1615	*C(=O)C(=CCC=C(C(=O)O[H])c1ccccc1)c1ccccc1
A1616	*C(=O)c1cccc(C=CCC=Cc2cccc(C(=O)O[H])c2)c1
A1617	*C(=O)c1ccccc1C=CCC=Cc1ccccc1C(=O)O[H]
A1618	*C(=O)c1ccc(C=CCC=Cc2ccc(C(=O)O[H])cc2)cc1
A1619	*C(=O)c1cc(OCC)c(C(=O)O[H])cc1OCC
A1620	*C(=O)C(Oc1ccc(OC(C(=O)O[H])C)cc1)C
A1621	*C(=O)CCOc1ccc(OCCC(=O)O[H])cc1
A1622	*C(=O)CCN1CCN(CCC(=O)O[H])CC1
A1623	*C(=O)C(N1CCN(C(C(=O)O[H])C)CC1)C
A1624	*C(=O)C1N(CC)CC(C(=O)O[H])N(CC)C1
A1625	*C(=O)c1ccc2cccc(C=Cc3cccc4ccc(C(=O)O[H])cc34)c2c1
A1626	*C(=O)c1cccc2cccc(C=Cc3cccc4cccc(C(=O)O[H])c34)c12
A1627	*C(=O)c1ccc2ccccc2c1C=Cc1c(C(=O)O[H])ccc2ccccc12
A1628	*C(=O)c1cc(C=Cc2cc(C(=O)O[H])cc3ccccc23)c2ccccc2c1
A1629	*C(=O)c1ccc(C=Cc2ccc(C(=O)O[H])c3ccccc23)c2ccccc12
A1630	*C(=O)c1cccc2c(C=Cc3ccc(C(=O)O[H])c4ccccc34)cccc12
A1631	*C(=O)c1cccc2c(C=Cc3cccc4c(C(=O)O[H])cccc34)cccc12
A1632	*C(=O)c1ccc2c(C=Cc3cccc4cc(C(=O)O[H])ccc34)cccc2c1
A1633	*C(=O)C1N(CCC)C(C(=O)O[H])CC1
A1634	*C(=O)CCC(CCC(=O)O[H])CCCCCC(CC)CCCC
A1635	*C(=O)CCCCCCCCCCCCCCSCCCCCCCCCCCCCCC(=O)O[H]
A1636	*C(=O)C(CCCCSCCCCC(C(=O)O[H])CCCCCCCCC)CCCCCCCCC
A1637	*C(=O)C(C)CCCCCCCCCCCCSCCCCCCCCCCCCC(C(=O)O[H])C
A1638	*C(=O)C(CC)CCCCCCCCCCCSCCCCCCCCCCCC(C(=O)O[H])CC
A1639	*C(=O)C(CCC)CCCCCCCCCCSCCCCCCCCCCC(C(=O)O[H])CCC
A1640	*C(=O)C(CCCC)CCCCCCCCCSCCCCCCCCCC(C(=O)O[H])CCCC
A1641	*C(=O)C(CCCCC)CCCCCCCCSCCCCCCCCC(C(=O)O[H])CCCCC
A1642	*C(=O)C(CCCCCC)CCCCCCCSCCCCCCCC(C(=O)O[H])CCCCCC
A1643	*C(=O)C(CCCCCCSCCCCCCC(C(=O)O[H])CCCCCCC)CCCCCCC
A1644	*C(=O)C(CCCCCSCCCCCC(C(=O)O[H])CCCCCCCC)CCCCCCCC
A1645	*C(=O)c1nnc(C(=O)O[H])cc1
A1646	*C(=O)c1cnncc1C(=O)O[H]
A1647	*C(=O)CC(C=C(C)CC(C)(C)C)(C)CC(=O)O[H]
A1648	*C(=O)CC(C)(CC(=O)O[H])CC(=CC(C)(C)C)C
A1649	*C(=O)CC(=O)CC(=O)CC(=O)O[H]
A1650	*C(=O)CC1OC(C)OC1CC(=O)O[H]
A1651	*C(=O)CN(CC(=O)O[H])CCNCC
A1652	*C(=O)C1NC(C(=O)O[H])CSC1
A1653	*C(=O)CC(OOCC)(C)CC(=O)O[H]
A1654	*C(=O)C=CCNCC=CC(=O)O[H]
A1655	*C(=O)C(=C)CNCC(C(=O)O[H])=C
A1656	*C(=O)CC1(CC(=O)O[H])CCCC1C
A1657	*C(=O)CCC(C)(CCC(=O)O[H])C(OC)(CC)CC
A1658	*C(=O)CCC(OC)(CCC(=O)O[H])C(C)(CC)CC
A1659	*C(=O)c1ccc(C(c2ccc(C(=O)O[H])cc2)N2CCC2)cc1
A1660	*C(=O)c1cccc(C(c2cccc(C(=O)O[H])c2)N2CCC2)c1
A1661	*C(=O)c1ccccc1C(c1ccccc1C(=O)O[H])N1CCC1
A1662	*C(=O)C(c1ccc(C)c(C2(c3cc(C(C(=O)O[H])(C)C)ccc3C)c3ccccc32)c1)(C)C
A1663	*C(=O)CC(c1ccc(C)c(C2(c3cc(C(C)CC(=O)O[H])ccc3C)c3ccccc32)c1)C
A1664	*C(=O)c1cc(C)c(C2(c3cc(C(C)C)c(C(=O)O[H])cc3C)c3ccccc32)cc1C(C)C
A1665	*C(=O)c1cc(C(C)C)cc(C2(c3cc(C(C)C)cc(C(=O)O[H])c3C)c3ccccc32)c1C
A1666	*C(=O)Cc1ccc(C(C)C)cc1C1(c2cc(C(C)C)ccc2CC(=O)O[H])c2ccccc21
A1667	*C(=O)c1c(C2(c3c(C(=O)O[H])c(C(C)C)ccc3C)c3ccccc32)c(C)ccc1C(C)C
A1668	*C(=O)CCC1(CCC(=O)O[H])C(=O)NCC(C)C1=O
A1669	*C(=O)CN1C(=O)N(C)CN(CN2CN(C)C(=O)N(CC(=O)O[H])C2)C1
A1670	*C(=O)CN1C(=O)N(CC(=O)O[H])CN(CN2CN(C)C(=O)N(C)C2)C1
A1671	*C(=O)CC(CC(=O)O[H])CC(=CC(C)C)C
A1672	*C(=O)CC(C=C(C)CC(C)C)CC(=O)O[H]
A1673	*C(=O)c1ccc(C(c2ccc(C(=O)O[H])cc2)(C)CC)cc1
A1674	*C(=O)c1cccc(C(c2cccc(C(=O)O[H])c2)(C)CC)c1
A1675	*C(=O)c1ccccc1C(c1ccccc1C(=O)O[H])(C)CC
A1676	*C(=O)CCCCCCCCCC(CCCCCCCC)CCCCCCCCCC(=O)O[H]
A1677	*C(=O)C(C)CCCCCCCC(CCCCCCCC)CCCCCCCC(C(=O)O[H])C
A1678	*C(=O)C(CC)CCCCCCC(CCCCCCCC)CCCCCCC(C(=O)O[H])CC
A1679	*C(=O)C(CCC)CCCCCC(CCCCCCCC)CCCCCC(C(=O)O[H])CCC
A1680	*C(=O)C(CCCC)CCCCC(CCCCCCCC)CCCCC(C(=O)O[H])CCCC
A1681	*C(=O)C(CCCCC)CCCC(CCCCCCCC)CCCC(C(=O)O[H])CCCCC
A1682	*C(=O)C(CCCCCC)CCC(CCCCCCCC)CCC(C(=O)O[H])CCCCCC
A1683	*C(=O)C1CC2(C1)CC(C(=O)O[H])C2
A1684	*C(=O)CCOP(=S)(OCCC(=O)O[H])CC
A1685	*C(=O)C(OP(=S)(OC(C(=O)O[H])C)CC)C
A1686	*C(=O)CC(C)COP(=O)(OCC(C)CC(=O)O[H])CC(C)C
A1687	*C(=O)C(C)(C)COP(=O)(OCC(C(=O)O[H])(C)C)CC(C)C
A1688	*C(=O)C(OP(=O)(OC(C(=O)O[H])C(C)C)CC(C)C)C(C)C
A1689	*C(=O)CCCCOP(=O)(OCCCCC(=O)O[H])CCCC
A1690	*C(=O)C(C)CCOP(=O)(OCCC(C(=O)O[H])C)CCCC
A1691	*C(=O)C(COP(=O)(OCC(C(=O)O[H])CC)CCCC)CC
A1692	*C(=O)C(OP(=O)(OC(C(=O)O[H])CCC)CCCC)CCC
A1693	*C(=O)C1C(=O)CC(=O)C(C(=O)O[H])C1(C)C
A1694	*C(=O)CC1(CC(=O)O[H])CC(=O)CC(=O)C1
A1695	*C(=O)CC(OCC)(CC(=O)O[H])CC
A1696	*C(=O)CC(C#CC(CC(=O)O[H])CC(C)C)CC(C)C
A1697	*C(=O)CC(=N)CC(=O)O[H]
A1698	*C(=O)CN(C(=O)C)CC(=O)O[H]
A1699	*C(=O)CC1(CC(=O)O[H])C(=O)N1C
A1700	*C(=O)c1c(C)c(C(=O)O[H])c(C(C)(C)C)cc1C(C)(C)C
A1701	*C(=O)CC(c1cc(C)cc(C(C)(C)C)c1)(C)CC(=O)O[H]
A1702	*C(=O)CC(c1cc(C)cc(C(C)(C)CC(=O)O[H])c1)(C)C
A1703	*C(=O)c1ccc2c(c1)C(=O)c1ccc3c4c(ccc-2c14)C(=O)c1cc(C(=O)O[H])ccc1-3
A1704	*C(=O)c1cc2c3c(c(C(=O)O[H])cc4c3c1C(=O)c1ccccc1-4)C(=O)c1ccccc1-2
A1705	*C(=O)c1cc2c3c(c(C(=O)O[H])cc4c3c1-c1ccccc1C4=O)-c1ccccc1C2=O
A1706	*C(=O)c1ccc2c(c1)-c1ccc3c4c(ccc(c14)C2=O)-c1cc(C(=O)O[H])ccc1C3=O
A1707	*C(=O)c1cccc2c1-c1ccc3c4c(ccc(c14)C2=O)-c1c(C(=O)O[H])cccc1C3=O
A1708	*C(=O)c1cccc2c1C(=O)c1ccc3c4c(ccc-2c14)C(=O)c1c(C(=O)O[H])cccc1-3
A1709	*C(=O)C1=C(C2=C(C(=O)O[H])C(=O)C(C)=CC2=O)C(=O)C=C(C)C1=O
A1710	*C(=O)CC1=CC(=O)C(C2=CC(=O)C(CC(=O)O[H])=CC2=O)=CC1=O
A1711	*C(=O)C1=C(C)C(=O)C=C(C2=CC(=O)C(C)=C(C(=O)O[H])C2=O)C1=O
A1712	*C(=O)CC(C)(CC(=O)O[H])CC(C(=O)C)(C)C
A1713	*C(=O)CC(C(=O)C)(CC(=O)O[H])CC(C)(C)C
A1714	*C(=O)CCCCCCCC(CCC)CCCCCCCC(=O)O[H]
A1715	*C(=O)C(C)CCCCCC(CCC)CCCCCC(C(=O)O[H])C
A1716	*C(=O)C(CC)CCCCC(CCC)CCCCC(C(=O)O[H])CC
A1717	*C(=O)C(CCC)CCCC(CCC)CCCC(C(=O)O[H])CCC
A1718	*C(=O)C(CCCC)CCC(CCC)CCC(C(=O)O[H])CCCC
A1719	*C(=O)c1cc2ccc3cc(C(=O)O[H])cc4ccc(c1)c2c34
A1720	*C(=O)c1ccc2ccc3ccc(C(=O)O[H])c4ccc1c2c34
A1721	*C(=O)c1ccc2ccc3c(C(=O)O[H])ccc4ccc1c2c43
A1722	*C(=O)c1cc2cccc3c(C(=O)O[H])cc4cccc1c4c23
A1723	*C(=O)c1cc2cccc3cc(C(=O)O[H])c4cccc1c4c23
A1724	*C(=O)c1cccc2c1C=Cc1c(C(=O)O[H])cccc1C2=C1CCN(C)CC1
A1725	*C(=O)c1ccc2c(c1)C=Cc1cc(C(=O)O[H])ccc1C2=C1CCN(C)CC1
A1726	*C(=O)c1ccc2c(c1)C(=C1CCN(C)CC1)c1cc(C(=O)O[H])ccc1C=C2
A1727	*C(=O)c1cccc2c1C(=C1CCN(C)CC1)c1c(C(=O)O[H])cccc1C=C2
A1728	*C(=O)CN(c1ccc(C(c2ccccc2)c2ccc(N(C)CC(=O)O[H])cc2)cc1)C
A1729	*C(=O)c1cc(C(c2ccccc2)c2ccc(N(C)C)c(C(=O)O[H])c2)ccc1N(C)C
A1730	*C(=O)c1cc(N(C)C)ccc1C(c1ccccc1)c1ccc(N(C)C)cc1C(=O)O[H]
A1731	*C(=O)C(OC(OC(C(=O)O[H])CCCC)C)CCCC
A1732	*C(=O)C(COC(OCC(C(=O)O[H])CCC)C)CCC
A1733	*C(=O)C(CC)CCOC(OCCC(C(=O)O[H])CC)C
A1734	*C(=O)C(C)CCCOC(OCCCC(C(=O)O[H])C)C
A1735	*C(=O)CCCCCOC(OCCCCCC(=O)O[H])C
A1736	*C(=O)C(OC(OC(C(=O)O[H])CCC)CC)CCC
A1737	*C(=O)C(COC(OCC(C(=O)O[H])CC)CC)CC
A1738	*C(=O)C(C)CCOC(OCCC(C(=O)O[H])C)CC
A1739	*C(=O)CCCCOC(OCCCCC(=O)O[H])CC
A1740	*C(=O)C(C)CC(OCCC)CC(C(=O)O[H])C
A1741	*C(=O)CCCC(OCCC)CCCC(=O)O[H]
A1742	*C(=O)CC(OC(OC(C)C)CCC)CC(=O)O[H]
A1743	*C(=O)C(OC(OC(C(=O)O[H])(C)C)CCC)(C)C
A1744	*C(=O)CC(OC(OC(C)CC(=O)O[H])CCC)C
A1745	*C(=O)C(OC(OC(C(=O)O[H])C(C)C)CCC)C(C)C
A1746	*C(=O)C(C)(C)COC(OCC(C(=O)O[H])(C)C)CCC
A1747	*C(=O)CC(C)COC(OCC(C)CC(=O)O[H])CCC
A1748	*C(=O)C=CC(C=CC(=O)O[H])CCCCCC
A1749	*C(=O)CC(C(=O)CCCC)CC(=O)O[H]
A1750	*C(=O)c1c(C)c(C(=O)O[H])c(C)c(N(C)C)c1C
A1751	*C(=O)Cc1cc(C)cc(CC(=O)O[H])c1N(C)C
A1752	*C(=O)CN(c1c(C)cc(C)cc1C)CC(=O)O[H]
A1753	*C(=O)C1CC2C1C1CC(C(=O)O[H])C21
A1754	*C(=O)C12CCC1C1(C(=O)O[H])CCC21
A1755	*C(=O)CCCC(=O)O[H]
A1756	*C(=O)c1cc(-c2cc(C(=O)O[H])cc(CC)c2)cc(CC)c1
A1757	*C(=O)CCc1cccc(-c2cccc(CCC(=O)O[H])c2)c1
A1758	*C(=O)c1c(-c2cccc(CC)c2C(=O)O[H])cccc1CC
A1759	*C(=O)c1ccc(CC)cc1-c1cc(CC)ccc1C(=O)O[H]
A1760	*C(=O)c1ccc(-c2ccc(C(=O)O[H])c(CC)c2)cc1CC
A1761	*C(=O)C(c1cccc(-c2cccc(C(C(=O)O[H])C)c2)c1)C
A1762	*C(=O)c1cc(-c2ccc(CC)c(C(=O)O[H])c2)ccc1CC
A1763	*C(=O)C(c1ccc(-c2ccc(C(C(=O)O[H])C)cc2)cc1)C
A1764	*C(=O)CCc1ccc(-c2ccc(CCC(=O)O[H])cc2)cc1
A1765	*C(=O)c1cc(C(C)(C)C)cc2c1Oc1c(C(=O)O[H])cc(C(C)(C)C)cc1C2(C)C
A1766	*C(=O)c1cc2c(cc1C(C)(C)C)C(C)(C)c1cc(C(C)(C)C)c(C(=O)O[H])cc1O2
A1767	*C(=O)CC(c1ccc2c(c1)C(C)(C)c1cc(C(C)(C)CC(=O)O[H])ccc1O2)(C)C
A1768	*C(=O)c1c2c(ccc1C(C)(C)C)Oc1ccc(C(C)(C)C)c(C(=O)O[H])c1C2(C)C
A1769	*C(=O)CCOP(=S)(OCCC(=O)O[H])SCSC(C)(C)C
A1770	*C(=O)c1cc(C)cc(C(CC)C(c2cc(C(=O)O[H])cc(C)c2)CC)c1
A1771	*C(=O)c1ccc(C)cc1C(CC)C(c1cc(C)ccc1C(=O)O[H])CC
A1772	*C(=O)c1ccc(C(CC)C(c2ccc(C(=O)O[H])c(C)c2)CC)cc1C
A1773	*C(=O)Cc1cccc(C(CC)C(c2cccc(CC(=O)O[H])c2)CC)c1
A1774	*C(=O)c1c(C)cccc1C(CC)C(c1cccc(C)c1C(=O)O[H])CC
A1775	*C(=O)C(C)C(c1cccc(C)c1)C(c1cccc(C)c1)C(C(=O)O[H])C
A1776	*C(=O)CCC(c1cccc(C)c1)C(c1cccc(C)c1)CCC(=O)O[H]
A1777	*C(=O)c1cc(CC)ccc1C(=C(c1ccc(CC)cc1C(=O)O[H])CC)CC
A1778	*C(=O)c1cc(C(=C(c2ccc(CC)c(C(=O)O[H])c2)CC)CC)ccc1CC
A1779	*C(=O)CCC(=C(c1ccc(CC)cc1)CCC(=O)O[H])c1ccc(CC)cc1
A1780	*C(=O)C(c1ccc(C(=C(c2ccc(C(C(=O)O[H])C)cc2)CC)CC)cc1)C
A1781	*C(=O)CCc1ccc(C(=C(c2ccc(CCC(=O)O[H])cc2)CC)CC)cc1
A1782	*C(=O)c1ccc2c(Cc3cccc4cc(C(=O)O[H])ccc34)cccc2c1
A1783	*C(=O)c1ccc(Cc2ccc(C(=O)O[H])c3ccccc23)c2ccccc12
A1784	*C(=O)c1cccc2c(Cc3ccc(C(=O)O[H])c4ccccc34)cccc12
A1785	*C(=O)c1cccc2c(Cc3cccc4c(C(=O)O[H])cccc34)cccc12
A1786	*C(=O)c1ccc2cccc(Cc3cccc4ccc(C(=O)O[H])cc34)c2c1
A1787	*C(=O)c1cccc2cccc(Cc3cccc4cccc(C(=O)O[H])c34)c12
A1788	*C(=O)c1ccc2ccccc2c1Cc1c(C(=O)O[H])ccc2ccccc12
A1789	*C(=O)c1cc(Cc2cc(C(=O)O[H])cc3ccccc23)c2ccccc2c1
A1790	*C(=O)c1ccc(N(C(=O)NC)c2ccc(C(=O)O[H])cc2)cc1
A1791	*C(=O)c1ccccc1N(C(=O)NC)c1ccccc1C(=O)O[H]
A1792	*C(=O)c1cccc(N(C(=O)NC)c2cccc(C(=O)O[H])c2)c1
A1793	*C(=O)CC(CC(=O)O[H])C1(C)CC1
A1794	*C(=O)C1C(C(=O)O[H])C1(C)C(C)C
A1795	*C(=O)CC1CCCCCC1CC(=O)O[H]
A1796	*C(=O)C1CCCC(C(=O)O[H])C(C)C1C
A1797	*C(=O)C1CC(C(=O)O[H])CC(C)C(C)C1
A1798	*C(=O)C1CCCCC(C(=O)O[H])C1CC
A1799	*C(=O)C1CCC(C(=O)O[H])CC(CC)C1
A1800	*C(=O)CCCCCCC(CCCCCCC(=O)O[H])C1CCCCC1
A1801	*C(=O)C(C)CCCCC(CCCCC(C(=O)O[H])C)C1CCCCC1
A1802	*C(=O)C(CC)CCCC(CCCC(C(=O)O[H])CC)C1CCCCC1
A1803	*C(=O)C(CCC)CCC(CCC(C(=O)O[H])CCC)C1CCCCC1
A1804	*C(=O)C(CCCC)CC(CC(C(=O)O[H])CCCC)C1CCCCC1
A1805	*C(=O)C1CCCCCC(C(=O)O[H])C1CC
A1806	*C(=O)C1CCCC(C(=O)O[H])CC(CC)C1
A1807	*C(=O)C1CCC(CC)CCC(C(=O)O[H])C1
A1808	*C(=O)C1CCC(C(=O)O[H])CC(CCCC)C1
A1809	*C(=O)CCN(C(=O)C=C(OP(=O)(OC)C)C)CCC(=O)O[H]
A1810	*C(=O)C=CCc1ccccc1CC=CC(=O)O[H]
A1811	*C(=O)C(=C)Cc1ccccc1CC(C(=O)O[H])=C
A1812	*C(=O)C(C=C)c1ccccc1C(C(=O)O[H])C=C
A1813	*C(=O)c1ccc(C(=O)O[H])c(CC=C)c1CC=C
A1814	*C(=O)C(Cc1ccccc1CC(C(=O)O[H])CCC)CCC
A1815	*C(=O)C(CC)CCc1ccccc1CCC(C(=O)O[H])CC
A1816	*C(=O)C(C)CCCc1ccccc1CCCC(C(=O)O[H])C
A1817	*C(=O)CCCCCc1ccccc1CCCCCC(=O)O[H]
A1818	*C(=O)c1cc(C(=O)c2ccc(OC)c(C(=O)O[H])c2)ccc1OC
A1819	*C(=O)COc1ccc(C(=O)c2ccc(OCC(=O)O[H])cc2)cc1
A1820	*C(=O)c1cc(OC)ccc1C(=O)c1ccc(OC)cc1C(=O)O[H]
A1821	*C(=O)c1cccc2c(N=O)ccc(C(=O)O[H])c12
A1822	*C(=O)CC(CC(=O)O[H])CNCC
A1823	*C(=O)Cc1cc(C)cc(CC(=O)O[H])c1S(=O)(=O)c1ccc(C)cc1C
A1824	*C(=O)c1ccc2c(S(=O)(=O)c3cccc4cc(C(=O)O[H])ccc34)cccc2c1
A1825	*C(=O)c1ccc2ccccc2c1S(=O)(=O)c1c(C(=O)O[H])ccc2ccccc12
A1826	*C(=O)c1cc(S(=O)(=O)c2cc(C(=O)O[H])cc3ccccc23)c2ccccc2c1
A1827	*C(=O)c1ccc(S(=O)(=O)c2ccc(C(=O)O[H])c3ccccc23)c2ccccc12
A1828	*C(=O)c1cccc2c(S(=O)(=O)c3ccc(C(=O)O[H])c4ccccc34)cccc12
A1829	*C(=O)c1cccc2c(S(=O)(=O)c3cccc4c(C(=O)O[H])cccc34)cccc12
A1830	*C(=O)c1ccc2cccc(S(=O)(=O)c3cccc4ccc(C(=O)O[H])cc34)c2c1
A1831	*C(=O)c1cccc2cccc(S(=O)(=O)c3cccc4cccc(C(=O)O[H])c34)c12
A1832	*C(=O)CC(OC(OC(C)C)C(C)C)CC(=O)O[H]
A1833	*C(=O)CC(OC(OC(C)CC(=O)O[H])C(C)C)C
A1834	*C(=O)CC(C(OC(C)C)OC(C)C)CC(=O)O[H]
A1835	*C(=O)C(OC(OC(C(=O)O[H])(C)C)C(C)C)(C)C
A1836	*C(=O)CCC(CC)CCCC(CC)CCC(=O)O[H]
A1837	*C(=O)CCC(CCC(=O)O[H])CCCC(CC)CC
A1838	*C(=O)C(C)C(CC)CCCC(CC)C(C(=O)O[H])C
A1839	*C(=O)C(CC)(CC)CCCC(C(=O)O[H])(CC)CC
A1840	*C(=O)CC(C)CCCCCCCCC(C)CC(=O)O[H]
A1841	*C(=O)C(C)(C)CCCCCCCCC(C(=O)O[H])(C)C
A1842	*C(=O)C(CCCCCCC(C(=O)O[H])C(C)C)C(C)C
A1843	*C(=O)C(CCCCC(C(=O)O[H])CC(C)C)CC(C)C
A1844	*C(=O)CCC(CC)CCCCCC(CC)CCC(=O)O[H]
A1845	*C(=O)CCC(CCC(=O)O[H])CCCCCC(CC)CC
A1846	*C(=O)C(C)C(CC)CCCCCC(CC)C(C(=O)O[H])C
A1847	*C(=O)C(CC)(CC)CCCCCC(C(=O)O[H])(CC)CC
A1848	*C(=O)C(CCCC(C(=O)O[H])C(CC)CC)C(CC)CC
A1849	*C(=O)CCC(CCC(=O)O[H])CCCCCCCCCC
A1850	*C(=O)C(C)CC(CCCCCCCCCC)CC(C(=O)O[H])C
A1851	*C(=O)CCCC(CCCC(=O)O[H])CCCCCCCCCC
A1852	*C(=O)CC(SC)(CC(=O)O[H])CC
A1853	*C(=O)CCC(CC)CCCCCCCCC(CC)CCC(=O)O[H]
A1854	*C(=O)CCC(CCC(=O)O[H])CCCCCCCCC(CC)CC
A1855	*C(=O)C(C)C(CC)CCCCCCCCC(CC)C(C(=O)O[H])C
A1856	*C(=O)C(CC)(CC)CCCCCCCCC(C(=O)O[H])(CC)CC
A1857	*C(=O)C(CCCCCCC(C(=O)O[H])C(CC)CC)C(CC)CC
A1858	*C(=O)C(CCCCC(C(=O)O[H])CC(CC)CC)CC(CC)CC
A1859	*C(=O)C(C)CCC(CCCCCCCCCC)CCC(C(=O)O[H])C
A1860	*C(=O)CCCCC(CCCCC(=O)O[H])CCCCCCCCCC
A1861	*C(=O)CCCC(CCC)CCCCCC(CCC)CCCC(=O)O[H]
A1862	*C(=O)CCCC(CCCC(=O)O[H])CCCCCC(CCC)CCC
A1863	*C(=O)C(C)CC(CCCCCC(CCC)CCC)CC(C(=O)O[H])C
A1864	*C(=O)C(C)CC(CCC)CCCCCC(CCC)CC(C(=O)O[H])C
A1865	*C(=O)C(CC)C(CCC)CCCCCC(CCC)C(C(=O)O[H])CC
A1866	*C(=O)C(CCC)(CCC)CCCCCC(C(=O)O[H])(CCC)CCC
A1867	*C(=O)C(CCCC(C(=O)O[H])C(CCC)CCC)C(CCC)CCC
A1868	*C(=O)CCCCC(CCCC)CCCCC(CCCC)CCCCC(=O)O[H]
A1869	*C(=O)CCCCC(CCCCC(=O)O[H])CCCCC(CCCC)CCCC
A1870	*C(=O)C(CC)CC(CCCCC(CCCC)CCCC)CC(C(=O)O[H])CC
A1871	*C(=O)C(C)CCC(CCCCC(CCCC)CCCC)CCC(C(=O)O[H])C
A1872	*C(=O)C(C)CCC(CCCC)CCCCC(CCCC)CCC(C(=O)O[H])C
A1873	*C(=O)C(CC)CC(CCCC)CCCCC(CCCC)CC(C(=O)O[H])CC
A1874	*C(=O)C(CCC)C(CCCC)CCCCC(CCCC)C(C(=O)O[H])CCC
A1875	*C(=O)C(CCCC)(CCCC)CCCCC(C(=O)O[H])(CCCC)CCCC
A1876	*C(=O)C(C)CCC(CCCCCCCCCCCCCCC)CCC(C(=O)O[H])C
A1877	*C(=O)CCCCC(CCCCC(=O)O[H])CCCCCCCCCCCCCCC
A1878	*C(=O)CCCCCC(CCCCCC(=O)O[H])CCCCCC(CCCCC)CCCCC
A1879	*C(=O)CCCCCC(CCCCC)CCCCCC(CCCCC)CCCCCC(=O)O[H]
A1880	*C(=O)C(C)CCCC(CCCCC)CCCCCC(CCCCC)CCCC(C(=O)O[H])C
A1881	*C(=O)C(C)CCCC(CCCCCC(CCCCC)CCCCC)CCCC(C(=O)O[H])C
A1882	*C(=O)C(CC)CCC(CCCCCC(CCCCC)CCCCC)CCC(C(=O)O[H])CC
A1883	*C(=O)C(CC)CCC(CCCCC)CCCCCC(CCCCC)CCC(C(=O)O[H])CC
A1884	*C(=O)C(CCC)CC(CCCCC)CCCCCC(CCCCC)CC(C(=O)O[H])CCC
A1885	*C(=O)C(CCCC)C(CCCCC)CCCCCC(CCCCC)C(C(=O)O[H])CCCC
A1886	*C(=O)C(CCCCC)(CCCCC)CCCCCC(C(=O)O[H])(CCCCC)CCCCC
A1887	*C(=O)C(CCCCC)CCC(CCCCCCCCCC)CCC(C(=O)O[H])CCCCC
A1888	*C(=O)C(CCCC)CCCC(CCCCCCCCCC)CCCC(C(=O)O[H])CCCC
A1889	*C(=O)C(CCC)CCCCC(CCCCCCCCCC)CCCCC(C(=O)O[H])CCC
A1890	*C(=O)C(CC)CCCCCC(CCCCCCCCCC)CCCCCC(C(=O)O[H])CC
A1891	*C(=O)C(C)CCCCCCC(CCCCCCCCCC)CCCCCCC(C(=O)O[H])C
A1892	*C(=O)CCCCCCCCC(CCCCCCCCC(=O)O[H])CCCCCCCCCC
A1893	*C(=O)C1CCCC(C(CCCCCCCCCCCCCCC)C2CCCC(C(=O)O[H])C2)C1
A1894	*C(=O)C1CCC(C(CCCCCCCCCCCCCCC)C2CCC(C(=O)O[H])CC2)CC1
A1895	*C(=O)C(=C(CC)CCCCCCCCC(=C(C(=O)O[H])C)CC)C
A1896	*C(=O)CC=C(CC)CCCCCCCCC(=CCC(=O)O[H])CC
A1897	*C(=O)C(C(=CC)CCCCCCCCC(=CC)C(C(=O)O[H])C)C
A1898	*C(=O)CCC(=CC)CCCCCCCCC(=CC)CCC(=O)O[H]
A1899	*C(=O)C(C(=CC)CC)CCCCCCC(C(=O)O[H])C(=CC)CC
A1900	*C(=O)C(CC(=CC)CC)CCCCC(C(=O)O[H])CC(=CC)CC
A1901	*C(=O)c1cccc(CC(=CCCCCCCCCCCCCCC)Cc2cccc(C(=O)O[H])c2)c1
A1902	*C(=O)c1ccc(CC(=CCCCCCCCCCCCCCC)Cc2ccc(C(=O)O[H])cc2)cc1
A1903	*C(=O)c1ccc(P(=O)(c2ccccc2)c2ccc(C(=O)O[H])cc2)cc1
A1904	*C(=O)c1cccc(P(=O)(c2ccccc2)c2cccc(C(=O)O[H])c2)c1
A1905	*C(=O)c1ccccc1P(=O)(c1ccccc1)c1ccccc1C(=O)O[H]
A1906	*C(=O)c1ccc2c(oc3cc(C(=O)O[H])ccc32)c1
A1907	*C(=O)c1ccc2oc3ccc(C(=O)O[H])cc3c2c1
A1908	*C(=O)c1cccc2oc3cccc(C(=O)O[H])c3c12
A1909	*C(=O)c1cccc2c1oc1c(C(=O)O[H])cccc12
A1910	*C(=O)c1ccc2c(sc3cc(C(=O)O[H])ccc32)c1
A1911	*C(=O)c1ccc2sc3ccc(C(=O)O[H])cc3c2c1
A1912	*C(=O)c1cccc2sc3cccc(C(=O)O[H])c3c12
A1913	*C(=O)c1cccc2c1sc1c(C(=O)O[H])cccc12
A1914	*C(=O)CC(C)(CC(=O)O[H])C1CCC1
A1915	*C(=O)C1CC(C(=O)O[H])C1C(C)(C)C
A1916	*C(=O)c1cc2c3ccccc3cc3c(C(=O)O[H])cc4cccc1c4c32
A1917	*C(=O)CC(CC(=O)O[H])CCC#N
A1918	*C(=O)CC(C)(CC#C)CC(=O)O[H]
A1919	*C(=O)C(C)(C)CN(c1ccccc1)CC(C(=O)O[H])(C)C
A1920	*C(=O)CC(C)CN(c1ccccc1)CC(C)CC(=O)O[H]
A1921	*C(=O)c1ccc(N=NC(C)(C)C(N=Nc2ccc(C(=O)O[H])cc2)(C)C)cc1
A1922	*C(=O)c1ccccc1N=NC(C)(C)C(N=Nc1ccccc1C(=O)O[H])(C)C
A1923	*C(=O)c1cccc(N=NC(C)(C)C(N=Nc2cccc(C(=O)O[H])c2)(C)C)c1
A1924	*C(=O)CC1(CC(=O)O[H])C=C(C)C(=O)CC1
A1925	*C(=O)c1ccc(C(=O)O[H])c2c1C(=O)N(SC)C2=O
A1926	*C(=O)CCC(CC)CCC(=O)O[H]
A1927	*C(=O)C(C)C(CC)C(C(=O)O[H])C
A1928	*C(=O)C1CC(C(=O)O[H])C1C
A1929	*C(=O)CN(C(=O)CCCCCCCC(=O)N(C)CC(=O)O[H])C
A1930	*C(=O)C(C(=O)N(C)C)CCCCCC(C(=O)O[H])C(=O)N(C)C
A1931	*C(=O)C(CC(=O)N(C)C)CCCC(C(=O)O[H])CC(=O)N(C)C
A1932	*C(=O)CC(C=C)(CC(=O)O[H])CC(C)C
A1933	*C(=O)CC(CC(=O)O[H])CC(C=C)(C)C
A1934	*C(=O)CS(NC(=O)C)(C)CC(=O)O[H]
A1935	*C(=O)CC(n1nnc(C=C)n1)(C)CC(=O)O[H]
A1936	*C(=O)C1N(CC)C(C(=O)O[H])CCC1
A1937	*C(=O)C1CN(CC)CC(C(=O)O[H])C1
A1938	*C(=O)CN(c1nc(N(C)CC(=O)O[H])nc(N2CCCC2)n1)C
A1939	*C(=O)CCCCC(CCCC)CCCCCC(CCCC)CCCCC(=O)O[H]
A1940	*C(=O)CCCCC(CCCCC(=O)O[H])CCCCCC(CCCC)CCCC
A1941	*C(=O)C(C)CCC(CCCCCC(CCCC)CCCC)CCC(C(=O)O[H])C
A1942	*C(=O)C(C)CCC(CCCC)CCCCCC(CCCC)CCC(C(=O)O[H])C
A1943	*C(=O)C(CC)CC(CCCC)CCCCCC(CCCC)CC(C(=O)O[H])CC
A1944	*C(=O)C(CCC)C(CCCC)CCCCCC(CCCC)C(C(=O)O[H])CCC
A1945	*C(=O)C(CCCC)(CCCC)CCCCCC(C(=O)O[H])(CCCC)CCCC
A1946	*C(=O)c1ccc(C(c2ccc(C(=O)O[H])cc2)CCCCCCCCCCCCCCC)cc1
A1947	*C(=O)c1cccc(C(c2cccc(C(=O)O[H])c2)CCCCCCCCCCCCCCC)c1
A1948	*C(=O)c1ccc(CC(Cc2ccc(C(=O)O[H])cc2)CCCCCCCCCCCCCCC)cc1
A1949	*C(=O)c1cccc(CC(Cc2cccc(C(=O)O[H])c2)CCCCCCCCCCCCCCC)c1
A1950	*C(=O)c1cccc(C(=CCCCCCCCCCCCCCC)c2cccc(C(=O)O[H])c2)c1
A1951	*C(=O)c1ccc(C(=CCCCCCCCCCCCCCC)c2ccc(C(=O)O[H])cc2)cc1
A1952	*C(=O)CCOP(=S)(Oc1nn2cc(CC)c(C)nc2c1)OCCC(=O)O[H]
A1953	*C(=O)C(CCCCC)CCC(CCCCCCCCCCC)CCC(C(=O)O[H])CCCCC
A1954	*C(=O)C(CCCC)CCCC(CCCCCCCCCCC)CCCC(C(=O)O[H])CCCC
A1955	*C(=O)C(CCC)CCCCC(CCCCCCCCCCC)CCCCC(C(=O)O[H])CCC
A1956	*C(=O)C(CC)CCCCCC(CCCCCCCCCCC)CCCCCC(C(=O)O[H])CC
A1957	*C(=O)C(C)CCCCCCC(CCCCCCCCCCC)CCCCCCC(C(=O)O[H])C
A1958	*C(=O)CCCCCCCCC(CCCCCCCCC(=O)O[H])CCCCCCCCCCC
A1959	*C(=O)CCC(CCC(=O)O[H])CCC(C)C
A1960	*C(=O)C(C)C(CCC(C)C)C(C(=O)O[H])C
A1961	*C(=O)CC(CC(=O)O[H])CCC(CC)CC
A1962	*C(=O)CC(C)C(C(C)C)C(C)CC(=O)O[H]
A1963	*C(=O)CC(CC(=O)O[H])C(C(C)C)C(C)C
A1964	*C(=O)C(C)(C)C(C(C)C)C(C(=O)O[H])(C)C
A1965	*C(=O)CC(CC(=O)O[H])(CCC)C(C)(C)C
A1966	*C(=O)CC(C)(CC(=O)O[H])C(C)(C)CCC
A1967	*C(=O)c1ccc(C(=O)C(=O)c2ccc(C(=O)O[H])cc2)cc1
A1968	*C(=O)c1ccccc1C(=O)C(=O)c1ccccc1C(=O)O[H]
A1969	*C(=O)c1cccc(C(=O)C(=O)c2cccc(C(=O)O[H])c2)c1
A1970	*C(=O)c1cc(C(=O)O[H])c(OC)cc1OC
A1971	*C(=O)COc1cccc(OCC(=O)O[H])c1
A1972	*C(=O)CC(=O)CCCC(=O)CC(=O)O[H]
A1973	*C(=O)C(C(=O)C)CC(C(=O)O[H])C(=O)C
A1974	*C(=O)C(OC(OC(C(=O)O[H])C)c1occc1)C
A1975	*C(=O)CCOC(OCCC(=O)O[H])c1occc1
A1976	*C(=O)CC1(CC(=O)O[H])Cc2ccccc2CC1
A1977	*C(=O)C=CCCCCCCCCCCCCCCC=CC(=O)O[H]
A1978	*C(=O)C(=C)CCCCCCCCCCCCCCC(C(=O)O[H])=C
A1979	*C(=O)C(C=C)CCCCCCCCCCCCC(C(=O)O[H])C=C
A1980	*C(=O)C(CC=C)CCCCCCCCCCC(C(=O)O[H])CC=C
A1981	*C(=O)C(CCC=C)CCCCCCCCC(C(=O)O[H])CCC=C
A1982	*C(=O)C(CCCC=C)CCCCCCC(C(=O)O[H])CCCC=C
A1983	*C(=O)CN1C(=O)N(CC(=O)O[H])C(=O)C(C)(C)C1=O
A1984	*C(=O)CC1(CC(=O)O[H])C(=O)N(C)C(=O)N(C)C1=O
A1985	*C(=O)C(OP(=S)(Oc1nc2ccccc2nc1)OC(C(=O)O[H])C)C
A1986	*C(=O)CCOP(=S)(Oc1nc2ccccc2nc1)OCCC(=O)O[H]
A1987	*C(=O)c1ccc2cc3cc4cc5cc(C(=O)O[H])ccc5cc4cc3cc2c1
A1988	*C(=O)c1ccc2cc3cc4cc5ccc(C(=O)O[H])cc5cc4cc3cc2c1
A1989	*C(=O)c1cccc2cc3cc4cc5c(C(=O)O[H])cccc5cc4cc3cc12
A1990	*C(=O)c1cccc2cc3cc4cc5cccc(C(=O)O[H])c5cc4cc3cc12
A1991	*C(=O)c1c2ccccc2cc2cc3cc4ccccc4c(C(=O)O[H])c3cc12
A1992	*C(=O)c1c2ccccc2cc2cc3c(C(=O)O[H])c4ccccc4cc3cc12
A1993	*C(=O)c1cc(C)cc2c1Sc1cc(C)cc(C(=O)O[H])c1S2
A1994	*C(=O)c1cc2c(cc1C)Sc1cc(C(=O)O[H])c(C)cc1S2
A1995	*C(=O)Cc1ccc2c(c1)Sc1ccc(CC(=O)O[H])cc1S2
A1996	*C(=O)c1c2c(ccc1C)Sc1c(ccc(C)c1C(=O)O[H])S2
A1997	*C(=O)c1ccc2c(c1)Oc1cc(C(=O)O[H])ccc1N2
A1998	*C(=O)c1ccc2c(c1)Nc1cc(C(=O)O[H])ccc1O2
A1999	*C(=O)c1cccc2c1Nc1c(cccc1C(=O)O[H])O2
[truncated: 8,615 more rows]

## Sheet: Sheet S2
Name	SMILES
B1	OCC(=CC(=C)C)CO*
B2	OCC(=C=C(C)C)CO*
B3	OCC(n1nncn1)CO*
B4	Oc1ccc(C(NC(c2ccc(O*)cc2)C)C)cc1
B5	Oc1cccc(C(NC(c2cccc(O*)c2)C)C)c1
B6	Oc1ccccc1C(NC(c1ccccc1O*)C)C
B7	OCC(c1ccccc1)NC(c1ccccc1)CO*
B8	Oc1cc(O*)cc(OCC)c1
B9	Oc1cccc(O*)c1OCC
B10	OCCCC1=C(CCCO*)CCCC1
B11	OC(C)CC1=C(CC(O*)C)CCCC1
B12	OC(C1=C(C(O*)CC)CCCC1)CC
B13	OC1C(CCC)=C(CCC)C(O*)CC1
B14	OCC(CO*)C(C)C(C)(C)C(C)(C)C
B15	OCC(C)(CO*)C(C)(C)C(C)C(C)C
B16	OCC(CO*)(C(C)C(C)C)C(C)(C)C
B17	OC1CCCC1O*
B18	OC1CCC(O*)C1
B19	OCCC1(CCO*)CC1
B20	OC1C(=CC)C(O*)CCC1
B21	OC1CC(=CC)CC(O*)C1
B22	OC1CC(O*)C1CCCC
B23	Oc1c(C)oc(C)c(O*)c1=O
B24	OCc1oc(CO*)cc(=O)c1
B25	Oc1cc(O*)c(C)c(OC)c1C
B26	OCc1cccc(CO*)c1OC
B27	OCC(CO*)(CC(=O)C)C(C)(C)CC
B28	OCC(CO*)(CC)C(C)(C)CC(=O)C
B29	OCC(C)(CO*)C(C)(C)C(C)CC
B30	OCC(CO*)(C(C)CC)C(C)(C)C
B31	OC1N(CCCC)C(O*)CC1
B32	OCC(CO*)CCC1CCCC1
B33	OC1CCC(O*)C1CCC(C)C
B34	Oc1cc(O*)c(CC)cc1CC
B35	OC(c1cccc(C(O*)C)c1)C
B36	OCCc1cccc(CCO*)c1
B37	Oc1cccc(O*)c1-c1nocc1
B38	Oc1cc(O*)cc(-c2nocc2)c1
B39	Oc1cccc(O*)c1-c1oncc1
B40	Oc1cc(O*)cc(-c2oncc2)c1
B41	Oc1cc(N(C)C)c2cc(O*)cc(N(C)C)c2c1
B42	Oc1ccc2c(N(C)C)c(O*)ccc2c1N(C)C
B43	OCN(c1cccc2c(N(C)CO*)cccc12)C
B44	Oc1ccc(N(C)C)c2c(O*)ccc(N(C)C)c12
B45	OCC(C)C(C)(C)CC(C)(C)C(C)CO*
B46	OCC(CO*)C(C)(C)CC(C)(C)C(C)C
B47	OC(C)(C)C(C)(C)CC(C)(C)C(O*)(C)C
B48	OCC(C)(CC(C)(CO*)C(C)C)C(C)C
B49	OCC(CO*)(CC(C)(C)C(C)C)C(C)C
B50	Oc1cc(O*)cc(CC(C)(C)C)c1
B51	Oc1cccc(O*)c1CC(C)(C)C
B52	OCC(C)(CO*)Cc1ccccc1
B53	OCC(C)CC(C)(CC(C)C)CC(C)CO*
B54	OCC(CO*)CC(C)(CC(C)C)CC(C)C
B55	OC(C)(C)CC(C)(CC(C)C)CC(O*)(C)C
B56	OC(C(C)C)C(C)(CC(C)C)C(O*)C(C)C
B57	OC(C)CC(CCC)(CCCC)CC(O*)C
B58	OCCCC(CCC)(CCCO*)CCCC
B59	Oc1cccc(O*)c1C1=NN=C1
B60	Oc1cc(O*)cc(C2=NN=C2)c1
B61	OCc1cc(C)cc(CO*)c1C(=O)c1ccc(C)cc1C
B62	OCN1C(=O)N(C)C2N(C)C(=O)N(CO*)C12
B63	OC(C=CC(O*)(C)C)(C)C
B64	OCC(C=CC(C)C)CO*
B65	OCC(C=CC(C)CO*)C
B66	OC(CC=CCC(O*)CCC)CCC
B67	OC(CC)CCC=CCCC(O*)CC
B68	OC(C)CCCC=CCCCC(O*)C
B69	OCCCCCC=CCCCCCO*
B70	Oc1cc(C(=O)C)c(O*)cc1C(=O)C
B71	OCC(=O)c1ccc(C(=O)CO*)cc1
B72	Oc1cc(O*)cc(OC)c1
B73	Oc1cccc(O*)c1OC
B74	Oc1cc(O*)cc(N(C)C)c1
B75	Oc1cccc(O*)c1N(C)C
B76	OCN(c1ccccc1)CO*
B77	Oc1cc(C(C)C)c(O*)cc1C(C)C
B78	OC(c1ccc(C(O*)(C)C)cc1)(C)C
B79	OCC(c1ccc(C(C)CO*)cc1)C
B80	Oc1cccc(O*)c1C=O
B81	Oc1cc(O*)cc(C=O)c1
B82	Oc1cc(N(C)C)c(O*)cc1N(C)C
B83	OCN(c1ccc(N(C)CO*)cc1)C
B84	OCCN(CC)CCO*
B85	OC(N(CC)C(O*)C)C
B86	OCCN(CCO*)CCS
B87	Oc1cncc(O*)c1C=C
B88	Oc1nc(O*)cc(C=C)c1
B89	Oc1cc(C#N)cc(O*)c1
B90	Oc1cccc(O*)c1C#N
B91	Oc1nc(O*)cc(C#N)c1
B92	Oc1cncc(O*)c1C#N
B93	OC1=C(O*)CCCC1
B94	OC1C=CC(O*)CC1
B95	OC1CC=CCC1O*
B96	Oc1cccc(O*)c1CS
B97	Oc1cc(O*)cc(CS)c1
B98	OC1CCCC(O*)C1NC
B99	OC1CC(O*)CC(NC)C1
B100	Oc1ccccc1O*
B101	Oc1cccc(O*)c1
B102	Oc1ccc(O*)cc1
B103	Oc1cc(O*)cc(SC)c1
B104	Oc1cccc(O*)c1SC
B105	OCCC(CCO*)C(C)(C)CC(C)(C)C(C)C
B106	OCC(C)(C)C(CCCCCC)C(C)(C)CO*
B107	OCC(CO*)C1CCCC2CCCCC21
B108	OC1c2c(oc3c2C(O*)CCC3)CCC1
B109	OC1Cc2c(oc3c2CC(O*)CC3)CC1
B110	OCC1(CO*)NCCC(C)C1
B111	Oc1cccc(N(C(=O)NCC=C)c2cccc(O*)c2)c1
B112	Oc1ccc(N(C(=O)NCC=C)c2ccc(O*)cc2)cc1
B113	Oc1ccccc1N(C(=O)NCC=C)c1ccccc1O*
B114	OCC(c1ccccc1C(C)(C)C)(C)CO*
B115	Oc1ccc(O*)c(C(C)(C)C)c1C(C)(C)C
B116	OCC(c1ccccc1C(C)(C)CO*)(C)C
B117	OCC(OC)CC(OC)CO*
B118	Oc1cc2c(c3c(O*)cccc13)CCCC2
B119	OC(C)(C)CC(CC(O*)(C)C)C(CC)CCCC
B120	OCC(C)CC(CC(C)CO*)C(CC)CCCC
B121	OCCC(CCO*)CCCCCCCCCCC
B122	OCC(CO*)C(C)CC
B123	OCCCCC(CC)CCC(CC)CCCCO*
B124	OC(C)CCC(CC)CCC(CC)CCC(O*)C
B125	OC(CC)CC(CC)CCC(CC)CC(O*)CC
B126	OC(CCC)C(CC)CCC(CC)C(O*)CCC
B127	OC(C)C(CCCC)CCC(CCCC)C(O*)C
B128	OCCC(CCCC)CCC(CCO*)CCCC
B129	Oc1cc(C(C)CC)c(O*)cc1C(C)CC
B130	OC(c1ccc(C(O*)(C)CC)cc1)(C)CC
B131	OCC(c1ccc(C(CO*)CC)cc1)CC
B132	OC(C)C(c1ccc(C(C)C(O*)C)cc1)C
B133	OCCC(c1ccc(C(C)CCO*)cc1)C
B134	OCC(c1cccc(C(C)(C)C)c1)(C)CO*
B135	Oc1cc(O*)c(C(C)(C)C)cc1C(C)(C)C
B136	OCC(c1cccc(C(C)(C)CO*)c1)(C)C
B137	ON(c1nc(SC)nc(N(O*)CC)n1)CC
B138	OC(Nc1nc(SC)nc(NC(O*)C)n1)C
B139	OCCNc1nc(SC)nc(NCCO*)n1
B140	Oc1c(C)c(O*)c(C)c(C)c1C
B141	OCc1cc(C)cc(CO*)c1C
B142	OC1CCCC(C(CC(C)C)C2CCCC(O*)C2)C1
B143	OC1CCCCC1C(CC(C)C)C1CCCCC1O*
B144	OC1CCC(C(CC(C)C)C2CCC(O*)CC2)CC1
B145	Oc1cc(C(=O)c2ccc(OCC)c(O*)c2)ccc1OCC
B146	OC(Oc1ccc(C(=O)c2ccc(OC(O*)C)cc2)cc1)C
B147	OCCOc1ccc(C(=O)c2ccc(OCCO*)cc2)cc1
B148	OCCOC(C#C)OCCO*
B149	Oc1ccc(O*)c(C)c1C
B150	OCc1ccccc1CO*
B151	Oc1ccc2c(c1)-c1cc(O*)ccc1S2(=O)=O
B152	Oc1ccc2c(c1)S(=O)(=O)c1cc(O*)ccc1-2
B153	Oc1cccc2c1S(=O)(=O)c1c(O*)cccc1-2
B154	Oc1cccc2c1-c1c(O*)cccc1S2(=O)=O
B155	OC(C)CCC(CCc1ccccc1)CCC(O*)C
B156	OCCCCC(CCc1ccccc1)CCCCO*
B157	OC(CC)CC(CCc1ccccc1)CC(O*)CC
B158	ON(c1nc(NC)nc(N(O*)C)n1)C
B159	OCNc1nc(NC)nc(NCO*)n1
B160	OC1CCC(O*)CC(S(=O)c2ccccc2)C1
B161	OC1CCC(O*)CC(Sc2ccccc2)C1
B162	OCCC(C1CCCCC1)C(CCO*)C1CCCCC1
B163	OC(C)C(C1CCCCC1)C(C(O*)C)C1CCCCC1
B164	OC1(C(CC)C(CC)C2(O*)CCCCC2)CCCCC1
B165	OC1CCC(C(CC)C(CC)C2CCC(O*)CC2)CC1
B166	Oc1cccc(NC(=Nc2ccccc2)Nc2cccc(O*)c2)c1
B167	Oc1ccc(NC(=Nc2ccccc2)Nc2ccc(O*)cc2)cc1
B168	Oc1ccccc1NC(=Nc1ccccc1)Nc1ccccc1O*
B169	Oc1ccc(OP(Oc2ccccc2)Oc2ccc(O*)cc2)cc1
B170	Oc1cccc(OP(Oc2ccccc2)Oc2cccc(O*)c2)c1
B171	Oc1ccccc1OP(Oc1ccccc1)Oc1ccccc1O*
B172	Oc1ccc(Nc2ccc(O*)cc2)cc1
B173	Oc1cccc(Nc2cccc(O*)c2)c1
B174	Oc1ccccc1Nc1ccccc1O*
B175	Oc1ccc(NC(=O)Nc2ccc(O*)cc2)cc1
B176	Oc1ccccc1NC(=O)Nc1ccccc1O*
B177	Oc1cccc(NC(=O)Nc2cccc(O*)c2)c1
B178	Oc1cc(O*)cc(NC(C)C)c1
B179	Oc1cccc(O*)c1NC(C)C
B180	OCC(Nc1ccccc1)CO*
B181	OC=CCOc1nc(OCC=CO*)nc(CC=C)n1
B182	OC(=C)COc1nc(OCC(O*)=C)nc(CC=C)n1
B183	OC1=CC(=O)C=C(O*)C1=N
B184	OC1=CC(=N)C=C(O*)C1=O
B185	OCOC(OCO*)Cc1ccccc1
B186	Oc1ccc(Oc2ccc(O*)cc2)cc1
B187	Oc1cccc(Oc2cccc(O*)c2)c1
B188	Oc1ccccc1Oc1ccccc1O*
B189	Oc1cc(Cc2ccc(N(C)C)c(O*)c2)ccc1N(C)C
B190	OCN(c1ccc(Cc2ccc(N(C)CO*)cc2)cc1)C
B191	Oc1cc(N(C)C)ccc1Cc1ccc(N(C)C)cc1O*
B192	Oc1cc(Cc2ccc(N=C=O)c(O*)c2)ccc1N=C=O
B193	Oc1cc(Nc2ccc(OC)c(O*)c2)ccc1OC
B194	OCOc1ccc(Nc2ccc(OCO*)cc2)cc1
B195	Oc1cc(OC)ccc1Nc1ccc(OC)cc1O*
B196	Oc1ccc(Cc2ccc(O*)cc2)cc1
B197	Oc1cccc(Cc2cccc(O*)c2)c1
B198	Oc1ccccc1Cc1ccccc1O*
B199	Oc1cc(O*)cc(NCC)c1
B200	Oc1cccc(O*)c1NCC
B201	OCCCC(CCCO*)C(C)(C)C
B202	OCC(C)(CO*)C(CCC)CCC
B203	OC(C)CC(CC(O*)C)C(C)(C)C
B204	OC(CC)C(C(O*)CC)C(C)(C)C
B205	OCCCCCCCCCCCCO*
B206	OC(C)CCCCCCCCC(O*)C
B207	OC(CC)CCCCCCC(O*)CC
B208	OC(CCC)CCCCC(O*)CCC
B209	OCCCCCCC(CCC)C(CCC)CCCCCCO*
B210	OCCCC(CCCCCC)C(CCCO*)CCCCCC
B211	OC(C)CCCCC(CCC)C(CCC)CCCCC(O*)C
B212	OC(CC)CCCC(CCC)C(CCC)CCCC(O*)CC
B213	OC(CCC)CCC(CCC)C(CCC)CCC(O*)CCC
B214	OC(CCCC)CC(CCC)C(CCC)CC(O*)CCCC
B215	OC(C)CC(CCCCCC)C(CCCCCC)CC(O*)C
B216	OCCCCCCCC#CCCCCCCCO*
B217	OC(C)CCCCCC#CCCCCCC(O*)C
B218	OC(CC)CCCCC#CCCCCC(O*)CC
B219	OC(CCC)CCCC#CCCCC(O*)CCC
B220	OC(CCC#CCCC(O*)CCCC)CCCC
B221	OC(CC#CCC(O*)CCCCC)CCCCC
B222	OCC(C)(CO*)C1CCCCCCC1
B223	OC1CCCCCC(O*)C1C(C)(C)C
B224	OC1CCCC(O*)CC(C(C)(C)C)C1
B225	OC1CCC(C(C)(C)C)CCC(O*)C1
B226	OC1CCN(SSN2CCC(O*)CC2)CC1
B227	OCC(c1cc(C)c(C)cc1C)CO*
B228	OCC1(CO*)CCC1
B229	OC1CC(O*)C1(C)C
B230	OC1CCCCC1C(C(C)CCCCCC)C1CCCCC1O*
B231	OC1CCC(C(C(C)CCCCCC)C2CCC(O*)CC2)CC1
B232	Oc1ccccc1C(C=C)(c1ccccc1O*)CCCCC
B233	Oc1cccc(C(C=C)(c2cccc(O*)c2)CCCCC)c1
B234	Oc1ccc(C(C=C)(c2ccc(O*)cc2)CCCCC)cc1
B235	OC=CCn1c(=O)n(CC=C)c(=O)n(CC=CO*)c1=O
B236	OC(=C)Cn1c(=O)n(CC=C)c(=O)n(CC(O*)=C)c1=O
B237	ON(C(=O)CCCCC(=O)N(O*)CCC)CCC
B238	OC(NC(=O)CCCCC(=O)NC(O*)CC)CC
B239	OC(C)CNC(=O)CCCCC(=O)NCC(O*)C
B240	OCCCNC(=O)CCCCC(=O)NCCCO*
B241	OCc1cccc(CO*)c1-c1ccccc1C
B242	OCC1(CO*)C(C)CCC1CCC
B243	OCC(C=C(C)CC)(C)CO*
B244	OCC(=CC(C)(C)CC)CO*
B245	OCC(C=C(C)C)(CO*)CC
B246	OC1CCCC1CCCSCCCCCCSCCCC1CCCC1O*
B247	OC(SCCCCCCSC(O*)CCC1CCCC1)CCC1CCCC1
B248	OC(CSCCCCCCSCC(O*)CC1CCCC1)CC1CCCC1
B249	OC(CCSCCCCCCSCCC(O*)C1CCCC1)C1CCCC1
B250	OC1(CCCSCCCCCCSCCCC2(O*)CCCC2)CCCC1
B251	OC1CCC(CCCSCCCCCCSCCCC2CCC(O*)C2)C1
B252	OCC(C)CC(CCCCC(CC(C)C)CC(C)CO*)CC(C)C
B253	OCC(C)CC(CCCCC(CC(C)C)CC(C)C)CC(C)CO*
B254	OC(C(C)C)C(CCCCC(CC(C)C)C(O*)C(C)C)CC(C)C
B255	OC(C)(C)CC(CCCCC(CC(C)C)CC(C)C)CC(O*)(C)C
B256	OC(C)(C)CC(CCCCC(CC(C)C)CC(O*)(C)C)CC(C)C
B257	OC(CCCCC(O*)(CC(C)C)CC(C)C)(CC(C)C)CC(C)C
B258	OCCCCC(CC)CCCCCCCCC(CC)CCCCO*
B259	OC(C)CCC(CC)CCCCCCCCC(CC)CCC(O*)C
B260	OC(CC)CC(CC)CCCCCCCCC(CC)CC(O*)CC
B261	OC(CCC)C(CC)CCCCCCCCC(CC)C(O*)CCC
B262	OC(CC)(CCCC)CCCCCCCCC(O*)(CC)CCCC
B263	OC(C)C(CCCC)CCCCCCCCC(CCCC)C(O*)C
B264	OCCC(CCCC)CCCCCCCCC(CCO*)CCCC
B265	OC(CCCCCCC(O*)C(CC)CCCC)C(CC)CCCC
B266	Oc1ccccc1CC(C=C)(c1ccccc1)Cc1ccccc1O*
B267	Oc1cccc(CC(C=C)(c2ccccc2)Cc2cccc(O*)c2)c1
B268	Oc1ccc(CC(C=C)(c2ccccc2)Cc2ccc(O*)cc2)cc1
B269	OCCCCCCCCCCCCCO*
B270	OC(C)CCCCCCCCCC(O*)C
B271	OC(CC)CCCCCCCC(O*)CC
B272	OC(CCC)CCCCCC(O*)CCC
B273	OC(CCCC)CCCC(O*)CCCC
B274	OCC(CO*)(CC=C)CC(C)C
B275	OCC(CO*)CC(C)(C)CC=C
B276	OCC(CO*)CC(C)CC(=C)C
B277	OCC(C)(C)CC(c1ccc(C(C)(C)CC(C)(C)CO*)cc1)(C)C
B278	OCC(c1ccc(C(C)(CO*)CC(C)(C)C)cc1)(C)CC(C)(C)C
B279	OC(C(c1ccc(C(C)(C)C(O*)C(C)(C)C)cc1)(C)C)C(C)(C)C
B280	OC(=C(CC)CCCC)CCCCCCC(O*)=C(CC)CCCC
B281	OC(C(=CCCCCCCC=C(CCCC)C(O*)C)CCCC)C
B282	OCCC(=CCCCCCCC=C(CCO*)CCCC)CCCC
B283	OC(C(=CCCCCCCC=C(CC)C(O*)CCC)CC)CCC
B284	OC(CC(=CCCCCCCC=C(CC)CC(O*)CC)CC)CC
B285	OC(C)CCC(=CCCCCCCC=C(CC)CCC(O*)C)CC
B286	OCCCCC(=CCCCCCCC=C(CC)CCCCO*)CC
B287	OCCC(CCO*)CCCCC#C
B288	Oc1ccc(CC(=O)Cc2ccc(O*)cc2)cc1
B289	Oc1ccccc1CC(=O)Cc1ccccc1O*
B290	Oc1cccc(CC(=O)Cc2cccc(O*)c2)c1
B291	Oc1ccccc1NC(=N)Nc1ccccc1O*
B292	Oc1cccc(NC(=N)Nc2cccc(O*)c2)c1
B293	Oc1ccc(NC(=N)Nc2ccc(O*)cc2)cc1
B294	Oc1ccc(NC(=S)Nc2ccc(O*)cc2)cc1
B295	Oc1ccccc1NC(=S)Nc1ccccc1O*
B296	Oc1cccc(NC(=S)Nc2cccc(O*)c2)c1
B297	Oc1ccc(CCCc2ccc(O*)cc2)cc1
B298	Oc1cccc(CCCc2cccc(O*)c2)c1
B299	Oc1ccccc1CCCc1ccccc1O*
B300	Oc1c(CC)cc(CC)c(O*)c1CC
B301	OC(c1cc(CC)cc(C(O*)C)c1)C
B302	OCCc1cc(CC)cc(CCO*)c1
B303	Oc1cc(O*)cc(NC(=O)C)c1
B304	Oc1cccc(O*)c1NC(=O)C
B305	Oc1cc(N=C=O)cc(O*)c1
B306	Oc1cccc(O*)c1N=C=O
B307	OC1CCC(O*)C1CC(NC)C
B308	OC(N(CN(CC)C(O*)C)CC)C
B309	OC(N(CN(CC)CC)C(O*)C)C
B310	OCCN(CN(CC)CCO*)CC
B311	OCCN(CN(CC)CC)CCO*
B312	Oc1cc(OC)c(O*)cc1OC
B313	OCOc1ccc(OCO*)cc1
B314	OCCCN(CCC)CCCO*
B315	OC(C)CN(CCC)CC(O*)C
B316	OC(N(CCC)C(O*)CC)CC
B317	OC=CCN(CC=C)CC=CO*
B318	OC(=C)CN(CC=C)CC(O*)=C
B319	OCCN(CCO*)CCCC
B320	OC(N(CCCC)C(O*)C)C
B321	OC(CN(CC)CC(O*)CC)CC
B322	OC(C)CCN(CC)CCC(O*)C
B323	OCCCCN(CC)CCCCO*
B324	OCCCCN(CCCC)CCCCO*
B325	OC(C)CCN(CCCC)CCC(O*)C
B326	OC(CN(CCCC)CC(O*)CC)CC
B327	OC(CN(CCC)CC(O*)CC)CC
B328	OC(C)CCN(CCC)CCC(O*)C
B329	OCCCCN(CCC)CCCCO*
B330	OCCCCOP(OCCCCO*)CCCC
B331	OCCCCCCN(CCCCCC)CCCCCCO*
B332	OC(CCN(CCCCCC)CCC(O*)CCC)CCC
B333	OC(CC)CCCN(CCCCCC)CCCC(O*)CC
B334	OC(C)CCCCN(CCCCCC)CCCCC(O*)C
B335	OC(CN(CCCCCC)CC(O*)CCCC)CCCC
B336	Oc1cccc(O*)c1C=C
B337	Oc1cc(O*)cc(C=C)c1
B338	OCCCCCCCC1CCC(C2CCC(CCCCCCCO*)CC2)CC1
B339	OC(C)CCCCCC1CCC(C2CCC(CCCCCC(O*)C)CC2)CC1
B340	OC(CC)CCCCC1CCC(C2CCC(CCCCC(O*)CC)CC2)CC1
B341	OC(CCC)CCCC1CCC(C2CCC(CCCC(O*)CCC)CC2)CC1
B342	OC(CCCC)CCC1CCC(C2CCC(CCC(O*)CCCC)CC2)CC1
B343	OC(CCCCC)CC1CCC(C2CCC(CC(O*)CCCCC)CC2)CC1
B344	OC(CCCCCC)C1CCC(C2CCC(C(O*)CCCCCC)CC2)CC1
B345	OC1(CCCCCCC)CCC(C2CCC(O*)(CCCCCCC)CC2)CC1
B346	OC=CCCCCCCCCCCCCCCCCCCCCCCC=CO*
B347	OC(=C)CCCCCCCCCCCCCCCCCCCCCCC(O*)=C
B348	OC(C=C)CCCCCCCCCCCCCCCCCCCCC(O*)C=C
B349	OC(CC=C)CCCCCCCCCCCCCCCCCCC(O*)CC=C
B350	OC(CCC=C)CCCCCCCCCCCCCCCCC(O*)CCC=C
B351	OC(CCCC=C)CCCCCCCCCCCCCCC(O*)CCCC=C
B352	OC(CCCCC=C)CCCCCCCCCCCCC(O*)CCCCC=C
B353	OC(CCCCCC=C)CCCCCCCCCCC(O*)CCCCCC=C
B354	OC(CCCCCCC=C)CCCCCCCCC(O*)CCCCCCC=C
B355	OC1CCCCC1C(c1ccccc1)(CCCCCCC)C1CCCCC1O*
B356	OC1CCCC(C(c2ccccc2)(CCCCCCC)C2CCCC(O*)C2)C1
B357	OC1CCC(C(c2ccccc2)(CCCCCCC)C2CCC(O*)CC2)CC1
B358	OCCOP(=S)(OCCO*)SC(N1C(=O)c2ccccc2C1=O)C
B359	OCC(CO*)CN1CCCCC1
B360	OC1N(CC(C)C)C(O*)CCC1
B361	OC1CN(CC(C)C)CC(O*)C1
B362	OC(CCCCCC)CCC(CCCCCCCCCC)CCC(O*)CCCCCC
B363	OC(CCCCC)CCCC(CCCCCCCCCC)CCCC(O*)CCCCC
B364	OC(CCCC)CCCCC(CCCCCCCCCC)CCCCC(O*)CCCC
B365	OC(CCC)CCCCCC(CCCCCCCCCC)CCCCCC(O*)CCC
B366	OC(CC)CCCCCCC(CCCCCCCCCC)CCCCCCC(O*)CC
B367	OC(C)CCCCCCCC(CCCCCCCCCC)CCCCCCCC(O*)C
B368	OCCCCCCCCCC(CCCCCCCCCO*)CCCCCCCCCC
B369	OCC1C(C)c2ccccc2C(C)C1CO*
B370	Oc1ccc(O*)c2c1C(C)C(C)C(C)C2C
B371	OC1(C)c2ccccc2C(O*)(C)C(C)C1C
B372	OCC1c2ccccc2C(CO*)C(C)C1C
B373	OCCCCC(CC)CCCCCCCCCCC(CC)CCCCO*
B374	OC(C)CCC(CC)CCCCCCCCCCC(CC)CCC(O*)C
B375	OC(CC)CC(CC)CCCCCCCCCCC(CC)CC(O*)CC
B376	OC(CCC)C(CC)CCCCCCCCCCC(CC)C(O*)CCC
B377	OC(CC)(CCCC)CCCCCCCCCCC(O*)(CC)CCCC
B378	OC(C)C(CCCC)CCCCCCCCCCC(CCCC)C(O*)C
B379	OCCC(CCCC)CCCCCCCCCCC(CCO*)CCCC
B380	OC(CCCCCCCCC(O*)C(CC)CCCC)C(CC)CCCC
B381	OC(CCCCCCC(O*)CC(CC)CCCC)CC(CC)CCCC
B382	OCC(C)CC(CCCCCCCCCCCCCCC)CC(C)CO*
B383	OCCC1=C(CCO*)CCCC1
B384	OC(C1=C(C(O*)C)CCCC1)C
B385	OC(CCCCC)CCCC(CCCCCCCCCCC)CCCC(O*)CCCCC
B386	OC(CCCC)CCCCC(CCCCCCCCCCC)CCCCC(O*)CCCC
B387	OC(CCC)CCCCCC(CCCCCCCCCCC)CCCCCC(O*)CCC
B388	OC(CC)CCCCCCC(CCCCCCCCCCC)CCCCCCC(O*)CC
B389	OC(C)CCCCCCCC(CCCCCCCCCCC)CCCCCCCC(O*)C
B390	OCCCCCCCCCC(CCCCCCCCCO*)CCCCCCCCCCC
B391	OCCCCCCC(CCCC)CCCCCCCCC(CCCC)CCCCCCO*
B392	OC(C)CCC(CCCCCC)CCCCCCCCC(CCCCCC)CCC(O*)C
B393	OCCCCC(CCCCCC)CCCCCCCCC(CCCCO*)CCCCCC
B394	OC(CCCCCCC(O*)C(CCCC)CCCCCC)C(CCCC)CCCCCC
B395	OC(C)CCCCC(CCCC)CCCCCCCCC(CCCC)CCCCC(O*)C
B396	OC(CC)CCCC(CCCC)CCCCCCCCC(CCCC)CCCC(O*)CC
B397	OC(CCC)CCC(CCCC)CCCCCCCCC(CCCC)CCC(O*)CCC
B398	OC(CCCC)CC(CCCC)CCCCCCCCC(CCCC)CC(O*)CCCC
B399	OC(CCCCC)C(CCCC)CCCCCCCCC(CCCC)C(O*)CCCCC
B400	OC(CCCC)(CCCCCC)CCCCCCCCC(O*)(CCCC)CCCCCC
B401	OC(CCC)C(CCCCCC)CCCCCCCCC(CCCCCC)C(O*)CCC
B402	OC(CC)CC(CCCCCC)CCCCCCCCC(CCCCCC)CC(O*)CC
B403	OC(N(C)C(O*)(C)C)(C)C
B404	OCC(N(C)C(C)C)CO*
B405	OCC(N(C)C(C)CO*)C
B406	Oc1cccc(O*)c1-c1nonc1
B407	Oc1cc(O*)cc(-c2nonc2)c1
B408	Oc1ccc(C(=O)c2nonc2C(=O)c2ccc(O*)cc2)cc1
B409	Oc1ccccc1C(=O)c1nonc1C(=O)c1ccccc1O*
B410	Oc1cccc(C(=O)c2nonc2C(=O)c2cccc(O*)c2)c1
B411	OCC(CO*)CCCC
B412	Oc1cccc2c1C=Cc1c(O*)cccc1C2
B413	Oc1ccc2c(c1)C=Cc1cc(O*)ccc1C2
B414	Oc1ccc2c(c1)Cc1cc(O*)ccc1C=C2
B415	Oc1cccc2c1Cc1c(O*)cccc1C=C2
B416	OC(CC=CCC(O*)CCCC)CCCC
B417	OC(CCC=CCCC(O*)CCC)CCC
B418	OC(CC)CCCC=CCCCC(O*)CC
B419	OC(C)CCCCC=CCCCCC(O*)C
B420	OCCCCCCC=CCCCCCCO*
B421	OCCCCCCCCCCCCCCCCCCCCO*
B422	OC(C)CCCCCCCCCCCCCCCCC(O*)C
B423	OC(CC)CCCCCCCCCCCCCCC(O*)CC
B424	OC(CCC)CCCCCCCCCCCCC(O*)CCC
B425	OC(CCCC)CCCCCCCCCCC(O*)CCCC
B426	OC(CCCCC)CCCCCCCCC(O*)CCCCC
B427	OC(CCCCCC)CCCCCCC(O*)CCCCCC
B428	OC1CCC(O*)C12CCCCC2
B429	Oc1ccc(-c2cccc3cccc(-c4ccc(O*)cc4)c23)cc1
B430	Oc1ccccc1-c1cccc2cccc(-c3ccccc3O*)c12
B431	Oc1cccc(-c2cccc3cccc(-c4cccc(O*)c4)c23)c1
B432	Oc1ccc2ccc(O*)c(-c3ccccc3)c2c1-c1ccccc1
B433	Oc1cc(-c2ccccc2)c2c(-c3ccccc3)cc(O*)cc2c1
B434	Oc1cc(C)ccc1P(c1ccc(C)cc1)c1ccc(C)cc1O*
B435	Oc1cc(P(c2ccc(C)cc2)c2ccc(C)c(O*)c2)ccc1C
B436	OCc1ccc(P(c2ccc(C)cc2)c2ccc(CO*)cc2)cc1
B437	OCCCCCCCCCCCCCCCCCCCO*
B438	OC(C)CCCCCCCCCCCCCCCC(O*)C
B439	OC(CC)CCCCCCCCCCCCCC(O*)CC
B440	OC(CCC)CCCCCCCCCCCC(O*)CCC
B441	OC(CCCC)CCCCCCCCCC(O*)CCCC
B442	OC(CCCCC)CCCCCCCC(O*)CCCCC
B443	OC(CCCCCC)CCCCCC(O*)CCCCCC
B444	OCC(=C(C)CC(C)(C)CC)CO*
B445	OCC(CO*)(CC(=C(C)C)C)CC
B446	OCC(CO*)CC(C=C(C)C)(C)C
B447	OCC(=CC(C)(C)CC(C)C)CO*
B448	OCC(C=C(C)C)(CO*)CC(C)C
B449	OCCC(C=C(C)CC)(C)CCO*
B450	OCC(CO*)C(C)(CC(=C)C)CC
B451	OCCC(CCO*)C(C(=C)C)C
B452	OCCCCC(CC)CCCCO*
B453	OC(C)CCC(CC)CCC(O*)C
B454	OC(CC)CC(CC)CC(O*)CC
B455	OC(C)C(CCCC)C(O*)C
B456	OCCC(CCO*)CCCC
B457	Oc1cc(C)ccc1SSc1ccc(C)cc1O*
B458	Oc1cc(SSc2ccc(C)c(O*)c2)ccc1C
B459	OCc1ccc(SSc2ccc(CO*)cc2)cc1
B460	OCCCCC(CC)CCCCCCCCCC(CC)CCCCO*
B461	OC(C)CCC(CC)CCCCCCCCCC(CC)CCC(O*)C
B462	OC(CC)CC(CC)CCCCCCCCCC(CC)CC(O*)CC
B463	OC(CCC)C(CC)CCCCCCCCCC(CC)C(O*)CCC
B464	OC(CC)(CCCC)CCCCCCCCCC(O*)(CC)CCCC
B465	OC(C)C(CCCC)CCCCCCCCCC(CCCC)C(O*)C
B466	OCCC(CCCC)CCCCCCCCCC(CCO*)CCCC
B467	OC(CCCCCCCC(O*)C(CC)CCCC)C(CC)CCCC
B468	OC(CCCCCC(O*)CC(CC)CCCC)CC(CC)CCCC
B469	Oc1cc(O*)cc(CC(C)C)c1
B470	Oc1cccc(O*)c1CC(C)C
B471	OCC(CO*)Cc1ccccc1
B472	Oc1ccc(CNCc2ccc(O*)cc2)cc1
B473	Oc1cccc(CNCc2cccc(O*)c2)c1
B474	Oc1ccccc1CNCc1ccccc1O*
B475	Oc1cc(O*)cc(CNC)c1
B476	Oc1cccc(O*)c1CNC
B477	Oc1cc(N=C=S)cc(O*)c1
B478	Oc1cccc(O*)c1N=C=S
B479	OC1CCCC(O*)C1CC(=O)C
B480	OC1CC(O*)CC(CC(=O)C)C1
B481	Oc1cc(O*)cc(C)c1
B482	Oc1cccc(O*)c1C
B483	Oc1cc(O*)cc(CN(C)C)c1
B484	Oc1cccc(O*)c1CN(C)C
B485	OCN(CO*)Cc1ccccc1
B486	Oc1cccc(O*)c1NC=S
B487	Oc1cc(O*)cc(NC=S)c1
B488	Oc1ccc(S(=O)(=O)S(=O)(=O)c2ccc(O*)cc2)cc1
B489	Oc1ccccc1S(=O)(=O)S(=O)(=O)c1ccccc1O*
B490	Oc1cccc(S(=O)(=O)S(=O)(=O)c2cccc(O*)c2)c1
B491	OCC(=C(C(C)C)C(C)C)CO*
B492	OC(C(=C(C)C)C(O*)(C)C)(C)C
B493	OCC(C(=C(C)C)C(C)C)CO*
B494	OCCCCCC#CCC#CCC#CCC#CCCCCCO*
B495	OCC(C(=C(C)C)c1ccccc1)CO*
B496	Oc1cc(O*)cc(C(=C(C)C)C(C)C)c1
B497	Oc1cccc(O*)c1C(=C(C)C)C(C)C
B498	OCC(=C(c1ccccc1)C(C)C)CO*
B499	Oc1ccc2c(c1)N=c1cc3c(cc1C2=O)=Nc1cc(O*)ccc1C3=O
B500	Oc1ccc2c(c1)C(=O)c1cc3c(cc1=N2)C(=O)c1cc(O*)ccc1N=3
B501	Oc1cccc2c1C(=O)c1cc3c(cc1=N2)C(=O)c1c(cccc1O*)N=3
B502	Oc1cccc2c1N=c1cc3c(cc1C2=O)=Nc1c(O*)cccc1C3=O
B503	Oc1cc(O*)cc(C(=C(C)C)CC)c1
B504	Oc1cccc(O*)c1C(=C(C)C)CC
B505	OCC(=C(c1ccccc1)CC)CO*
B506	Oc1cc(O*)cc(C2CCCC2)c1
B507	Oc1cccc(O*)c1C1CCCC1
B508	OC1CCC(O*)C1c1ccccc1
B509	Oc1ccc(S(c2ccccc2)(c2ccccc2)c2ccc(O*)cc2)cc1
B510	Oc1cccc(S(c2ccccc2)(c2ccccc2)c2cccc(O*)c2)c1
B511	Oc1ccccc1S(c1ccccc1)(c1ccccc1)c1ccccc1O*
B512	OCCC(CCO*)(CCCC)CCC(C)(C)C
B513	OCCC(C=CC(C)(C)C)(CCO*)CCCC
B514	OCC(C)CS(=O)(=O)CC(C)CO*
B515	OCC(CO*)CS(=O)(=O)CC(C)C
B516	OC(C)(C)CS(=O)(=O)CC(O*)(C)C
B517	OC(C(C)C)S(=O)(=O)C(O*)C(C)C
B518	Oc1cc(C)cc(O*)c1OC
B519	Oc1cc(OC)cc(O*)c1C
B520	Oc1cc(C)c(O*)cc1C
B521	Oc1cc(C)cc(O*)c1C
B522	OCc1ccc(CO*)cc1
B523	Oc1cc(S(=O)=O)cc(O*)c1C
B524	Oc1cc(C)cc(O*)c1S(=O)=O
B525	OC(Oc1ccc(OC(O*)CCC)cc1)CCC
B526	OC(COc1ccc(OCC(O*)CC)cc1)CC
B527	OC(C)CCOc1ccc(OCCC(O*)C)cc1
B528	OCCCCOc1ccc(OCCCCO*)cc1
B529	Oc1cc(N=C=O)c(O*)cc1N=C=O
B530	Oc1cc(O*)cc(CC)c1
B531	Oc1cccc(O*)c1CC
B532	Oc1cccc(O*)c1C=CC
B533	Oc1cc(O*)cc(C=CC)c1
B534	OC(=NCCN=C(O*)c1ccccc1)c1ccccc1
B535	Oc1ccc(C=NCCN=Cc2ccc(O*)cc2)cc1
B536	Oc1cccc(C=NCCN=Cc2cccc(O*)c2)c1
B537	Oc1ccccc1C=NCCN=Cc1ccccc1O*
B538	OCCN(CCO*)CCC
B539	OC(N(CCC)C(O*)C)C
B540	OC(N(CCNC)C(O*)C)C
B541	OCCN(CCO*)CCNC
B542	OCC1CCC1CO*
B543	OC1(C)CCC1(O*)C
B544	OC1C(O*)C(C)C1C
B545	Oc1cc(C)cc(O*)c1C#N
B546	Oc1cc(C#N)cc(O*)c1C
B547	OC1CCC(O*)C1CC
B548	OCCC(OOC(C)(C)CCO*)(C)C
B549	OC=CCS(c1ccccc1)(c1ccccc1)CC=CO*
B550	Oc1ccccc1S(c1ccccc1O*)(CC=C)CC=C
B551	OC(=C)CS(c1ccccc1)(c1ccccc1)CC(O*)=C
B552	Oc1cccc(S(c2cccc(O*)c2)(CC=C)CC=C)c1
B553	Oc1ccc(S(c2ccc(O*)cc2)(CC=C)CC=C)cc1
B554	OCCC(CC)(CCO*)C(C)CC
B555	OCC(CO*)(CC)CCC
B556	OCCCCCCCCCC(C)(CCCCCCCCC)CCCCCCCCCO*
B557	OC(CCCCCC)CCC(C)(CCCCCCCCC)CCC(O*)CCCCCC
B558	OC(CCCCC)CCCC(C)(CCCCCCCCC)CCCC(O*)CCCCC
B559	OC(CCCC)CCCCC(C)(CCCCCCCCC)CCCCC(O*)CCCC
B560	OC(CCC)CCCCCC(C)(CCCCCCCCC)CCCCCC(O*)CCC
B561	OC(CC)CCCCCCC(C)(CCCCCCCCC)CCCCCCC(O*)CC
B562	OC(C)CCCCCCCC(C)(CCCCCCCCC)CCCCCCCC(O*)C
B563	Oc1ccc(S(c2ccc(O*)cc2)(C)C)cc1
B564	Oc1cccc(S(c2cccc(O*)c2)(C)C)c1
B565	Oc1ccccc1S(c1ccccc1O*)(C)C
B566	Oc1ccc2c(-c3c4ccccc4cc4cc(O*)ccc34)c3ccccc3cc2c1
B567	Oc1ccc2c(-c3c4ccccc4cc4ccccc34)c3ccc(O*)cc3cc2c1
B568	Oc1cccc2c(-c3c4ccccc4cc4ccccc34)c3cccc(O*)c3cc12
B569	Oc1cccc2c(-c3c4ccccc4cc4c(O*)cccc34)c3ccccc3cc12
B570	Oc1c2ccccc2c(-c2c3ccccc3c(O*)c3ccccc23)c2ccccc12
B571	Oc1ccc2cc3ccccc3c(-c3c4ccccc4cc4ccc(O*)cc34)c2c1
B572	Oc1cccc2cc3ccccc3c(-c3c4ccccc4cc4cccc(O*)c34)c12
B573	Oc1ccc2cc3ccc(O*)cc3c(-c3c4ccccc4cc4ccccc34)c2c1
B574	Oc1cccc2cc3cccc(O*)c3c(-c3c4ccccc4cc4ccccc34)c12
B575	OCC(=C(C)CC)CO*
B576	OCC(C)(CO*)C(C)CC
B577	OCC(C)(CO*)CC(C)CC(C)(C)C
B578	OC(C(C)C(O*)C(C)(C)C)C(C)(C)C
B579	OCC(C)(C)CC(C)CC(C)(C)CO*
B580	OCCCC1CCCCC1CCCO*
B581	OC(C)CC1CCCCC1CC(O*)C
B582	OC(CC)C1CCCCC1C(O*)CC
B583	OC1CCC(O*)C(CCC)C1CCC
B584	OCC(C=C(C(C)C)C(C)(C)C)CO*
B585	OCC(C(=CC(C)C)C(C)(C)C)CO*
B586	OCC(C(=CC(C)C)C(C)C)(C)CO*
B587	OCC1(CO*)C(CC)=C(C)CCC1
B588	Oc1cc(CC)c(O*)cc1CC
B589	OC(c1ccc(C(O*)C)cc1)C
B590	OCCc1ccc(CCO*)cc1
B591	OC=Cc1ccc(C=CO*)cc1
B592	OC(=C)c1ccc(C(O*)=C)cc1
B593	Oc1cc(C=C)c(O*)cc1C=C
B594	OSCc1ccc(CSO*)cc1
B595	OC(S)c1ccc(C(O*)S)cc1
B596	Oc1cc(CS)c(O*)cc1CS
B597	OC(N(CCC(=C)C)C(O*)C)C
B598	OCCN(CCO*)CCC(=C)C
B599	OCC(CO*)CCC
B600	OCCCC(=O)CCCO*
B601	OC(C)CC(=O)CC(O*)C
B602	OC(C(=O)C(O*)CC)CC
B603	ON(C(=S)N(O*)CC)CC
B604	OC(NC(=S)NC(O*)C)C
B605	OCCNC(=S)NCCO*
B606	OC(N(C)C(O*)C)C
B607	OCCN(C)CCO*
B608	Oc1cc(O*)c(C)cc1C
B609	OCc1cccc(CO*)c1
B610	OCCCCCCCCO*
B611	OC(C)CCCCC(O*)C
B612	OC(CC)CCC(O*)CC
B613	OCCCCCCCCCCCCCCCCCCCCCCO*
B614	OC(C)CCCCCCCCCCCCCCCCCCC(O*)C
B615	OC(CC)CCCCCCCCCCCCCCCCC(O*)CC
B616	OC(CCC)CCCCCCCCCCCCCCC(O*)CCC
B617	OC(CCCC)CCCCCCCCCCCCC(O*)CCCC
B618	OC(CCCCC)CCCCCCCCCCC(O*)CCCCC
B619	OC(CCCCCC)CCCCCCCCC(O*)CCCCCC
B620	OC(CCCCCCC)CCCCCCC(O*)CCCCCCC
B621	OC(C=CC(O*)CCC)CCC
B622	OC(CC=CCC(O*)CC)CC
B623	OC(C)CCC=CCCC(O*)C
B624	OCCCCC=CCCCCO*
B625	OCC(C)CCCCCCCCCC(C)CO*
B626	OC(C)(C)CCCCCCCCCC(O*)(C)C
B627	OC(CCCCCCCC(O*)C(C)C)C(C)C
B628	OC(CCCCCC(O*)CC(C)C)CC(C)C
B629	OC(CCCC(O*)CCC(C)C)CCC(C)C
B630	OC(C)COC(OCC(O*)C)C
B631	OCCCOC(OCCCO*)C
B632	OC(C)CN(C)CC(O*)C
B633	OCCCN(C)CCCO*
B634	OSC(=O)CCCCC(=O)SO*
B635	OCC(C#CC)CO*
B636	OCC(CO*)CCC(C)C(C)(C)C
B637	OCC(C)(CO*)C(C)CCC(C)C
B638	OCC(CO*)CC(C)CC(C)(C)C
B639	OCC(C)(CO*)CC(C)CC(C)C
B640	OCC(C)(CO*)CCC(C)(C)CC
B641	OCC(CO*)(CC)CCC(C)(C)C
B642	OCCN(CCO*)C1CCCCC1C
B643	OC(N(C(O*)C)C1CCCCC1C)C
B644	OCCC(C)(CC)CCO*
B645	OC(C)C(C)(CC)C(O*)C
B646	OCCCOS(OCCC)(OCCCO*)C=C
B647	OCCCC(C)(C)CCCO*
B648	OC(C)CC(C)(C)CC(O*)C
B649	OC(CC)C(C)(C)C(O*)CC
B650	OCC(CO*)(CCC)CCC
B651	OC(C)(C)C(CC)C(O*)(C)C
B652	OCC(CO*)C(CC)C(C)C
B653	OCC(C)C(CC)C(C)CO*
B654	OC(C)C(NC(=O)C)C(O*)C
B655	OCCC(NC(=O)C)CCO*
B656	OCC(CO*)CC(C)C(C)C
B657	OCC(CO*)C(C)CC(C)C
B658	OCCCCCCCCCCCCCCCCCCCCCCCCCO*
B659	OC(C)CCCCCCCCCCCCCCCCCCCCCC(O*)C
B660	OC(CC)CCCCCCCCCCCCCCCCCCCC(O*)CC
B661	OC(CCC)CCCCCCCCCCCCCCCCCC(O*)CCC
B662	OC(CCCC)CCCCCCCCCCCCCCCC(O*)CCCC
B663	OC(CCCCC)CCCCCCCCCCCCCC(O*)CCCCC
B664	OC(CCCCCC)CCCCCCCCCCCC(O*)CCCCCC
B665	OC(CCCCCCC)CCCCCCCCCC(O*)CCCCCCC
B666	OC(CCCCCCCC)CCCCCCCC(O*)CCCCCCCC
B667	OCCCCCCCCCCO*
B668	OC(C)CCCCCCC(O*)C
B669	OC(CC)CCCCC(O*)CC
B670	OC(CCC)CCC(O*)CCC
B671	OC(CNCC(O*)(CC)CCCC)(CC)CCCC
B672	OC(C)C(CNCC(CCCC)C(O*)C)CCCC
B673	OCCC(CNCC(CCO*)CCCC)CCCC
B674	OC(CCC)C(CNCC(CC)C(O*)CCC)CC
B675	OC(CC)CC(CNCC(CC)CC(O*)CC)CC
B676	OC(C)CCC(CNCC(CC)CCC(O*)C)CC
B677	OCCCCC(CNCC(CC)CCCCO*)CC
B678	OCC(=CCCC(C)C)CO*
B679	OCC(CO*)CCC=C(C)C
B680	OCC(=CCCC(=C)C)CO*
B681	OCC(CO*)CCCCC
B682	OCCCCCCCCCO*
B683	OC(C)CCCCCC(O*)C
B684	OC(CC)CCCC(O*)CC
B685	Oc1cc(C)cc(O*)c1S
B686	Oc1cc(S)cc(O*)c1C
B687	OC1N(C)C(O*)CCC1
B688	OC1CN(C)CC(O*)C1
B689	Oc1cccc(O*)c1S
B690	Oc1cc(O*)cc(S)c1
B691	OCC1NCC(CO*)NC1
B692	ON1C(=O)CN(O*)C(=O)C1
B693	OCN1CCN(CO*)CC1
B694	OCC(OCCC)CO*
B695	OCC(CO*)CC=C
B696	OCN(CC)CCN(CO*)CC
B697	OC(N(C)CCN(C)C(O*)C)C
B698	OCCN(C)CCN(C)CCO*
B699	OCC(CO*)CC(C)CC
B700	OCCCCCCCO*
B701	OC(C)CCCC(O*)C
B702	OC(CC)CC(O*)CC
B703	OCCCCCCCCCCN(CCCCCCCCCC)CCCCCCCCCCO*
B704	OC(CCCN(CCCCCCCCCC)CCCC(O*)CCCCCC)CCCCCC
B705	OC(CCCCN(CCCCCCCCCC)CCCCC(O*)CCCCC)CCCCC
B706	OC(CCCC)CCCCCN(CCCCCCCCCC)CCCCCC(O*)CCCC
B707	OC(CCC)CCCCCCN(CCCCCCCCCC)CCCCCCC(O*)CCC
B708	OC(CC)CCCCCCCN(CCCCCCCCCC)CCCCCCCC(O*)CC
B709	OC(C)CCCCCCCCN(CCCCCCCCCC)CCCCCCCCC(O*)C
B710	OCCCCCCCCCCCCCCCCCCCCCCCCCCCCCCCO*
B711	OC(CCCCCCCCC)CCCCCCCCCCCC(O*)CCCCCCCCC
B712	OC(CCCCCCCCCC)CCCCCCCCCC(O*)CCCCCCCCCC
B713	OC(C)CCCCCCCCCCCCCCCCCCCCCCCCCCCC(O*)C
B714	OC(CC)CCCCCCCCCCCCCCCCCCCCCCCCCC(O*)CC
B715	OC(CCC)CCCCCCCCCCCCCCCCCCCCCCCC(O*)CCC
B716	OC(CCCC)CCCCCCCCCCCCCCCCCCCCCC(O*)CCCC
B717	OC(CCCCC)CCCCCCCCCCCCCCCCCCCC(O*)CCCCC
B718	OC(CCCCCC)CCCCCCCCCCCCCCCCCC(O*)CCCCCC
B719	OC(CCCCCCC)CCCCCCCCCCCCCCCC(O*)CCCCCCC
B720	OC(CCCCCCCC)CCCCCCCCCCCCCC(O*)CCCCCCCC
B721	OCC(C)(CO*)CC(C)(C)C
B722	OCC(C)(C)CC(C)(C)CO*
B723	OCC(C)(CO*)CCCCC
B724	OCC(C)(C)CCCCC(C)(C)CO*
B725	OC(CCC(O*)C(C)(C)C)C(C)(C)C
B726	OCC(C)(C)CCC(C)(C)CO*
B727	OCC(C)(CO*)CCC(C)(C)C
B728	OC1N(C)C1O*
B729	OC1N(CC)C1O*
B730	OC1CC(O*)C1C=C
B731	OCC(c1ccccc1C)(C)CO*
B732	Oc1ccc(O*)c2c1CCCCC2
B733	OC1c2ccccc2C(O*)CCC1
B734	OC1Cc2ccccc2CC(O*)C1
B735	Oc1c(C)c(C)c(O*)c2c1CCC2
B736	OCc1cc2c(cc1CO*)CCC2
B737	OC1c2cc(C)c(C)cc2C(O*)C1
B738	OCC(c1cccc(C)c1)(C)CO*
B739	Oc1ccc(O*)c2c1C=C2
B740	Oc1c(C)c(C)c(O*)c2c1CCCC2
B741	OCc1cc2c(cc1CO*)CCCC2
B742	OC1c2cc(C)c(C)cc2C(O*)CC1
B743	OCC1(CO*)c2c(C)ccc(C)c2CC1
B744	OCC(C)(C)C1CCCC(C(C)(C)CO*)C1
B745	OCC(C)(CO*)C1CCCC(C(C)(C)C)C1
B746	OC1(C(C)(C)C)CCCC(O*)(C(C)(C)C)C1
B747	Oc1ccc(Pc2ccc(O*)cc2)cc1
B748	Oc1cccc(Pc2cccc(O*)c2)c1
B749	Oc1ccccc1Pc1ccccc1O*
B750	Oc1c2c(c(O*)c3c1CCCC3)CCCC2
B751	OC1c2cc3c(cc2CCC1)CCCC3O*
B752	OC1c2cc3c(cc2CCC1)C(O*)CCC3
B753	OC1c2cc3c(cc2C(O*)CC1)CCCC3
B754	OC1Cc2cc3c(cc2CC1)CC(O*)CC3
B755	OC1Cc2cc3c(cc2CC1)CCC(O*)C3
B756	OCC(C)(CO*)CC(=C)C
B757	OCC(=CC(C)(C)C)CO*
B758	OCC(C=C(C)C)(C)CO*
B759	OCC(CO*)CC(C)(C)C
B760	OCC(C)(CO*)CC(C)C
B761	OCC(SC(C)(C)CO*)(C)C
B762	OCC(SC(C)(C)C)(C)CO*
B763	OCCOP(=O)(OCCO*)OP(=O)(OCC)CC
B764	OCC(CO*)CC(C#C)C
B765	OCC(NC(=O)C=C)(C)CO*
B766	OC1C(O*)CS(=O)(=O)C1
B767	OCC(C)(CO*)CC(=O)C
B768	OCC(CO*)CCCC(C)C
B769	OCC(C)CCCC(C)CO*
B770	OC(C)(C)CCCC(O*)(C)C
B771	OC(CC(O*)C(C)C)C(C)C
B772	OCC(CO*)CC
B773	OCC(=C)CO*
B774	OCNCO*
B775	Oc1sc(-c2sc(-c3sc(O*)cc3)cc2)cc1
B776	Oc1csc(-c2sc(-c3scc(O*)c3)cc2)c1
B777	Oc1c(-c2sc(-c3sccc3O*)cc2)scc1
B778	OC(C)CC(Cc1ccccc1)CC(O*)C
B779	OCCCC(Cc1ccccc1)CCCO*
B780	OCCCC1(CCCO*)CCCCC1
B781	OC(C)CC1(CC(O*)C)CCCCC1
B782	OC(CC)C1(C(O*)CC)CCCCC1
B783	OC1CCCC(O*)C1(CCC)CCC
B784	OC1CC(O*)CC(CCC)(CCC)C1
B785	OC1(c2ccc(C3(O*)CCCCC3)cc2)CCCCC1
B786	OC1CCCCC1c1ccc(C2CCCCC2O*)cc1
B787	OC1CCCC(c2ccc(C3CCCC(O*)C3)cc2)C1
B788	OC1CCC(c2ccc(C3CCC(O*)CC3)cc2)CC1
B789	Oc1ccc(CCCCCCc2ccc(O*)cc2)cc1
B790	Oc1ccccc1CCCCCCc1ccccc1O*
B791	Oc1cccc(CCCCCCc2cccc(O*)c2)c1
B792	OC(c1ccccc1)CCCCC(O*)c1ccccc1
B793	OCN(CO*)CC
B794	OCN(CO*)CCS
B795	OCC(CO*)CC(C)C
B796	OCC(C)CC(C)CO*
B797	OC(C)(C)CC(O*)(C)C
B798	OCC(CO*)CC(=O)C
B799	OCC(C)CO*
B800	OCN(CO*)CCC
B801	OC(NC(O*)(C)C)(C)C
B802	OCC(NC(C)C)CO*
B803	OCC(NC(C)CO*)C
B804	OCC(OC(C)CO*)C
B805	OCC(OC(C)C)CO*
B806	OC(OC(O*)(C)C)(C)C
B807	OC1C(O*)C1C
B808	OC1C(=O)C1O*
B809	Oc1c(C)nc(C)c(O*)c1
B810	OCc1nc(CO*)ccc1
B811	OC1C(=O)C(O*)C1
B812	OC=Cc1cccc(C=CO*)c1
B813	OC(=C)c1cccc(C(O*)=C)c1
B814	Oc1cc(O*)c(C=C)cc1C=C
B815	OCN1CN(C)CN(CO*)C1
B816	Oc1c(C)nc(C)c(O*)c1C
B817	OCc1nc(CO*)cc(C)c1
B818	Oc1ncnc(O*)n1
B819	OCC(C)CC(=O)CC(C)CO*
B820	OCC(CO*)CC(=O)CC(C)C
B821	OC(C)(C)CC(=O)CC(O*)(C)C
B822	OC(C(=O)C(O*)C(C)C)C(C)C
B823	Oc1nc(O*)cc(C)c1
B824	Oc1cncc(O*)c1C
B825	OC1C(=O)C(O*)CCC1
B826	OC1CC(=O)CC(O*)C1
B827	Oc1c2c(c(O*)c3ccccc13)C(=O)c1ccccc1C2=O
B828	Oc1ccc(O*)c2cc3c(cc12)C(=O)c1ccccc1C3=O
B829	Oc1ccc(O*)c2c1C(=O)c1c(cc3ccccc3c1)C2=O
B830	OCOP(=O)(OCO*)CCCCCCCCCCC
B831	Oc1cc(C(c2ccc(C)c(O*)c2)(C)CC)ccc1C
B832	Oc1cc(C)ccc1C(c1ccc(C)cc1O*)(C)CC
B833	OCc1ccc(C(c2ccc(CO*)cc2)(C)CC)cc1
B834	Oc1cccc2c(-c3ccccc3)c3cccc(O*)c3nc12
B835	Oc1cccc2nc3cccc(O*)c3c(-c3ccccc3)c12
B836	Oc1ccc2nc3ccc(O*)cc3c(-c3ccccc3)c2c1
B837	Oc1ccc2c(-c3ccccc3)c3ccc(O*)cc3nc2c1
B838	Oc1cc(C(c2ccc(C)c(O*)c2)(C)C)ccc1C
B839	Oc1cc(C)ccc1C(c1ccc(C)cc1O*)(C)C
B840	OCc1ccc(C(c2ccc(CO*)cc2)(C)C)cc1
B841	Oc1ccc(O*)c2c(CC(C)C)ccc(CC(C)C)c12
B842	OC(c1ccc(C(O*)C(C)C)c2ccccc12)C(C)C
B843	OC(C)(C)Cc1ccc(CC(O*)(C)C)c2ccccc12
B844	OCC(C)Cc1ccc(CC(C)CO*)c2ccccc12
B845	OC1CN(C)CC1O*
B846	Oc1ncnc(O*)c1
B847	OCCCCCCCCCCCCCCCCO*
B848	OC(C)CCCCCCCCCCCCC(O*)C
B849	OC(CC)CCCCCCCCCCC(O*)CC
B850	OC(CCC)CCCCCCCCC(O*)CCC
B851	OC(CCCC)CCCCCCC(O*)CCCC
B852	OC(CCCCC)CCCCC(O*)CCCCC
B853	OC(NC(=S)NC(O*)CCC)CCC
B854	OC(CNC(=S)NCC(O*)CC)CC
B855	OC(C)CCNC(=S)NCCC(O*)C
B856	OCCCCNC(=S)NCCCCO*
B857	OCC(NCC)CO*
B858	OCCCCO*
B859	OC(C)C(O*)C
B860	OCCO*
B861	OC(NC(O*)C)C
B862	OCCNCCO*
B863	OC1=C(O*)CNC1
B864	OC1CCC1O*
B865	OC1CC(O*)C1
B866	OC(CC)CC(COc1ccc(OCC(CC)CC(O*)CC)cc1)CC
B867	OC(C)CCC(COc1ccc(OCC(CC)CCC(O*)C)cc1)CC
B868	OCCCCC(COc1ccc(OCC(CC)CCCCO*)cc1)CC
B869	OC(Oc1ccc(OC(O*)C(CC)CCCC)cc1)C(CC)CCCC
B870	OC(COc1ccc(OCC(O*)(CC)CCCC)cc1)(CC)CCCC
B871	OC(C)C(COc1ccc(OCC(CCCC)C(O*)C)cc1)CCCC
B872	OCCC(COc1ccc(OCC(CCO*)CCCC)cc1)CCCC
B873	OC(CCC)C(COc1ccc(OCC(CC)C(O*)CCC)cc1)CC
B874	OC1CCC(CC(C)(CC(C)C)CC2CCC(O*)CC2)CC1
B875	OC1(CC(C)(CC(C)C)CC2(O*)CCCCC2)CCCCC1
B876	OCC(CO*)CCC(C)C
B877	OCC(C)CCC(C)CO*
B878	OC(C)(C)CCC(O*)(C)C
B879	OCC(OOC(C)(C)C)(C)CO*
B880	OCC(OOC(C)(C)CO*)(C)C
B881	OCC(SSC(C)(C)C)(C)CO*
B882	OCC(SSC(C)(C)CO*)(C)C
B883	OCC(CO*)CCC(=O)C
B884	OCC(=O)CCC(=O)CO*
B885	OCN(CO*)CCN(C)C
B886	OCN(C)CCN(C)CO*
B887	OCCCCCCCCCCCO*
B888	OC(C)CCCCCCCC(O*)C
B889	OC(CC)CCCCCC(O*)CC
B890	OC(CCC)CCCC(O*)CCC
B891	OCC(CO*)CCN=O
B892	OCCCCCO*
B893	OC(C)CC(O*)C
B894	OC(=C(O*)C)C
B895	OCC=CCO*
B896	OCC#CCO*
B897	ON(C)CCN(O*)C
B898	OCNCCNCO*
B899	OCCSCCO*
B900	OCCSSCCO*
B901	ON1CCN(O*)CC1
B902	OC1=C(O*)CCC1
B903	OC1C=CC(O*)C1
B904	OC1CNCC(O*)C1
B905	OCC(=CCCC(=O)C)CO*
B906	OCN(CO*)CCCN(C)C
B907	OCN(C)CCCN(C)CO*
B908	OC(NC(O*)C(C)C)C(C)C
B909	OC(C)(C)CNCC(O*)(C)C
B910	OCC(CO*)CNCC(C)C
B911	OCC(C)CNCC(C)CO*
B912	OC(NC(O*)CC)CC
B913	OC(C)CNCC(O*)C
B914	OCCCNCCCO*
B915	OCCCCCCO*
B916	OC(C)CCC(O*)C
B917	OCCC(C=CC=C)(CC)CCO*
B918	OCC(C(=CC(=C)C)C)(C)CO*
B919	OC(=C)CS(C)(C)CC(O*)=C
B920	OCC(=O)N(C(=O)CO*)C
B921	OCCCC(CC)CCCO*
B922	OC(C)CC(CC)CC(O*)C
B923	OC(CC)C(CC)C(O*)CC
B924	OCCOC(OCCO*)(n1cncc1)C
B925	OCOC(OCO*)(c1ccccc1)n1cncc1
B926	OC(N(C(=O)CC)C(O*)C)C
B927	OCCN(C(=O)CC)CCO*
B928	OCCN(C(=O)CCC)CCO*
B929	OC(N(C(=O)CCC)C(O*)C)C
B930	OC(=C)C(C(O*)=C)C
B931	OCC(=CC(=C)C(C)(C)C)CO*
B932	OCC(C(=C)C=C(C)C)(C)CO*
B933	OC(N(C(=O)C)C(O*)CC)CC
B934	OC(C)CN(C(=O)C)CC(O*)C
B935	OCCCN(C(=O)C)CCCO*
B936	OCC(C)CN(CC(C)C)CC(C)CO*
B937	OCC(CO*)CN(CC(C)C)CC(C)C
B938	OC(C)(C)CN(CC(C)C)CC(O*)(C)C
B939	OC(N(CC(C)C)C(O*)C(C)C)C(C)C
B940	OCCCCCCCCN(CCCCCCCC)CCCCCCCCO*
B941	OC(CCN(CCCCCCCC)CCC(O*)CCCCC)CCCCC
B942	OC(CCCN(CCCCCCCC)CCCC(O*)CCCC)CCCC
B943	OC(CCC)CCCCN(CCCCCCCC)CCCCC(O*)CCC
B944	OC(CC)CCCCCN(CCCCCCCC)CCCCCC(O*)CC
B945	OC(C)CCCCCCN(CCCCCCCC)CCCCCCC(O*)C
B946	OC(C(=C)C(O*)(C)C)(C)C
B947	OCC(C(=C)C(C)C)CO*
B948	OCC(C(=C)C(C)CO*)C
B949	OCC(NC=O)(C)CO*
B950	OCC(NC(=O)C)CO*
B951	OCC(C(=O)CC(=O)C(C)(C)C)(C)CO*
B952	OCC(C(=O)CC(=O)C(C)(C)CO*)(C)C
B953	OCOc1nc(NC(=O)NS(=O)(=O)c2ncccc2C(=O)N(C)C)nc(OCO*)c1
B954	OCC(C)CCCC(C)CCCC(C)CCCCC(C)CCCC(C)CCCC(C)CO*
B955	OC(CC(C)CCCCC(C)CC(O*)CC(C)CCCC(C)C)CC(C)CCCC(C)C
B956	OC(CCC(C)CCCC(C)C)C(C)CCCCC(C)C(O*)CCC(C)CCCC(C)C
B957	OCC(CCCCC(CO*)CCCC(C)CCCC(C)C)CCCC(C)CCCC(C)C
B958	OC(C)(C)CCCC(C)CCCC(C)CCCCC(C)CCCC(C)CCCC(O*)(C)C
B959	OC(CCC(C)CCCC(C)CCCCC(C)CCCC(C)CCC(O*)C(C)C)C(C)C
B960	OC(CC(C)C)CC(C)CCCC(C)CCCCC(C)CCCC(C)CC(O*)CC(C)C
B961	OC(CCC(C)C)C(C)CCCC(C)CCCCC(C)CCCC(C)C(O*)CCC(C)C
B962	OC(C)(CCCC(C)C)CCCC(C)CCCCC(C)CCCC(O*)(C)CCCC(C)C
B963	OCC(CCCC(C)C)CCCC(C)CCCCC(C)CCCC(CO*)CCCC(C)C
B964	OC(CCC(C)CCCCC(C)CCC(O*)C(C)CCCC(C)C)C(C)CCCC(C)C
B965	OC(=C(C)C)CCC(=CCCC(=CCCC=C(C)CCC=C(C)CCC(O*)=C(C)C)C)C
B966	OCC(=CCCC=C(CO*)CCC=C(C)CCC=C(C)C)CCC=C(C)CCC=C(C)C
B967	OCC(=CCCC(=CCCC=C(C)CCC=C(CO*)CCC=C(C)C)C)CCC=C(C)C
B968	OCC(=CCCC(=CCCC(=CCCC=C(C)CCC=C(C)CCC=C(C)CO*)C)C)C
B969	OC(=C(C)CCC=C(C)C)CCC(=CCCC=C(C)CCC(O*)=C(C)CCC=C(C)C)C
B970	OCN(C)CCCCCCN(C)CO*
B971	OC(N(C)C)CCCCC(O*)N(C)C
B972	OC(CN(C)C)CCC(O*)CN(C)C
B973	OC(=CC=C(O*)C)C
B974	OCC=CC=CCO*
B975	OCCCSCCCO*
B976	OC(C)CSCC(O*)C
B977	OC1NC(O*)CCCC1
B978	OC1CNCC(O*)CC1
B979	OC1CCNCCC1O*
B980	OCN(C)CCCCN(C)CO*
B981	OCN(C)CC#CCN(C)CO*
B982	ON(CC)CCN(O*)CC
B983	OC(NCCNC(O*)C)C
B984	OCCNCCNCCO*
B985	OC1=CCCC(O*)=CCC1
B986	OC1=CCCC=C(O*)CC1
B987	OC1C=CC(O*)CC=CC1
B988	OCCOCOCCO*
B989	OC(CNCC(O*)CC)CC
B990	OC(C)CCNCCC(O*)C
B991	OCCCCNCCCCO*
B992	OCC(c1cc(C(=O)CCCC#C)cc(C(C)(C)CO*)c1)(C)C
B993	OCCCCC#CC#CCCCCO*
B994	OC(CCNCCC(O*)CCCCC)CCCCC
B995	OC(CCCNCCCC(O*)CCCC)CCCC
B996	OC(CCC)CCCCNCCCCC(O*)CCC
B997	OC(CC)CCCCCNCCCCCC(O*)CC
B998	OC(C)CCCCCCNCCCCCCC(O*)C
B999	OCCCCCCCCNCCCCCCCCO*
B1000	OC(C)CCCCCCCCNCCCCCCCCC(O*)C
B1001	OCCCCCCCCCCNCCCCCCCCCCO*
B1002	OC(CCCNCCCC(O*)CCCCCC)CCCCCC
B1003	OC(CCCCNCCCCC(O*)CCCCC)CCCCC
B1004	OC(CCCC)CCCCCNCCCCCC(O*)CCCC
B1005	OC(CCC)CCCCCCNCCCCCCC(O*)CCC
B1006	OC(CC)CCCCCCCNCCCCCCCC(O*)CC
B1007	Oc1oc(O*)cc(=S)c1
B1008	Oc1cocc(O*)c1=S
B1009	Oc1sc(O*)cc(=S)c1
B1010	Oc1cscc(O*)c1=S
B1011	Oc1cc(O*)cc(S(OC)(OC)CC)c1
B1012	Oc1cccc(O*)c1S(OC)(OC)CC
B1013	OCOS(OCO*)(c1ccccc1)CC
B1014	OC1(C(=O)C2(O*)CC2)CC1
B1015	Oc1nc(O*)cc(NC)c1
B1016	Oc1cncc(O*)c1NC
B1017	OC1C(=O)NC(=O)C(O*)C1
B1018	OCCCCCCCCCCCCCCCCCO*
B1019	OC(C)CCCCCCCCCCCCCC(O*)C
B1020	OC(CC)CCCCCCCCCCCC(O*)CC
B1021	OC(CCC)CCCCCCCCCC(O*)CCC
B1022	OC(CCCC)CCCCCCCC(O*)CCCC
B1023	OC(CCCCC)CCCCCC(O*)CCCCC
B1024	OCC1(CO*)OCCC1C
B1025	Oc1nc(O*)cc(C(=O)C)c1
B1026	Oc1cncc(O*)c1C(=O)C
B1027	Oc1nc(O*)cc(N(C)C)c1
B1028	Oc1cncc(O*)c1N(C)C
B1029	OCN(c1ccncc1)CO*
B1030	Oc1nc(O*)cc(CCC)c1
B1031	Oc1cncc(O*)c1CCC
B1032	Oc1cc(N=S=O)cc(O*)c1
B1033	Oc1cccc(O*)c1N=S=O
B1034	OCCCCCCCCCCC(C)CCCCCCCCCCO*
B1035	OC(C)CCCCCCCCC(C)CCCCCCCCC(O*)C
B1036	OC(CC)CCCCCCCC(C)CCCCCCCC(O*)CC
B1037	OC(CCC)CCCCCCC(C)CCCCCCC(O*)CCC
B1038	OC(CCCC)CCCCCC(C)CCCCCC(O*)CCCC
B1039	OC(CCCCC)CCCCC(C)CCCCC(O*)CCCCC
B1040	OC(CCCCCC)CCCC(C)CCCC(O*)CCCCCC
B1041	OCCCCCC(C)CCCCCCCCC(C)CCCCCO*
B1042	OC(C)CCCC(C)CCCCCCCCC(C)CCCC(O*)C
B1043	OC(CC)CCC(C)CCCCCCCCC(C)CCC(O*)CC
B1044	OC(CCC)CC(C)CCCCCCCCC(C)CC(O*)CCC
B1045	OC(CCCC)C(C)CCCCCCCCC(C)C(O*)CCCC
B1046	OC(C)(CCCCC)CCCCCCCCC(O*)(C)CCCCC
B1047	OCC(CCCCC)CCCCCCCCC(CO*)CCCCC
B1048	OC(CCCCCCC(O*)C(C)CCCCC)C(C)CCCCC
B1049	OC1CCCC(O*)C1CC=C
B1050	OC1CC(O*)CC(CC=C)C1
B1051	OC1CCCC(O*)C1C(=O)CC
B1052	OC1CC(O*)CC(C(=O)CC)C1
B1053	OCc1nc(C)c(C)nc1CO*
B1054	OCc1nc(CO*)c(C)nc1C
B1055	OCc1nc(C)c(CO*)nc1C
B1056	OC1C(=C)C(O*)CC(C(C)C)C1
B1057	OCC(CO*)C1CCC(=C)CC1
B1058	OC1CC(C)CC(O*)C1C(=C)C
B1059	OC1CC(C(=C)C)CC(O*)C1C
B1060	OCC(C)(CO*)C1CCCC1
B1061	OC1CCC(O*)C1C(C)(C)C
B1062	OCS(C=C)(c1ccccc1)CO*
B1063	Oc1cccc(O*)c1S(C=C)(C)C
B1064	Oc1cc(O*)cc(S(C=C)(C)C)c1
B1065	Oc1cc(O*)cc(C(OC)OC)c1
B1066	Oc1cccc(O*)c1C(OC)OC
B1067	OCOC(OCO*)c1ccccc1
B1068	OC1CCCCC1C(c1ccccc1)(CCCC)C1CCCCC1O*
B1069	OC1CCCC(C(c2ccccc2)(CCCC)C2CCCC(O*)C2)C1
B1070	OC1CCC(C(c2ccccc2)(CCCC)C2CCC(O*)CC2)CC1
B1071	Oc1cccc(O*)c1-n1nccc1
B1072	Oc1cc(O*)cc(-n2nccc2)c1
B1073	OC1CNCC(O*)C1CC
B1074	OCCCCC(CN(C(=O)C(C)C)CC(CC)CCCCO*)CC
B1075	OC(C)C(CN(C(=O)C(C)C)CC(CCCC)C(O*)C)CCCC
B1076	OCCC(CN(C(=O)C(C)C)CC(CCO*)CCCC)CCCC
B1077	OC(C)CCC(CN(C(=O)C(C)C)CC(CC)CCC(O*)C)CC
B1078	OC(CN(C(=O)C(C)C)CC(O*)(CC)CCCC)(CC)CCCC
B1079	Oc1cc(C(c2ccc(C#N)c(O*)c2)n2ncnc2)ccc1C#N
B1080	Oc1cc(C#N)ccc1C(c1ccc(C#N)cc1O*)n1ncnc1
B1081	OC1=C(C2=C(O*)CCCC2)CCCC1
B1082	OC1C=C(C2=CC(O*)CCC2)CCC1
B1083	OC1CC=C(C2=CCC(O*)CC2)CC1
B1084	OC1C(C2=CCCCC2O*)=CCCC1
B1085	OCCCCCSSCCCCCO*
B1086	OC(C)CCCSSCCCC(O*)C
B1087	OC(CC)CCSSCCC(O*)CC
B1088	OC(CSSCC(O*)CCC)CCC
B1089	ON(CC)CCNCCN(O*)CC
B1090	OC(NCCNCCNC(O*)C)C
B1091	OCCNCCNCCNCCO*
B1092	OCCCCCCCCCCCCCCCCCCO*
B1093	OC(C)CCCCCCCCCCCCCCC(O*)C
B1094	OC(CC)CCCCCCCCCCCCC(O*)CC
B1095	OC(CCC)CCCCCCCCCCC(O*)CCC
B1096	OC(CCCC)CCCCCCCCC(O*)CCCC
B1097	OC(CCCCC)CCCCCCC(O*)CCCCC
B1098	OCCCCCCCCC=CCCCCCCCCO*
B1099	OC(CCC=CCCC(O*)CCCCC)CCCCC
B1100	OC(CCCC=CCCCC(O*)CCCC)CCCC
B1101	OC(CCC)CCCCC=CCCCCC(O*)CCC
B1102	OC(CC)CCCCCC=CCCCCCC(O*)CC
B1103	OC(C)CCCCCCC=CCCCCCCC(O*)C
B1104	OCCCCCCCCCCCCCCCO*
B1105	OC(C)CCCCCCCCCCCC(O*)C
B1106	OC(CC)CCCCCCCCCC(O*)CC
B1107	OC(CCC)CCCCCCCC(O*)CCC
B1108	OC(CCCC)CCCCCC(O*)CCCC
B1109	OCCCCCCCCCCCCCCO*
B1110	OC(C)CCCCCCCCCCC(O*)C
B1111	OC(CC)CCCCCCCCC(O*)CC
B1112	OC(CCC)CCCCCCC(O*)CCC
B1113	OC(CCCC)CCCCC(O*)CCCC
B1114	OCCCCCCCCCCCCCCCCCCCCCO*
B1115	OC(C)CCCCCCCCCCCCCCCCCC(O*)C
B1116	OC(CC)CCCCCCCCCCCCCCCC(O*)CC
B1117	OC(CCC)CCCCCCCCCCCCCC(O*)CCC
B1118	OC(CCCC)CCCCCCCCCCCC(O*)CCCC
B1119	OC(CCCCC)CCCCCCCCCC(O*)CCCCC
B1120	OC(CCCCCC)CCCCCCCC(O*)CCCCCC
B1121	OCC(=C1C(=C(C)C)C(C)(C)C1(C)C)CO*
B1122	OCC(=C1C(=C(C)CO*)C(C)(C)C1(C)C)C
B1123	OCC1(CO*)C(=C(C)C)C(=C(C)C)C1(C)C
B1124	Oc1nc(-c2nc(O*)cc(C)c2)cc(C)c1
B1125	Oc1c(-c2nccc(C)c2O*)nccc1C
B1126	Oc1cnc(-c2ncc(O*)c(C)c2)cc1C
B1127	OCc1ccnc(-c2nccc(CO*)c2)c1
B1128	Oc1ccc(C2CC2c2ccc(O*)cc2)cc1
B1129	Oc1cccc(C2CC2c2cccc(O*)c2)c1
B1130	Oc1ccccc1C1CC1c1ccccc1O*
B1131	Oc1ccc2c(c1)-c1cc(O*)ccc1CC(=O)C2
B1132	Oc1ccc2c(c1)CC(=O)Cc1cc(O*)ccc1-2
B1133	Oc1cccc2c1CC(=O)Cc1c(O*)cccc1-2
B1134	Oc1cccc2c1-c1c(O*)cccc1CC(=O)C2
B1135	Oc1cccc2c1C(=CCCN(C)C)c1c(O*)cccc1S2
B1136	Oc1ccc2c(c1)C(=CCCN(C)C)c1cc(O*)ccc1S2
B1137	Oc1ccc2c(c1)Sc1cc(O*)ccc1C2=CCCN(C)C
B1138	Oc1cccc2c1Sc1c(O*)cccc1C2=CCCN(C)C
B1139	Oc1ccc(SSc2ccc(O*)cc2)cc1
B1140	Oc1cccc(SSc2cccc(O*)c2)c1
B1141	Oc1ccccc1SSc1ccccc1O*
B1142	Oc1ccc2c(c1)C(=O)c1cc(O*)ccc1C2
B1143	Oc1ccc2c(c1)Cc1cc(O*)ccc1C2=O
B1144	Oc1cccc2c1Cc1c(O*)cccc1C2=O
B1145	Oc1cccc2c1C(=O)c1c(O*)cccc1C2
B1146	OC1(C#CC#CC2(O*)CC2)CC1
B1147	Oc1ccc(O*)c2c1C(=O)C(c1ccccc1)C2=O
B1148	OC1CCC(C(c2ccccc2)(CC(CC)CCCC)C2CCC(O*)CC2)CC1
B1149	OC1CCC(C(c2ccccc2)(C(C)CCCCCC)C2CCC(O*)CC2)CC1
B1150	Oc1nc(-c2nc(-c3nc(O*)ccc3)ccc2)ccc1
B1151	Oc1cnc(-c2nc(-c3ncc(O*)cc3)ccc2)cc1
B1152	Oc1ccnc(-c2nc(-c3nccc(O*)c3)ccc2)c1
B1153	Oc1c(-c2nc(-c3ncccc3O*)ccc2)nccc1
B1154	Oc1ccccc1N=CC=Nc1ccccc1O*
B1155	Oc1cccc(N=CC=Nc2cccc(O*)c2)c1
B1156	Oc1ccc(N=CC=Nc2ccc(O*)cc2)cc1
B1157	OC(c1c(C)nc(C)c(C(O*)C)c1)C
B1158	OCCc1c(C)nc(C)c(CCO*)c1
B1159	OCc1nc(CO*)c(CC)cc1CC
B1160	OCC(Oc1ccccc1NC)CO*
B1161	OC(CCC)C(COc1ccccc1OCC(CC)C(O*)CCC)CC
B1162	OC(CC)CC(COc1ccccc1OCC(CC)CC(O*)CC)CC
B1163	OC(C)CCC(COc1ccccc1OCC(CC)CCC(O*)C)CC
B1164	OCCCCC(COc1ccccc1OCC(CC)CCCCO*)CC
B1165	OC(Oc1ccccc1OC(O*)C(CC)CCCC)C(CC)CCCC
B1166	OC(COc1ccccc1OCC(O*)(CC)CCCC)(CC)CCCC
B1167	OC(C)C(COc1ccccc1OCC(CCCC)C(O*)C)CCCC
B1168	OCCC(COc1ccccc1OCC(CCO*)CCCC)CCCC
B1169	OC1CCCCC1C(c1ccccc1)(CCCCCC)C1CCCCC1O*
B1170	OC1CCCC(C(c2ccccc2)(CCCCCC)C2CCCC(O*)C2)C1
B1171	OC1CCC(C(c2ccccc2)(CCCCCC)C2CCC(O*)CC2)CC1
B1172	Oc1ccc(C(c2ccccc2)(c2ccc(O*)cc2)c2cccc(C)c2)cc1
B1173	Oc1cccc(C(c2ccccc2)(c2cccc(O*)c2)c2cccc(C)c2)c1
B1174	Oc1ccccc1C(c1ccccc1)(c1cccc(C)c1)c1ccccc1O*
B1175	Oc1cc(C(c2ccc(OC#N)c(O*)c2)(C)C)ccc1OC#N
B1176	OCC(C)(CO*)CC(C(=C)C)C
B1177	Oc1ccc(CCCC(c2ccccc2)CCCc2ccc(O*)cc2)cc1
B1178	Oc1ccccc1CCCC(c1ccccc1)CCCc1ccccc1O*
B1179	Oc1cccc(CCCC(c2ccccc2)CCCc2cccc(O*)c2)c1
B1180	OC(c1ccccc1)CCC(c1ccccc1)CCC(O*)c1ccccc1
B1181	Oc1cc(C)ccc1N(c1ccc(C)cc1)c1ccc(C)cc1O*
B1182	Oc1cc(N(c2ccc(C)cc2)c2ccc(C)c(O*)c2)ccc1C
B1183	OCc1ccc(N(c2ccc(C)cc2)c2ccc(CO*)cc2)cc1
B1184	Oc1ccc(C(=O)c2ccccc2C(=O)c2ccc(O*)cc2)cc1
B1185	Oc1ccccc1C(=O)c1ccccc1C(=O)c1ccccc1O*
B1186	Oc1cccc(C(=O)c2ccccc2C(=O)c2cccc(O*)c2)c1
B1187	OCC(C=C)CO*
B1188	OCC(C#C)CO*
B1189	OCC(C(=O)C)CO*
B1190	OCCS(=O)(=O)C(C)(C)S(=O)(=O)CCO*
B1191	OCC(CO*)(S(=O)(=O)CC)S(=O)(=O)CC
B1192	Oc1cc(C)ccc1C1(c2ccc(C)cc2O*)C(=O)Nc2ccccc21
B1193	Oc1cc(C2(c3ccc(C)c(O*)c3)C(=O)Nc3ccccc32)ccc1C
B1194	OCc1ccc(C2(c3ccc(CO*)cc3)C(=O)Nc3ccccc32)cc1
B1195	Oc1cc(C)cc(C2(c3cc(O*)cc(C)c3)OS(=O)(=O)c3ccccc32)c1
B1196	Oc1ccc(C2(c3ccc(O*)c(C)c3)OS(=O)(=O)c3ccccc32)cc1C
B1197	OCc1cccc(C2(c3cccc(CO*)c3)OS(=O)(=O)c3ccccc32)c1
B1198	Oc1c(C)cccc1C1(c2cccc(C)c2O*)OS(=O)(=O)c2ccccc21
B1199	Oc1ccc(C)cc1C1(c2cc(C)ccc2O*)OS(=O)(=O)c2ccccc21
B1200	OCCC(C)(C)CCO*
B1201	OC(C)C(C)(C)C(O*)C
B1202	OCC(CO*)(CC)CC
B1203	OCCOC(OCCO*)(CC)CC
B1204	OCCC(OCC)(OCC)CCO*
B1205	OCC(CO*)(CC)CCCC
B1206	Oc1ccc(OP(=O)(Oc2ccccc2)Oc2ccc(O*)cc2)cc1
B1207	Oc1ccccc1OP(=O)(Oc1ccccc1)Oc1ccccc1O*
B1208	Oc1cccc(OP(=O)(Oc2ccccc2)Oc2cccc(O*)c2)c1
B1209	OCOP(=S)(Oc1ccc(S(=O)=O)cc1)OCO*
B1210	OCCCCCC(CC)CCCCCCCCC(CC)CCCCCO*
B1211	OC(C)CCCC(CC)CCCCCCCCC(CC)CCCC(O*)C
B1212	OC(CC)CCC(CC)CCCCCCCCC(CC)CCC(O*)CC
B1213	OC(CCC)CC(CC)CCCCCCCCC(CC)CC(O*)CCC
B1214	OC(CCCC)C(CC)CCCCCCCCC(CC)C(O*)CCCC
B1215	OC(CC)(CCCCC)CCCCCCCCC(O*)(CC)CCCCC
B1216	OC(C)C(CCCCC)CCCCCCCCC(CCCCC)C(O*)C
B1217	OCCC(CCCCC)CCCCCCCCC(CCO*)CCCCC
B1218	OC(CCCCCCC(O*)C(CC)CCCCC)C(CC)CCCCC
B1219	OC(COCOCC(O*)CCCCC)CCCCC
B1220	OC(CCOCOCCC(O*)CCCC)CCCC
B1221	OC(CCC)CCCOCOCCCC(O*)CCC
B1222	OC(CC)CCCCOCOCCCCC(O*)CC
B1223	OC(C)CCCCCOCOCCCCCC(O*)C
B1224	OCCCCCCCOCOCCCCCCCO*
B1225	OCC(C=CC(=CC)C)CO*
B1226	Oc1ccc(-c2cccc(-c3ccc(O*)cc3)c2-c2ccccc2)cc1
B1227	Oc1ccccc1-c1cccc(-c2ccccc2O*)c1-c1ccccc1
B1228	Oc1cccc(-c2cccc(-c3cccc(O*)c3)c2-c2ccccc2)c1
B1229	Oc1ccc(-c2cccc(-c3cccc(-c4ccc(O*)cc4)c3)c2)cc1
B1230	Oc1ccccc1-c1cccc(-c2cccc(-c3ccccc3O*)c2)c1
B1231	Oc1cccc(-c2cccc(-c3cccc(-c4cccc(O*)c4)c3)c2)c1
B1232	Oc1ccc(-c2ccc(O*)c(-c3ccccc3)c2)cc1-c1ccccc1
B1233	Oc1cc(-c2ccccc2)cc(-c2cc(O*)cc(-c3ccccc3)c2)c1
B1234	OCOP(=S)(OCO*)SCC(=O)NCC
B1235	ON(C(=O)N(O*)CC)CC
B1236	OC(NC(=O)NC(O*)C)C
B1237	OCCNC(=O)NCCO*
B1238	OC(C=C1C(=O)C(=CC(O*)=Cc2ccccc2OC)CC1)=Cc1ccccc1OC
B1239	Oc1cccc(OC)c1C=CC=C1C(=O)C(=CC=Cc2c(O*)cccc2OC)CC1
B1240	Oc1ccc(OC)c(C=CC=C2C(=O)C(=CC=Cc3cc(O*)ccc3OC)CC2)c1
B1241	Oc1ccc(C=CC=C2C(=O)C(=CC=Cc3ccc(O*)cc3OC)CC2)c(OC)c1
B1242	Oc1cccc(C=CC=C2C(=O)C(=CC=Cc3cccc(O*)c3OC)CC2)c1OC
B1243	OCOc1ccccc1C=CC=C1C(=O)C(=CC=Cc2ccccc2OCO*)CC1
B1244	OC(=CC=C1C(=O)C(=CC=C(O*)c2ccccc2OC)CC1)c1ccccc1OC
B1245	OC(C=C1C(=O)C(=CC(O*)=Cc2ccccc2OC)CCC1)=Cc1ccccc1OC
B1246	Oc1cccc(OC)c1C=CC=C1C(=O)C(=CC=Cc2c(O*)cccc2OC)CCC1
B1247	Oc1ccc(OC)c(C=CC=C2C(=O)C(=CC=Cc3cc(O*)ccc3OC)CCC2)c1
B1248	Oc1ccc(C=CC=C2C(=O)C(=CC=Cc3ccc(O*)cc3OC)CCC2)c(OC)c1
B1249	Oc1cccc(C=CC=C2C(=O)C(=CC=Cc3cccc(O*)c3OC)CCC2)c1OC
B1250	OCOc1ccccc1C=CC=C1C(=O)C(=CC=Cc2ccccc2OCO*)CCC1
B1251	OC(=CC=C1C(=O)C(=CC=C(O*)c2ccccc2OC)CCC1)c1ccccc1OC
B1252	OC(C=C1C(=O)C(=CC(O*)=Cc2ccccc2OC)CC(C)C1)=Cc1ccccc1OC
B1253	Oc1cccc(OC)c1C=CC=C1C(=O)C(=CC=Cc2c(O*)cccc2OC)CC(C)C1
B1254	Oc1ccc(OC)c(C=CC=C2C(=O)C(=CC=Cc3cc(O*)ccc3OC)CC(C)C2)c1
B1255	Oc1ccc(C=CC=C2C(=O)C(=CC=Cc3ccc(O*)cc3OC)CC(C)C2)c(OC)c1
B1256	Oc1cccc(C=CC=C2C(=O)C(=CC=Cc3cccc(O*)c3OC)CC(C)C2)c1OC
B1257	OCOc1ccccc1C=CC=C1C(=O)C(=CC=Cc2ccccc2OCO*)CC(C)C1
B1258	OC(=CC=C1C(=O)C(=CC=C(O*)c2ccccc2OC)CC(C)C1)c1ccccc1OC
B1259	OC(C=C1C(=O)C(=CC(O*)=Cc2ccccc2OC)CCCC1)=Cc1ccccc1OC
B1260	Oc1cccc(OC)c1C=CC=C1C(=O)C(=CC=Cc2c(O*)cccc2OC)CCCC1
B1261	Oc1ccc(OC)c(C=CC=C2C(=O)C(=CC=Cc3cc(O*)ccc3OC)CCCC2)c1
B1262	Oc1ccc(C=CC=C2C(=O)C(=CC=Cc3ccc(O*)cc3OC)CCCC2)c(OC)c1
B1263	Oc1cccc(C=CC=C2C(=O)C(=CC=Cc3cccc(O*)c3OC)CCCC2)c1OC
B1264	OCOc1ccccc1C=CC=C1C(=O)C(=CC=Cc2ccccc2OCO*)CCCC1
B1265	OC(=CC=C1C(=O)C(=CC=C(O*)c2ccccc2OC)CCCC1)c1ccccc1OC
B1266	OC(C=C1C(=O)C(=CC(O*)=Cc2ccccc2OC)CCCCC1)=Cc1ccccc1OC
B1267	Oc1cccc(OC)c1C=CC=C1C(=O)C(=CC=Cc2c(O*)cccc2OC)CCCCC1
B1268	Oc1ccc(OC)c(C=CC=C2C(=O)C(=CC=Cc3cc(O*)ccc3OC)CCCCC2)c1
B1269	Oc1ccc(C=CC=C2C(=O)C(=CC=Cc3ccc(O*)cc3OC)CCCCC2)c(OC)c1
B1270	Oc1cccc(C=CC=C2C(=O)C(=CC=Cc3cccc(O*)c3OC)CCCCC2)c1OC
B1271	OCOc1ccccc1C=CC=C1C(=O)C(=CC=Cc2ccccc2OCO*)CCCCC1
B1272	OC(=CC=C1C(=O)C(=CC=C(O*)c2ccccc2OC)CCCCC1)c1ccccc1OC
B1273	Oc1ccc(OS(Oc2ccccc2)(Oc2ccccc2)Oc2ccc(O*)cc2)cc1
B1274	Oc1cccc(OS(Oc2ccccc2)(Oc2ccccc2)Oc2cccc(O*)c2)c1
B1275	Oc1ccccc1OS(Oc1ccccc1)(Oc1ccccc1)Oc1ccccc1O*
B1276	OC#Cc1ccc(Sc2ccc(C#CO*)cc2)cc1
B1277	Oc1cc(Sc2ccc(C#C)c(O*)c2)ccc1C#C
B1278	Oc1cc(C#C)ccc1Sc1ccc(C#C)cc1O*
B1279	Oc1c(C#C)cc2c(C#C)c(O*)ccc2c1
B1280	OC#Cc1ccc(Oc2ccc(C#CO*)cc2)cc1
B1281	Oc1cc(Oc2ccc(C#C)c(O*)c2)ccc1C#C
B1282	Oc1cc(C#C)ccc1Oc1ccc(C#C)cc1O*
B1283	OC#Cc1ccc2ccc(C#CO*)cc2c1
B1284	Oc1c(C#C)cc2cc(C#C)c(O*)cc2c1
B1285	OC#Cc1cccc2c(C#CO*)cccc12
B1286	Oc1ccc2c(C#C)c(O*)ccc2c1C#C
B1287	Oc1cc(C#C)c2cc(O*)cc(C#C)c2c1
B1288	Oc1ccc(C#C)c2c(O*)ccc(C#C)c12
B1289	Oc1cc(N(c2ccc(C)c(O*)c2)c2cccc(C)c2)ccc1C
B1290	Oc1cc(C)ccc1N(c1cccc(C)c1)c1ccc(C)cc1O*
B1291	OCc1ccc(N(c2ccc(CO*)cc2)c2cccc(C)c2)cc1
B1292	Oc1ccc(O*)c2c(=O)c12
B1293	Oc1ccc2c(c1)C(=O)c1cc(O*)ccc1C2=O
B1294	Oc1ccc2c(c1)C(=O)c1ccc(O*)cc1C2=O
B1295	Oc1ccc(O*)c2c1C(=O)c1ccccc1C2=O
B1296	Oc1cccc2c1C(=O)c1cccc(O*)c1C2=O
B1297	Oc1cccc2c1C(=O)c1c(O*)cccc1C2=O
B1298	Oc1ccc(O*)c2c1C(=O)C=CC2=O
B1299	OC(CC)CC(Cc1ccccc1CC(CC)CC(O*)CC)CC
B1300	OC(C)CCC(Cc1ccccc1CC(CC)CCC(O*)C)CC
B1301	OCCCCC(Cc1ccccc1CC(CC)CCCCO*)CC
B1302	OC(Cc1ccccc1CC(O*)(CC)CCCC)(CC)CCCC
B1303	OC(C)C(Cc1ccccc1CC(CCCC)C(O*)C)CCCC
B1304	OCCC(Cc1ccccc1CC(CCO*)CCCC)CCCC
B1305	OC(CCC)C(Cc1ccccc1CC(CC)C(O*)CCC)CC
B1306	OC(c1ccccc1C(O*)CC)CC
B1307	OC(CC)CCCCCc1ccccc1CCCCCC(O*)CC
B1308	OC(C)CCCCCCc1ccccc1CCCCCCC(O*)C
B1309	OCCCCCCCCc1ccccc1CCCCCCCCO*
B1310	OC(CCc1ccccc1CCC(O*)CCCCC)CCCCC
B1311	OC(CCCc1ccccc1CCCC(O*)CCCC)CCCC
B1312	OC(CCC)CCCCc1ccccc1CCCCC(O*)CCC
B1313	OCCC(C)C(C)CCO*
B1314	OC(C)C(C)C(C)C(O*)C
B1315	OCC(CC)C(CO*)CC
B1316	OCC(CO*)C(C)C(C)(C)C
B1317	OCC(C)(CO*)C(C)C(C)C
B1318	OCCN(C(=O)N(CC)CCO*)CC
B1319	OCCN(C(=O)N(CC)CC)CCO*
B1320	OC(N(C(=O)N(CC)CC)C(O*)C)C
B1321	OC(N(C(=O)N(CC)C(O*)C)CC)C
B1322	OC(=C(C(=C(O*)C)C)C)C
B1323	OCC=C(C(=CCO*)C)C
B1324	OCC(=CC)C(=CC)CO*
B1325	OCCC(=N)CCO*
B1326	OCN(CO*)C(OCC)OCC
B1327	OCCOC(OCCO*)N(C)C
B1328	OCC(CO*)(CC)CCC(C)C
B1329	OCC(CO*)CCC(C)(C)CC
B1330	OCC1(CO*)C(=C)N(C)c2ccccc21
B1331	Oc1ccc(O*)c2c1C(=O)N(C)C2=O
B1332	Oc1cc(O*)c(OC)c(OC)c1OC
B1333	OCOc1cccc(OCO*)c1OC
B1334	OCC1(CO*)C(=O)NC(=O)N1
B1335	Oc1ccc(-c2ccc(O*)cc2)cc1
B1336	Oc1ccccc1-c1ccccc1O*
B1337	Oc1cccc(-c2cccc(O*)c2)c1
B1338	OC1=CC(=O)C(O*)=CC1=O
B1339	OC1=CC(=O)C=C(O*)C1=O
B1340	Oc1c(Cc2cc(C(C)(C)C)cc(C(C)(C)C)c2O*)cc(C(C)(C)C)cc1C(C)(C)C
B1341	OCC(c1cc(Cc2cc(C(C)(C)C)cc(C(C)(C)C)c2)cc(C(C)(C)CO*)c1)(C)C
B1342	OCC(c1cc(Cc2cc(C(C)(C)C)cc(C(C)(C)CO*)c2)cc(C(C)(C)C)c1)(C)C
B1343	Oc1c(C(C)(C)C)cc(Cc2cc(C(C)(C)C)c(O*)c(C(C)(C)C)c2)cc1C(C)(C)C
B1344	OCC(CO*)CCCC(C)(C)C
B1345	OCC(C)(CO*)CCCC(C)C
B1346	OSCCCCSO*
B1347	OSCCCCCCSO*
B1348	OSCCCCCCCCSO*
B1349	OC(CS)CCCCC(O*)CS
B1350	OC(CCS)CCC(O*)CCS
B1351	OCCC1(CCO*)OC1
B1352	OCC1OC(CO*)C1
B1353	OC1C(=C)C(O*)CCC1
B1354	OC1CC(=C)CC(O*)C1
B1355	Oc1c(O*)cn(C)c1
B1356	Oc1ccc(O*)n1C
B1357	OCC1(CO*)CNCCC1
B1358	OCC1(CO*)C(=O)CCCC1
B1359	Oc1cc(O*)cc(S(=O)C)c1
B1360	Oc1cccc(O*)c1S(=O)C
B1361	OC1CCC=C2CCCC(O*)C21
B1362	OCC(CO*)C1CC=C(C)CC1
B1363	Oc1cc(O*)cc(C(C#N)(C)C)c1
B1364	Oc1cccc(O*)c1C(C#N)(C)C
B1365	OCC(C#N)(c1ccccc1)CO*
B1366	Oc1oc(Cc2oc(O*)cc2)cc1
B1367	Oc1coc(Cc2occ(O*)c2)c1
B1368	Oc1c(Cc2occc2O*)occ1
B1369	Oc1ccc(O*)c2cnncc12
B1370	Oc1nnc(O*)c2ccccc12
B1371	Oc1c(C)cc(C(C)(C)C)cc1Cc1cc(C(C)(C)C)cc(C)c1O*
B1372	Oc1c(Cc2cc(C)cc(C(C)(C)C)c2O*)cc(C)cc1C(C)(C)C
B1373	OCc1cc(Cc2cc(CO*)cc(C(C)(C)C)c2)cc(C(C)(C)C)c1
B1374	Oc1c(C)cc(Cc2cc(C)c(O*)c(C(C)(C)C)c2)cc1C(C)(C)C
B1375	OCC(c1cc(C)cc(Cc2cc(C)cc(C(C)(C)CO*)c2)c1)(C)C
B1376	OCCCCN(C(=O)N1CCCC1)CCN(C(=O)N1CCCC1)CCCCO*
B1377	OC1CN(C(=O)N(CCN(C(=O)N2CCC(O*)C2)CCCC)CCCC)CC1
B1378	OC1N(C(=O)N(CCN(C(=O)N2CCCC2O*)CCCC)CCCC)CCC1
B1379	OC(C)CCN(C(=O)N1CCCC1)CCN(C(=O)N1CCCC1)CCC(O*)C
B1380	OC(CN(C(=O)N1CCCC1)CCN(C(=O)N1CCCC1)CC(O*)CC)CC
B1381	OC(N(C(=O)N1CCCC1)CCN(C(=O)N1CCCC1)C(O*)CCC)CCC
B1382	Oc1cccc(O*)c1C(=O)C(=N)C
B1383	Oc1cc(O*)cc(C(=O)C(=N)C)c1
B1384	Oc1ccc(O*)c2c1CCCC2
B1385	OC1c2ccccc2C(O*)CC1
B1386	Oc1ccc(O*)c2c1CC2
B1387	Oc1cc(OC)cc(-c2cc(O*)cc(OC)c2)c1
B1388	Oc1ccc(-c2ccc(O*)c(OC)c2)cc1OC
B1389	OCOc1cccc(-c2cccc(OCO*)c2)c1
B1390	Oc1c(OC)cccc1-c1cccc(OC)c1O*
B1391	Oc1ccc(OC)cc1-c1cc(OC)ccc1O*
B1392	Oc1ccc2ccc(-c3nc4cc(O*)ccc4cc3)nc2c1
B1393	Oc1cccc2ccc(-c3nc4c(O*)cccc4cc3)nc12
B1394	Oc1ccc2nc(-c3nc4ccc(O*)cc4cc3)ccc2c1
B1395	Oc1cccc2nc(-c3nc4cccc(O*)c4cc3)ccc12
B1396	Oc1cc(-c2nc3ccccc3c(O*)c2)nc2ccccc12
B1397	Oc1cc(-c2cc(O*)cc(C)c2)cc(C)c1
B1398	Oc1c(-c2cccc(C)c2O*)cccc1C
B1399	Oc1ccc(C)cc1-c1cc(C)ccc1O*
B1400	Oc1ccc(-c2ccc(O*)c(C)c2)cc1C
B1401	OCc1cccc(-c2cccc(CO*)c2)c1
B1402	Oc1cc(C)cc(O*)c1N(C)C
B1403	Oc1cc(N(C)C)cc(O*)c1C
B1404	OCN(c1ccc(C)cc1)CO*
B1405	Oc1nc(Nc2nc(O*)ccc2)ccc1
B1406	Oc1c(Nc2ncccc2O*)nccc1
B1407	Oc1cnc(Nc2ncc(O*)cc2)cc1
B1408	Oc1ccnc(Nc2nccc(O*)c2)c1
B1409	OCC1(CO*)c2ccccc2C(C)(C)C1C
B1410	Oc1ccc(O*)c2c1C(C)(C)C(C)C2(C)C
B1411	OCC1(C)c2ccccc2C(C)(CO*)C1C
B1412	Oc1ccc2c(sc3c(C)c(O*)ccc32)c1C
B1413	Oc1cc(C)c2sc3c(C)cc(O*)cc3c2c1
B1414	Oc1ccc(C)c2sc3c(C)ccc(O*)c3c12
B1415	OCc1cccc2c1sc1c(CO*)cccc12
B1416	Oc1ccc2c(c1)Sc1cc(O*)ccc1N2C
B1417	Oc1ccc2c(c1)N(C)c1cc(O*)ccc1S2
B1418	Oc1cccc2c1N(C)c1c(O*)cccc1S2
B1419	Oc1cccc2c1Sc1c(O*)cccc1N2C
B1420	Oc1cc(C)c2c(c1)CCc1cc(O*)cc(C)c1-2
B1421	Oc1ccc2c(c1C)-c1c(C)c(O*)ccc1CC2
B1422	OCc1cccc2c1-c1c(CO*)cccc1CC2
B1423	Oc1ccc(C)c2c1CCc1c(O*)ccc(C)c1-2
B1424	Oc1cc(O*)cc(N(CC)CC)c1
B1425	Oc1cccc(O*)c1N(CC)CC
B1426	OC(N(c1ccccc1)C(O*)C)C
B1427	OCCN(c1ccccc1)CCO*
B1428	Oc1ccc2cc3cc(O*)ccc3cc2c1
B1429	Oc1ccc2cc3ccc(O*)cc3cc2c1
B1430	Oc1cccc2cc3cccc(O*)c3cc12
B1431	Oc1cccc2cc3c(O*)cccc3cc12
B1432	Oc1ccc(O*)c2cc3ccccc3cc12
B1433	Oc1c2ccccc2c(O*)c2ccccc12
B1434	Oc1ccc(O*)c(OC)c1OC
B1435	OCOc1ccccc1OCO*
B1436	OCCN(c1ccc(N=O)cc1)CCO*
B1437	Oc1cc(O*)cc(C(C)CC)c1
B1438	Oc1cccc(O*)c1C(C)CC
B1439	Oc1ccc(C(=O)CC(=O)c2ccc(O*)cc2)cc1
B1440	Oc1ccccc1C(=O)CC(=O)c1ccccc1O*
B1441	Oc1cccc(C(=O)CC(=O)c2cccc(O*)c2)c1
B1442	Oc1ccc(CCCCc2ccc(O*)cc2)cc1
B1443	Oc1ccccc1CCCCc1ccccc1O*
B1444	Oc1cccc(CCCCc2cccc(O*)c2)c1
B1445	OC(=NCCCN=C(O*)c1ccccc1)c1ccccc1
B1446	Oc1cccc(C=NCCCN=Cc2cccc(O*)c2)c1
B1447	Oc1ccc(C=NCCCN=Cc2ccc(O*)cc2)cc1
B1448	Oc1ccccc1C=NCCCN=Cc1ccccc1O*
B1449	Oc1ccc2sc(SSc3nc4cc(O*)ccc4s3)nc2c1
B1450	Oc1cccc2sc(SSc3nc4c(O*)cccc4s3)nc12
B1451	Oc1ccc2nc(SSc3nc4ccc(O*)cc4s3)sc2c1
B1452	Oc1cccc2nc(SSc3nc4cccc(O*)c4s3)sc12
B1453	ON1C(=O)C(=O)N(O*)C1=O
B1454	OC1C(=O)C(O*)CC1
B1455	OC1CC(=O)CC1O*
B1456	ON1C(=O)N(O*)CC1
B1457	OCC(c1cccc(C(C)(CO*)CC)c1)(C)CC
B1458	OC(C)C(c1cccc(C(C)(C)C(O*)C)c1)(C)C
B1459	OCCC(c1cccc(C(C)(C)CCO*)c1)(C)C
B1460	Oc1ccc2c(C#N)c3ccc(O*)cc3cc2c1
B1461	Oc1cccc2c(C#N)c3cccc(O*)c3cc12
B1462	Oc1ccc2cc3ccc(O*)cc3c(C#N)c2c1
B1463	Oc1cccc2cc3cccc(O*)c3c(C#N)c12
B1464	Oc1ccc2c(c1)Cc1cc(O*)ccc1CC2
B1465	Oc1ccc2c(c1)CCc1cc(O*)ccc1C2
B1466	Oc1cccc2c1CCc1c(O*)cccc1C2
B1467	Oc1cccc2c1Cc1c(O*)cccc1CC2
B1468	Oc1ccc2c(c1)C(=O)c1cc(O*)ccc1CC2
B1469	Oc1ccc2c(c1)CCc1cc(O*)ccc1C2=O
B1470	Oc1cccc2c1CCc1c(O*)cccc1C2=O
B1471	Oc1cccc2c1C(=O)c1c(O*)cccc1CC2
B1472	Oc1ccccc1C(=C)c1ccccc1O*
B1473	Oc1cccc(C(=C)c2cccc(O*)c2)c1
B1474	Oc1ccc(C(=C)c2ccc(O*)cc2)cc1
B1475	OC1(NC(=S)NC2(O*)CCCCC2)CCCCC1
B1476	Oc1cc(C)c(OP(=O)(Oc2c(C)cccc2C)Oc2c(C)cc(O*)cc2C)c(C)c1
B1477	OCc1cccc(CO*)c1OP(=O)(Oc1c(C)cccc1C)Oc1c(C)cccc1C
B1478	OCc1cccc(C)c1OP(=O)(Oc1c(C)cccc1C)Oc1c(C)cccc1CO*
B1479	Oc1ccc(C)c(OP(=O)(Oc2c(C)cccc2C)Oc2c(C)ccc(O*)c2C)c1C
B1480	Oc1cc(S(=O)=O)ccc1Oc1ccc(S(=O)=O)cc1O*
B1481	Oc1cc(Oc2ccc(S(=O)=O)c(O*)c2)ccc1S(=O)=O
B1482	OS(=O)(=O)c1ccc(Oc2ccc(S(=O)(=O)O*)cc2)cc1
B1483	OCN(c1cccc(C)c1)CO*
B1484	Oc1cc(O*)cc(CCC)c1
B1485	Oc1cccc(O*)c1CCC
B1486	Oc1cc(C(=O)C(=O)c2ccc(OC)c(O*)c2)ccc1OC
B1487	OCOc1ccc(C(=O)C(=O)c2ccc(OCO*)cc2)cc1
B1488	Oc1cc(OC)ccc1C(=O)C(=O)c1ccc(OC)cc1O*
B1489	Oc1cc(N(C)C)ccc1C(=S)c1ccc(N(C)C)cc1O*
B1490	Oc1cc(C(=S)c2ccc(N(C)C)c(O*)c2)ccc1N(C)C
B1491	OCN(c1ccc(C(=S)c2ccc(N(C)CO*)cc2)cc1)C
B1492	Oc1cc(C)cc(O*)c1C(=O)C
B1493	Oc1cc(C(=O)C)cc(O*)c1C
B1494	Oc1cc(O*)cc(C(C)C)c1
B1495	Oc1cccc(O*)c1C(C)C
B1496	OCC(c1ccccc1)CO*
B1497	OCOC(OCO*)CNC
B1498	OCN(C1=CC(=O)CC(C)(C)C1)CO*
B1499	OCC1(CO*)CC(=O)C=C(N(C)C)C1
B1500	OCCOC(OCCO*)CC(OCC)CC
B1501	ON(c1ncnc(N(O*)CC)n1)CC
B1502	OC(Nc1ncnc(NC(O*)C)n1)C
B1503	OCCNc1ncnc(NCCO*)n1
B1504	OCCOC(OCC)OCCO*
B1505	OCCOP(OCCO*)CC
B1506	Oc1ccc(NNc2ccc(O*)cc2)cc1
B1507	Oc1cccc(NNc2cccc(O*)c2)c1
B1508	Oc1ccccc1NNc1ccccc1O*
B1509	OC(=CCC=C(O*)c1ccccc1)c1ccccc1
B1510	Oc1cccc(C=CCC=Cc2cccc(O*)c2)c1
B1511	Oc1ccccc1C=CCC=Cc1ccccc1O*
B1512	Oc1ccc(C=CCC=Cc2ccc(O*)cc2)cc1
B1513	Oc1cc(OCC)c(O*)cc1OCC
B1514	OC(Oc1ccc(OC(O*)C)cc1)C
B1515	OCCOc1ccc(OCCO*)cc1
B1516	OCCN1CCN(CCO*)CC1
B1517	OC(N1CCN(C(O*)C)CC1)C
B1518	Oc1ccc2cccc(C=Cc3cccc4ccc(O*)cc34)c2c1
B1519	Oc1cccc2cccc(C=Cc3cccc4cccc(O*)c34)c12
B1520	Oc1ccc2ccccc2c1C=Cc1c(O*)ccc2ccccc12
B1521	Oc1cc(C=Cc2cc(O*)cc3ccccc23)c2ccccc2c1
B1522	Oc1ccc(C=Cc2ccc(O*)c3ccccc23)c2ccccc12
B1523	Oc1cccc2c(C=Cc3ccc(O*)c4ccccc34)cccc12
B1524	Oc1cccc2c(C=Cc3cccc4c(O*)cccc34)cccc12
B1525	Oc1ccc2c(C=Cc3cccc4cc(O*)ccc34)cccc2c1
B1526	OC1N(CCC)C(O*)CC1
B1527	OCCC(CCO*)CCCCCC(CC)CCCC
B1528	OCCCCCCCCCCCCCCSCCCCCCCCCCCCCCO*
B1529	OC(CCCCSCCCCC(O*)CCCCCCCCC)CCCCCCCCC
B1530	OC(C)CCCCCCCCCCCCSCCCCCCCCCCCCC(O*)C
B1531	OC(CC)CCCCCCCCCCCSCCCCCCCCCCCC(O*)CC
B1532	OC(CCC)CCCCCCCCCCSCCCCCCCCCCC(O*)CCC
B1533	OC(CCCC)CCCCCCCCCSCCCCCCCCCC(O*)CCCC
B1534	OC(CCCCC)CCCCCCCCSCCCCCCCCC(O*)CCCCC
B1535	OC(CCCCCC)CCCCCCCSCCCCCCCC(O*)CCCCCC
B1536	OC(CCCCCCSCCCCCCC(O*)CCCCCCC)CCCCCCC
B1537	OC(CCCCCSCCCCCC(O*)CCCCCCCC)CCCCCCCC
B1538	Oc1nnc(O*)cc1
B1539	Oc1cnncc1O*
B1540	OCC(C=C(C)CC(C)(C)C)(C)CO*
B1541	OCC(C)(CO*)CC(=CC(C)(C)C)C
B1542	OCC(=O)CC(=O)CO*
B1543	OCC1OC(C)OC1CO*
B1544	OCN(CO*)CCNCC
B1545	OCC(OOCC)(C)CO*
B1546	OC(=C)CNCC(O*)=C
B1547	OCC1(CO*)CCCC1C
B1548	OCCC(C)(CCO*)C(OC)(CC)CC
B1549	OCCC(OC)(CCO*)C(C)(CC)CC
B1550	Oc1ccc(C(c2ccc(O*)cc2)N2CCC2)cc1
B1551	Oc1cccc(C(c2cccc(O*)c2)N2CCC2)c1
B1552	Oc1ccccc1C(c1ccccc1O*)N1CCC1
B1553	OC(c1ccc(C)c(C2(c3cc(C(O*)(C)C)ccc3C)c3ccccc32)c1)(C)C
B1554	OCC(c1ccc(C)c(C2(c3cc(C(C)CO*)ccc3C)c3ccccc32)c1)C
B1555	Oc1cc(C)c(C2(c3cc(C(C)C)c(O*)cc3C)c3ccccc32)cc1C(C)C
B1556	Oc1cc(C(C)C)cc(C2(c3cc(C(C)C)cc(O*)c3C)c3ccccc32)c1C
B1557	OCc1ccc(C(C)C)cc1C1(c2cc(C(C)C)ccc2CO*)c2ccccc21
B1558	Oc1c(C2(c3c(O*)c(C(C)C)ccc3C)c3ccccc32)c(C)ccc1C(C)C
B1559	OCCC1(CCO*)C(=O)NCC(C)C1=O
B1560	OCN1C(=O)N(C)CN(CN2CN(C)C(=O)N(CO*)C2)C1
B1561	OCN1C(=O)N(CO*)CN(CN2CN(C)C(=O)N(C)C2)C1
B1562	OCC(CO*)CC(=CC(C)C)C
B1563	OCC(C=C(C)CC(C)C)CO*
B1564	Oc1ccc(C(c2ccc(O*)cc2)(C)CC)cc1
B1565	Oc1cccc(C(c2cccc(O*)c2)(C)CC)c1
B1566	Oc1ccccc1C(c1ccccc1O*)(C)CC
B1567	OCCCCCCCCCC(CCCCCCCC)CCCCCCCCCO*
B1568	OC(C)CCCCCCCC(CCCCCCCC)CCCCCCCC(O*)C
B1569	OC(CC)CCCCCCC(CCCCCCCC)CCCCCCC(O*)CC
B1570	OC(CCC)CCCCCC(CCCCCCCC)CCCCCC(O*)CCC
B1571	OC(CCCC)CCCCC(CCCCCCCC)CCCCC(O*)CCCC
B1572	OC(CCCCC)CCCC(CCCCCCCC)CCCC(O*)CCCCC
B1573	OC(CCCCCC)CCC(CCCCCCCC)CCC(O*)CCCCCC
B1574	OC1CC2(C1)CC(O*)C2
B1575	OCCOP(=S)(OCCO*)CC
B1576	OCC(C)COP(=O)(OCC(C)CO*)CC(C)C
B1577	OC(C)(C)COP(=O)(OCC(O*)(C)C)CC(C)C
B1578	OCCCCOP(=O)(OCCCCO*)CCCC
B1579	OC(C)CCOP(=O)(OCCC(O*)C)CCCC
B1580	OC(COP(=O)(OCC(O*)CC)CCCC)CC
B1581	OC(OP(=O)(OC(O*)CCC)CCCC)CCC
B1582	OCC1(CO*)CC(=O)CC(=O)C1
B1583	OCC(OCC)(CO*)CC
B1584	OC(C#CC(O*)(C)CC(C)C)(C)CC(C)C
B1585	OCC(=N)CO*
B1586	OCN(C(=O)C)CO*
B1587	OCC1(CO*)C(=O)N1C
B1588	Oc1c(C)c(O*)c(C(C)(C)C)cc1C(C)(C)C
B1589	OCC(c1cc(C)cc(C(C)(C)C)c1)(C)CO*
B1590	OCC(c1cc(C)cc(C(C)(C)CO*)c1)(C)C
B1591	Oc1ccc2c(c1)C(=O)c1ccc3c4c(ccc-2c14)C(=O)c1cc(O*)ccc1-3
B1592	Oc1cc2c3c(c(O*)cc4c3c1C(=O)c1ccccc1-4)C(=O)c1ccccc1-2
B1593	Oc1cc2c3c(c(O*)cc4c3c1-c1ccccc1C4=O)-c1ccccc1C2=O
B1594	Oc1ccc2c(c1)-c1ccc3c4c(ccc(c14)C2=O)-c1cc(O*)ccc1C3=O
B1595	Oc1cccc2c1-c1ccc3c4c(ccc(c14)C2=O)-c1c(O*)cccc1C3=O
B1596	Oc1cccc2c1C(=O)c1ccc3c4c(ccc-2c14)C(=O)c1c(O*)cccc1-3
B1597	OC1=C(C2=C(O*)C(=O)C(C)=CC2=O)C(=O)C=C(C)C1=O
B1598	OCC1=CC(=O)C(C2=CC(=O)C(CO*)=CC2=O)=CC1=O
B1599	OC1=C(C)C(=O)C=C(C2=CC(=O)C(C)=C(O*)C2=O)C1=O
B1600	OCC(C)(CO*)CC(C(=O)C)(C)C
B1601	OCC(C(=O)C)(CO*)CC(C)(C)C
B1602	OCCCCCCCC(CCC)CCCCCCCO*
B1603	OC(C)CCCCCC(CCC)CCCCCC(O*)C
B1604	OC(CC)CCCCC(CCC)CCCCC(O*)CC
B1605	OC(CCC)CCCC(CCC)CCCC(O*)CCC
B1606	OC(CCCC)CCC(CCC)CCC(O*)CCCC
B1607	Oc1cc2ccc3cc(O*)cc4ccc(c1)c2c34
B1608	Oc1ccc2ccc3ccc(O*)c4ccc1c2c34
B1609	Oc1ccc2ccc3c(O*)ccc4ccc1c2c43
B1610	Oc1cc2cccc3c(O*)cc4cccc1c4c23
B1611	Oc1cc2cccc3cc(O*)c4cccc1c4c23
B1612	Oc1cccc2c1C=Cc1c(O*)cccc1C2=C1CCN(C)CC1
B1613	Oc1ccc2c(c1)C=Cc1cc(O*)ccc1C2=C1CCN(C)CC1
B1614	Oc1ccc2c(c1)C(=C1CCN(C)CC1)c1cc(O*)ccc1C=C2
B1615	Oc1cccc2c1C(=C1CCN(C)CC1)c1c(O*)cccc1C=C2
B1616	OCN(c1ccc(C(c2ccccc2)c2ccc(N(C)CO*)cc2)cc1)C
B1617	Oc1cc(C(c2ccccc2)c2ccc(N(C)C)c(O*)c2)ccc1N(C)C
B1618	Oc1cc(N(C)C)ccc1C(c1ccccc1)c1ccc(N(C)C)cc1O*
B1619	OC(OC(OC(O*)CCCC)C)CCCC
B1620	OC(COC(OCC(O*)CCC)C)CCC
B1621	OC(CC)CCOC(OCCC(O*)CC)C
B1622	OC(C)CCCOC(OCCCC(O*)C)C
B1623	OCCCCCOC(OCCCCCO*)C
B1624	OC(OC(OC(O*)CCC)CC)CCC
B1625	OC(COC(OCC(O*)CC)CC)CC
B1626	OC(C)CCOC(OCCC(O*)C)CC
B1627	OCCCCOC(OCCCCO*)CC
B1628	OC(C)CC(OCCC)CC(O*)C
B1629	OCCCC(OCCC)CCCO*
B1630	OCC(OC(OC(C)C)CCC)CO*
B1631	OC(OC(OC(O*)(C)C)CCC)(C)C
B1632	OCC(OC(OC(C)CO*)CCC)C
B1633	OC(C)(C)COC(OCC(O*)(C)C)CCC
B1634	OCC(C)COC(OCC(C)CO*)CCC
B1635	OC=CC(C=CO*)CCCCCC
B1636	OCC(C(=O)CCCC)CO*
B1637	Oc1c(C)c(O*)c(C)c(N(C)C)c1C
B1638	OCc1cc(C)cc(CO*)c1N(C)C
B1639	OCN(c1c(C)cc(C)cc1C)CO*
B1640	OC12CCC1C1(O*)CCC21
B1641	OCCCO*
B1642	Oc1cc(-c2cc(O*)cc(CC)c2)cc(CC)c1
B1643	OCCc1cccc(-c2cccc(CCO*)c2)c1
B1644	Oc1c(-c2cccc(CC)c2O*)cccc1CC
B1645	Oc1ccc(CC)cc1-c1cc(CC)ccc1O*
B1646	Oc1ccc(-c2ccc(O*)c(CC)c2)cc1CC
B1647	OC(c1cccc(-c2cccc(C(O*)C)c2)c1)C
B1648	Oc1cc(-c2ccc(CC)c(O*)c2)ccc1CC
B1649	OC(c1ccc(-c2ccc(C(O*)C)cc2)cc1)C
B1650	OCCc1ccc(-c2ccc(CCO*)cc2)cc1
B1651	Oc1cc(C(C)(C)C)cc2c1Oc1c(O*)cc(C(C)(C)C)cc1C2(C)C
B1652	Oc1cc2c(cc1C(C)(C)C)C(C)(C)c1cc(C(C)(C)C)c(O*)cc1O2
B1653	OCC(c1ccc2c(c1)C(C)(C)c1cc(C(C)(C)CO*)ccc1O2)(C)C
B1654	Oc1c2c(ccc1C(C)(C)C)Oc1ccc(C(C)(C)C)c(O*)c1C2(C)C
B1655	OCCOP(=S)(OCCO*)SCSC(C)(C)C
B1656	Oc1cc(C)cc(C(CC)C(c2cc(O*)cc(C)c2)CC)c1
B1657	Oc1ccc(C)cc1C(CC)C(c1cc(C)ccc1O*)CC
B1658	Oc1ccc(C(CC)C(c2ccc(O*)c(C)c2)CC)cc1C
B1659	OCc1cccc(C(CC)C(c2cccc(CO*)c2)CC)c1
B1660	Oc1c(C)cccc1C(CC)C(c1cccc(C)c1O*)CC
B1661	OC(C)C(c1cccc(C)c1)C(c1cccc(C)c1)C(O*)C
B1662	OCCC(c1cccc(C)c1)C(c1cccc(C)c1)CCO*
B1663	Oc1cc(CC)ccc1C(=C(c1ccc(CC)cc1O*)CC)CC
B1664	Oc1cc(C(=C(c2ccc(CC)c(O*)c2)CC)CC)ccc1CC
B1665	OCCC(=C(c1ccc(CC)cc1)CCO*)c1ccc(CC)cc1
B1666	OC(c1ccc(C(=C(c2ccc(C(O*)C)cc2)CC)CC)cc1)C
B1667	OCCc1ccc(C(=C(c2ccc(CCO*)cc2)CC)CC)cc1
B1668	Oc1ccc2c(Cc3cccc4cc(O*)ccc34)cccc2c1
B1669	Oc1ccc(Cc2ccc(O*)c3ccccc23)c2ccccc12
B1670	Oc1cccc2c(Cc3ccc(O*)c4ccccc34)cccc12
B1671	Oc1cccc2c(Cc3cccc4c(O*)cccc34)cccc12
B1672	Oc1ccc2cccc(Cc3cccc4ccc(O*)cc34)c2c1
B1673	Oc1cccc2cccc(Cc3cccc4cccc(O*)c34)c12
B1674	Oc1ccc2ccccc2c1Cc1c(O*)ccc2ccccc12
B1675	Oc1cc(Cc2cc(O*)cc3ccccc23)c2ccccc2c1
B1676	Oc1ccc(N(C(=O)NC)c2ccc(O*)cc2)cc1
B1677	Oc1ccccc1N(C(=O)NC)c1ccccc1O*
B1678	Oc1cccc(N(C(=O)NC)c2cccc(O*)c2)c1
B1679	OCC(CO*)C1(C)CC1
B1680	OC1C(O*)C1(C)C(C)C
B1681	OCC1CCCCCC1CO*
B1682	OC1CCCC(O*)C(C)C1C
B1683	OC1CC(O*)CC(C)C(C)C1
B1684	OC1CCCCC(O*)C1CC
B1685	OC1CCC(O*)CC(CC)C1
B1686	OCCCCCCC(CCCCCCO*)C1CCCCC1
B1687	OC(C)CCCCC(CCCCC(O*)C)C1CCCCC1
B1688	OC(CC)CCCC(CCCC(O*)CC)C1CCCCC1
B1689	OC(CCC)CCC(CCC(O*)CCC)C1CCCCC1
B1690	OC(CCCC)CC(CC(O*)CCCC)C1CCCCC1
B1691	OC1CCCCCC(O*)C1CC
B1692	OC1CCCC(O*)CC(CC)C1
B1693	OC1CCC(CC)CCC(O*)C1
B1694	OC1CCC(O*)CC(CCCC)C1
B1695	OCCN(C(=O)C=C(OP(=O)(OC)C)C)CCO*
B1696	OC=CCc1ccccc1CC=CO*
B1697	OC(=C)Cc1ccccc1CC(O*)=C
B1698	OC(C=C)c1ccccc1C(O*)C=C
B1699	Oc1ccc(O*)c(CC=C)c1CC=C
B1700	OC(Cc1ccccc1CC(O*)CCC)CCC
B1701	OC(CC)CCc1ccccc1CCC(O*)CC
B1702	OC(C)CCCc1ccccc1CCCC(O*)C
B1703	OCCCCCc1ccccc1CCCCCO*
B1704	Oc1cc(C(=O)c2ccc(OC)c(O*)c2)ccc1OC
B1705	OCOc1ccc(C(=O)c2ccc(OCO*)cc2)cc1
B1706	Oc1cc(OC)ccc1C(=O)c1ccc(OC)cc1O*
B1707	Oc1cccc2c(N=O)ccc(O*)c12
B1708	OCC(CO*)CNCC
B1709	OCc1cc(C)cc(CO*)c1S(=O)(=O)c1ccc(C)cc1C
B1710	Oc1ccc2c(S(=O)(=O)c3cccc4cc(O*)ccc34)cccc2c1
B1711	Oc1ccc2ccccc2c1S(=O)(=O)c1c(O*)ccc2ccccc12
B1712	Oc1cc(S(=O)(=O)c2cc(O*)cc3ccccc23)c2ccccc2c1
B1713	Oc1ccc(S(=O)(=O)c2ccc(O*)c3ccccc23)c2ccccc12
B1714	Oc1cccc2c(S(=O)(=O)c3ccc(O*)c4ccccc34)cccc12
B1715	Oc1cccc2c(S(=O)(=O)c3cccc4c(O*)cccc34)cccc12
B1716	Oc1ccc2cccc(S(=O)(=O)c3cccc4ccc(O*)cc34)c2c1
B1717	Oc1cccc2cccc(S(=O)(=O)c3cccc4cccc(O*)c34)c12
B1718	OCC(OC(OC(C)C)C(C)C)CO*
B1719	OCC(OC(OC(C)CO*)C(C)C)C
B1720	OCC(CO*)C(OC(C)C)OC(C)C
B1721	OC(OC(OC(O*)(C)C)C(C)C)(C)C
B1722	OCCC(CC)CCCC(CC)CCO*
B1723	OCCC(CCO*)CCCC(CC)CC
B1724	OC(C)C(CC)CCCC(CC)C(O*)C
B1725	OC(CC)(CC)CCCC(O*)(CC)CC
B1726	OCC(C)CCCCCCCCC(C)CO*
B1727	OC(C)(C)CCCCCCCCC(O*)(C)C
B1728	OC(CCCCCCC(O*)C(C)C)C(C)C
B1729	OC(CCCCC(O*)CC(C)C)CC(C)C
B1730	OCCC(CC)CCCCCC(CC)CCO*
B1731	OCCC(CCO*)CCCCCC(CC)CC
B1732	OC(C)C(CC)CCCCCC(CC)C(O*)C
B1733	OC(CC)(CC)CCCCCC(O*)(CC)CC
B1734	OC(CCCC(O*)C(CC)CC)C(CC)CC
B1735	OCCC(CCO*)CCCCCCCCCC
B1736	OC(C)CC(CCCCCCCCCC)CC(O*)C
B1737	OCCCC(CCCO*)CCCCCCCCCC
B1738	OCC(SC)(CO*)CC
B1739	OCCC(CC)CCCCCCCCC(CC)CCO*
B1740	OCCC(CCO*)CCCCCCCCC(CC)CC
B1741	OC(C)C(CC)CCCCCCCCC(CC)C(O*)C
B1742	OC(CC)(CC)CCCCCCCCC(O*)(CC)CC
B1743	OC(CCCCCCC(O*)C(CC)CC)C(CC)CC
B1744	OC(CCCCC(O*)CC(CC)CC)CC(CC)CC
B1745	OC(C)CCC(CCCCCCCCCC)CCC(O*)C
B1746	OCCCCC(CCCCO*)CCCCCCCCCC
B1747	OCCCC(CCC)CCCCCC(CCC)CCCO*
B1748	OCCCC(CCCO*)CCCCCC(CCC)CCC
B1749	OC(C)CC(CCCCCC(CCC)CCC)CC(O*)C
B1750	OC(C)CC(CCC)CCCCCC(CCC)CC(O*)C
B1751	OC(CC)C(CCC)CCCCCC(CCC)C(O*)CC
B1752	OC(CCC)(CCC)CCCCCC(O*)(CCC)CCC
B1753	OC(CCCC(O*)C(CCC)CCC)C(CCC)CCC
B1754	OCCCCC(CCCC)CCCCC(CCCC)CCCCO*
B1755	OCCCCC(CCCCO*)CCCCC(CCCC)CCCC
B1756	OC(CC)CC(CCCCC(CCCC)CCCC)CC(O*)CC
B1757	OC(C)CCC(CCCCC(CCCC)CCCC)CCC(O*)C
B1758	OC(C)CCC(CCCC)CCCCC(CCCC)CCC(O*)C
B1759	OC(CC)CC(CCCC)CCCCC(CCCC)CC(O*)CC
B1760	OC(CCC)C(CCCC)CCCCC(CCCC)C(O*)CCC
B1761	OC(CCCC)(CCCC)CCCCC(O*)(CCCC)CCCC
B1762	OC(C)CCC(CCCCCCCCCCCCCCC)CCC(O*)C
B1763	OCCCCC(CCCCO*)CCCCCCCCCCCCCCC
B1764	OCCCCCC(CCCCCO*)CCCCCC(CCCCC)CCCCC
B1765	OCCCCCC(CCCCC)CCCCCC(CCCCC)CCCCCO*
B1766	OC(C)CCCC(CCCCC)CCCCCC(CCCCC)CCCC(O*)C
B1767	OC(C)CCCC(CCCCCC(CCCCC)CCCCC)CCCC(O*)C
B1768	OC(CC)CCC(CCCCCC(CCCCC)CCCCC)CCC(O*)CC
B1769	OC(CC)CCC(CCCCC)CCCCCC(CCCCC)CCC(O*)CC
B1770	OC(CCC)CC(CCCCC)CCCCCC(CCCCC)CC(O*)CCC
B1771	OC(CCCC)C(CCCCC)CCCCCC(CCCCC)C(O*)CCCC
B1772	OC(CCCCC)(CCCCC)CCCCCC(O*)(CCCCC)CCCCC
B1773	OC(CCCCC)CCC(CCCCCCCCCC)CCC(O*)CCCCC
B1774	OC(CCCC)CCCC(CCCCCCCCCC)CCCC(O*)CCCC
B1775	OC(CCC)CCCCC(CCCCCCCCCC)CCCCC(O*)CCC
B1776	OC(CC)CCCCCC(CCCCCCCCCC)CCCCCC(O*)CC
B1777	OC(C)CCCCCCC(CCCCCCCCCC)CCCCCCC(O*)C
B1778	OCCCCCCCCC(CCCCCCCCO*)CCCCCCCCCC
B1779	OC1CCCC(C(CCCCCCCCCCCCCCC)C2CCCC(O*)C2)C1
B1780	OC1CCC(C(CCCCCCCCCCCCCCC)C2CCC(O*)CC2)CC1
B1781	OC(=C(CC)CCCCCCCCC(=C(O*)C)CC)C
B1782	OCC=C(CC)CCCCCCCCC(=CCO*)CC
B1783	OC(C(=CC)CCCCCCCCC(=CC)C(O*)C)C
B1784	OCCC(=CC)CCCCCCCCC(=CC)CCO*
B1785	OC(CC(=CC)CC)CCCCC(O*)CC(=CC)CC
B1786	Oc1cccc(CC(=CCCCCCCCCCCCCCC)Cc2cccc(O*)c2)c1
B1787	Oc1ccc(CC(=CCCCCCCCCCCCCCC)Cc2ccc(O*)cc2)cc1
B1788	Oc1ccc(P(=O)(c2ccccc2)c2ccc(O*)cc2)cc1
B1789	Oc1cccc(P(=O)(c2ccccc2)c2cccc(O*)c2)c1
B1790	Oc1ccccc1P(=O)(c1ccccc1)c1ccccc1O*
B1791	Oc1ccc2c(oc3cc(O*)ccc32)c1
B1792	Oc1ccc2oc3ccc(O*)cc3c2c1
B1793	Oc1cccc2oc3cccc(O*)c3c12
B1794	Oc1cccc2c1oc1c(O*)cccc12
B1795	Oc1ccc2c(sc3cc(O*)ccc32)c1
B1796	Oc1ccc2sc3ccc(O*)cc3c2c1
B1797	Oc1cccc2sc3cccc(O*)c3c12
B1798	Oc1cccc2c1sc1c(O*)cccc12
B1799	OCC(C)(CO*)C1CCC1
B1800	OC1CC(O*)C1C(C)(C)C
B1801	Oc1cc2c3ccccc3cc3c(O*)cc4cccc1c4c32
B1802	OCC(CO*)CCC#N
B1803	OCC(C)(CC#C)CO*
B1804	OC(C)(C)CN(c1ccccc1)CC(O*)(C)C
B1805	OCC(C)CN(c1ccccc1)CC(C)CO*
B1806	Oc1ccc(N=NC(C)(C)C(N=Nc2ccc(O*)cc2)(C)C)cc1
B1807	Oc1ccccc1N=NC(C)(C)C(N=Nc1ccccc1O*)(C)C
B1808	Oc1cccc(N=NC(C)(C)C(N=Nc2cccc(O*)c2)(C)C)c1
B1809	OCC1(CO*)C=C(C)C(=O)CC1
B1810	Oc1ccc(O*)c2c1C(=O)N(SC)C2=O
B1811	OCCC(CC)CCO*
B1812	OC(C)C(CC)C(O*)C
B1813	OC1CC(O*)C1C
B1814	OCN(C(=O)CCCCCCCC(=O)N(C)CO*)C
B1815	OC(C(=O)N(C)C)CCCCCC(O*)C(=O)N(C)C
B1816	OC(CC(=O)N(C)C)CCCC(O*)CC(=O)N(C)C
B1817	OCC(C=C)(CO*)CC(C)C
B1818	OCC(CO*)CC(C=C)(C)C
B1819	OCS(NC(=O)C)(C)CO*
B1820	OCC(n1nnc(C=C)n1)(C)CO*
B1821	OC1N(CC)C(O*)CCC1
B1822	OC1CN(CC)CC(O*)C1
B1823	OCN(c1nc(N(C)CO*)nc(N2CCCC2)n1)C
B1824	OCCCCC(CCCC)CCCCCC(CCCC)CCCCO*
B1825	OCCCCC(CCCCO*)CCCCCC(CCCC)CCCC
B1826	OC(C)CCC(CCCCCC(CCCC)CCCC)CCC(O*)C
B1827	OC(C)CCC(CCCC)CCCCCC(CCCC)CCC(O*)C
B1828	OC(CC)CC(CCCC)CCCCCC(CCCC)CC(O*)CC
B1829	OC(CCC)C(CCCC)CCCCCC(CCCC)C(O*)CCC
B1830	OC(CCCC)(CCCC)CCCCCC(O*)(CCCC)CCCC
B1831	Oc1ccc(C(c2ccc(O*)cc2)CCCCCCCCCCCCCCC)cc1
B1832	Oc1cccc(C(c2cccc(O*)c2)CCCCCCCCCCCCCCC)c1
B1833	Oc1ccc(CC(Cc2ccc(O*)cc2)CCCCCCCCCCCCCCC)cc1
B1834	Oc1cccc(CC(Cc2cccc(O*)c2)CCCCCCCCCCCCCCC)c1
B1835	Oc1cccc(C(=CCCCCCCCCCCCCCC)c2cccc(O*)c2)c1
B1836	Oc1ccc(C(=CCCCCCCCCCCCCCC)c2ccc(O*)cc2)cc1
B1837	OCCOP(=S)(Oc1nn2cc(CC)c(C)nc2c1)OCCO*
B1838	OC(CCCCC)CCC(CCCCCCCCCCC)CCC(O*)CCCCC
B1839	OC(CCCC)CCCC(CCCCCCCCCCC)CCCC(O*)CCCC
B1840	OC(CCC)CCCCC(CCCCCCCCCCC)CCCCC(O*)CCC
B1841	OC(CC)CCCCCC(CCCCCCCCCCC)CCCCCC(O*)CC
B1842	OC(C)CCCCCCC(CCCCCCCCCCC)CCCCCCC(O*)C
B1843	OCCCCCCCCC(CCCCCCCCO*)CCCCCCCCCCC
B1844	OCCC(CCO*)CCC(C)C
B1845	OC(C)C(CCC(C)C)C(O*)C
B1846	OCC(CO*)CCC(CC)CC
B1847	OCC(C)C(C(C)C)C(C)CO*
B1848	OCC(CO*)C(C(C)C)C(C)C
B1849	OC(C)(C)C(C(C)C)C(O*)(C)C
B1850	OCC(CO*)(CCC)C(C)(C)C
B1851	OCC(C)(CO*)C(C)(C)CCC
B1852	Oc1ccc(C(=O)C(=O)c2ccc(O*)cc2)cc1
B1853	Oc1ccccc1C(=O)C(=O)c1ccccc1O*
B1854	Oc1cccc(C(=O)C(=O)c2cccc(O*)c2)c1
B1855	Oc1cc(O*)c(OC)cc1OC
B1856	OCOc1cccc(OCO*)c1
B1857	OCC(=O)CCCC(=O)CO*
B1858	OC(C(=O)C)CC(O*)C(=O)C
B1859	OCCOC(OCCO*)c1occc1
B1860	OCC1(CO*)Cc2ccccc2CC1
B1861	OC=CCCCCCCCCCCCCCCC=CO*
B1862	OC(=C)CCCCCCCCCCCCCCC(O*)=C
B1863	OC(C=C)CCCCCCCCCCCCC(O*)C=C
B1864	OC(CC=C)CCCCCCCCCCC(O*)CC=C
B1865	OC(CCC=C)CCCCCCCCC(O*)CCC=C
B1866	OC(CCCC=C)CCCCCCC(O*)CCCC=C
B1867	OCN1C(=O)N(CO*)C(=O)C(C)(C)C1=O
B1868	OCC1(CO*)C(=O)N(C)C(=O)N(C)C1=O
B1869	OC(OP(=S)(Oc1nc2ccccc2nc1)OC(O*)C)C
B1870	OCCOP(=S)(Oc1nc2ccccc2nc1)OCCO*
B1871	Oc1ccc2cc3cc4cc5cc(O*)ccc5cc4cc3cc2c1
B1872	Oc1ccc2cc3cc4cc5ccc(O*)cc5cc4cc3cc2c1
B1873	Oc1cccc2cc3cc4cc5c(O*)cccc5cc4cc3cc12
B1874	Oc1cccc2cc3cc4cc5cccc(O*)c5cc4cc3cc12
B1875	Oc1c2ccccc2cc2cc3cc4ccccc4c(O*)c3cc12
B1876	Oc1c2ccccc2cc2cc3c(O*)c4ccccc4cc3cc12
B1877	Oc1cc(C)cc2c1Sc1cc(C)cc(O*)c1S2
B1878	Oc1cc2c(cc1C)Sc1cc(O*)c(C)cc1S2
B1879	OCc1ccc2c(c1)Sc1ccc(CO*)cc1S2
B1880	Oc1c2c(ccc1C)Sc1c(O*)c(C)ccc1S2
B1881	Oc1ccc2c(c1)Oc1cc(O*)ccc1N2
B1882	Oc1ccc2c(c1)Nc1cc(O*)ccc1O2
B1883	Oc1cccc2c1Nc1c(O*)cccc1O2
B1884	Oc1cccc2c1Oc1c(O*)cccc1N2
B1885	Oc1ccc(-c2ccc(-c3ccc(-c4ccc(O*)cc4)cc3)cc2)cc1
B1886	Oc1cc(-c2ccc(-c3ccccc3)c(O*)c2)ccc1-c1ccccc1
B1887	Oc1ccccc1-c1ccc(-c2ccc(-c3ccccc3O*)cc2)cc1
B1888	Oc1cccc(-c2ccc(-c3ccc(-c4cccc(O*)c4)cc3)cc2)c1
B1889	Oc1cc(Cc2ccc(N(CC)CC)c(O*)c2)ccc1N(CC)CC
B1890	OC(N(c1ccc(Cc2ccc(N(CC)C(O*)C)cc2)cc1)CC)C
B1891	OCCN(c1ccc(Cc2ccc(N(CC)CCO*)cc2)cc1)CC
B1892	Oc1ccc(C(c2ccccc2)(c2ccc(O*)cc2)CCCC)cc1
B1893	Oc1cccc(C(c2ccccc2)(c2cccc(O*)c2)CCCC)c1
B1894	Oc1ccccc1C(c1ccccc1)(c1ccccc1O*)CCCC
B1895	OCC(C=C=C)CO*
B1896	OCC(C)(CO*)CC
B1897	Oc1cc(O*)c(C)c(C)c1C
B1898	OCc1cccc(CO*)c1C
B1899	Oc1ccccc1CC=CCc1ccccc1O*
B1900	Oc1cccc(CC=CCc2cccc(O*)c2)c1
B1901	Oc1ccc(CC=CCc2ccc(O*)cc2)cc1
B1902	OC1=CC(=O)N(c2ccc(Cc3ccc(N4C(=O)C=C(O*)C4=O)cc3)cc2)C1=O
B1903	Oc1cc(Cc2ccc(N3C(=O)C=CC3=O)c(O*)c2)ccc1N1C(=O)C=CC1=O
B1904	OC=CCCCCCCCC=CO*
B1905	OC(=C)CCCCCCCC(O*)=C
B1906	OC(C=C)CCCCCC(O*)C=C
B1907	OC(CC=C)CCCC(O*)CC=C
B1908	OC(CCC)CC(c1cc(C)cc(C(C)(C)CC(O*)CCC)c1)(C)C
B1909	OC(CC)CCC(c1cc(C)cc(C(C)(C)CCC(O*)CC)c1)(C)C
B1910	OC(C)CCCC(c1cc(C)cc(C(C)(C)CCCC(O*)C)c1)(C)C
B1911	OCCCCCC(c1cc(C)cc(C(C)(C)CCCCCO*)c1)(C)C
B1912	OCC(c1cc(C)cc(C(C)(CO*)CCCCC)c1)(C)CCCCC
B1913	OC(CCCC)C(c1cc(C)cc(C(C)(C)C(O*)CCCC)c1)(C)C
B1914	OC1CCCCC(O*)C1CCC
B1915	OC1CCC(O*)CC(CCC)C1
B1916	OCC(CO*)CC(=O)C(=O)C
B1917	OCC(CO*)(CC)C(C(=C)C)C
B1918	OCc1ccc(CO*)c2cc(C)c(C)cc12
B1919	Oc1c(C)c(C)c(O*)c2c(C)ccc(C)c12
B1920	OCc1c(CO*)cc2c(C)ccc(C)c2c1
B1921	Oc1ccc(C(c2ccc(O*)cc2)C(C(=O)C)(C(=O)C)C)cc1
B1922	Oc1cccc(C(c2cccc(O*)c2)C(C(=O)C)(C(=O)C)C)c1
B1923	Oc1ccccc1C(c1ccccc1O*)C(C(=O)C)(C(=O)C)C
B1924	OCC(=O)C(C(=O)CO*)(C)C(c1ccccc1)c1ccccc1
B1925	OC1=C(C)C(=O)C(O*)=C(C)C1=O
B1926	OCC1=CC(=O)C(CO*)=CC1=O
B1927	OCCN(CC(=O)Nc1c(C)cccc1C)CCO*
B1928	OCc1cccc(CO*)c1NC(=O)CN(CC)CC
B1929	OC(C)CCC(Cc1cccc(CC(CC)CCC(O*)C)c1)CC
B1930	OCCCCC(Cc1cccc(CC(CC)CCCCO*)c1)CC
B1931	OC(Cc1cccc(CC(O*)(CC)CCCC)c1)(CC)CCCC
B1932	OC(C)C(Cc1cccc(CC(CCCC)C(O*)C)c1)CCCC
B1933	OCCC(Cc1cccc(CC(CCO*)CCCC)c1)CCCC
B1934	OC(CCC)C(Cc1cccc(CC(CC)C(O*)CCC)c1)CC
B1935	OC(CC)CC(Cc1cccc(CC(CC)CC(O*)CC)c1)CC
B1936	Oc1ccc(N(c2ccc(N(c3ccc(O*)cc3)c3ccc(C)cc3)cc2)c2ccc(C)cc2)cc1
B1937	Oc1ccccc1N(c1ccc(N(c2ccc(C)cc2)c2ccccc2O*)cc1)c1ccc(C)cc1
B1938	Oc1cccc(N(c2ccc(N(c3ccc(C)cc3)c3cccc(O*)c3)cc2)c2ccc(C)cc2)c1
B1939	Oc1cc(C)ccc1N(c1ccccc1)c1ccc(N(c2ccccc2)c2ccc(C)cc2O*)cc1
B1940	Oc1cc(N(c2ccccc2)c2ccc(N(c3ccccc3)c3ccc(C)c(O*)c3)cc2)ccc1C
B1941	OCc1ccc(N(c2ccccc2)c2ccc(N(c3ccccc3)c3ccc(CO*)cc3)cc2)cc1
B1942	OCOC(OCO*)(C)CCCC
B1943	OCC(CO*)C1C=C(C)CC1
B1944	OCC(=C1CCCC(C)C1)CO*
B1945	Oc1ccc(C(c2ccc(O*)cc2)C2N(CC)CCCC2)cc1
B1946	Oc1cccc(C(c2cccc(O*)c2)C2N(CC)CCCC2)c1
B1947	Oc1ccccc1C(c1ccccc1O*)C1N(CC)CCCC1
B1948	OCc1cc(C)cc(CO*)c1C(C)CCC
B1949	OCCN(CCO*)C(C)CC(=O)Nc1ccccc1
B1950	OCC12CCCCC1(CO*)CCCC2
B1951	OC1CCCC2(C)CCCC(O*)C12C
B1952	OC1CCC(O*)C2(C)CCCCC12C
B1953	OC1CCCC2(C)C(O*)CCCC12C
B1954	OC1CCC2(C)CCC(O*)CC2(C)C1
B1955	ON(c1ncnc(N(O*)C(C)C)n1)C(C)C
B1956	OC(Nc1ncnc(NC(O*)(C)C)n1)(C)C
B1957	OCC(Nc1ncnc(NC(C)CO*)n1)C
B1958	Oc1cc(O*)cc(C(=O)N(C)C)c1
B1959	Oc1cccc(O*)c1C(=O)N(C)C
B1960	OCN(C(=O)c1ccccc1)CO*
B1961	OCN(CO*)C(C)(C)C
B1962	OCC(N(C)C)(C)CO*
B1963	OCC(CO*)C1CC=CCC1
B1964	OCC1(CO*)CC=CCC1
B1965	OCC(C)(CO*)C1C=CCCC1
B1966	OCC(C)(CO*)S(=O)(=O)C
B1967	Oc1ccc(NNC(=O)NNc2ccc(O*)cc2)cc1
B1968	Oc1ccccc1NNC(=O)NNc1ccccc1O*
B1969	Oc1cccc(NNC(=O)NNc2cccc(O*)c2)c1
B1970	ON(c1ccccc1)NC(=O)NN(O*)c1ccccc1
B1971	Oc1ccc(CCCCCCCCCCc2ccc(O*)cc2)cc1
B1972	Oc1ccccc1CCCCCCCCCCc1ccccc1O*
B1973	Oc1cccc(CCCCCCCCCCc2cccc(O*)c2)c1
B1974	OC(c1ccccc1)CCCCCCCCC(O*)c1ccccc1
B1975	OC(Cc1ccccc1)CCCCCCC(O*)Cc1ccccc1
B1976	Oc1ccc(CNCCNCc2ccc(O*)cc2)cc1
B1977	Oc1ccccc1CNCCNCc1ccccc1O*
B1978	Oc1cccc(CNCCNCc2cccc(O*)c2)c1
B1979	OC(c1ccccc1)NCCNC(O*)c1ccccc1
B1980	Oc1cc(O*)cc(CC#N)c1
B1981	Oc1cccc(O*)c1CC#N
B1982	OCCN(CCO*)CCCCC
B1983	ON(C(=O)N(O*)C)C
B1984	OCNC(=O)NCO*
B1985	OCC(C)(C)CC(C)CCc1ccccc1CCC(C)CC(C)(C)CO*
B1986	OC(Cc1ccccc1CC(O*)C(C)CC(C)(C)C)C(C)CC(C)(C)C
B1987	OC(C)(CCc1ccccc1CCC(O*)(C)CC(C)(C)C)CC(C)(C)C
B1988	OCC(CCc1ccccc1CCC(CO*)CC(C)(C)C)CC(C)(C)C
B1989	OC(C(C)CCc1ccccc1CCC(C)C(O*)C(C)(C)C)C(C)(C)C
B1990	OCc1ccc(CO*)c2c1CCCC2
B1991	OC1c2c(C)ccc(C)c2C(O*)CC1
B1992	Oc1ccc(N(c2ccccc2)c2ccc(N(c3ccccc3)c3ccc(O*)cc3)cc2)cc1
B1993	Oc1ccc(N(c2ccc(O*)cc2)c2ccc(N(c3ccccc3)c3ccccc3)cc2)cc1
B1994	Oc1cccc(N(c2ccccc2)c2ccc(N(c3ccccc3)c3cccc(O*)c3)cc2)c1
B1995	Oc1cccc(N(c2ccc(N(c3ccccc3)c3ccccc3)cc2)c2cccc(O*)c2)c1
B1996	Oc1ccccc1N(c1ccccc1)c1ccc(N(c2ccccc2)c2ccccc2O*)cc1
B1997	Oc1ccccc1N(c1ccc(N(c2ccccc2)c2ccccc2)cc1)c1ccccc1O*
B1998	OCCCCOCCCCO*
B1999	OC(C)CCOCCC(O*)C
[truncated: 7,984 more rows]

## Sheet: Sheet S3
Polyester ID	Predicted Tg (℃)	MD simulated Tg (℃)
A30_B4164	155.01	130.95
A79_B1109	-0.43	-19.16
A79_B1515	59.16	69.45
A294_B1109	-53.41	-42.8
A294_B1515	-15.38	-6.69
A469_B5652	-25.9	-2.1
A515_B858	38.53	76.61
A515_B9983	120.96	114.01
A557_B858	-30.77	-11.31
A557_B1109	-46.39	-35.75
A557_B1515	34.4	69.6
A557_B9983	57.99	34.95
A637_B2727	108.52	103.56
A637_B7294	115.37	117.46
A1199_B5938	-58.7	-19.76
A1523_B609	169.96	171.34
A1523_B6944	174.78	189.06
A2390_B6483	-73.38	-37.51
A10614_B609	61.98	68.24

## Sheet: Sheet S4
Polyester ID	Predicted Tg (℃)	MD simulated Tg (℃)	Experimental Tg (℃)
A294_B1515	-15.38	-6.69	-10.61
A515_B858	38.53	76.61	42.36
A515_B9983	120.96	114.01	125.84
A557_B858	-30.77	-11.31	-9.18
A557_B1109	-46.39	-35.75	-23.27
A557_B1515	34.4	69.6	32.11
A557_B9983	57.99	34.95	22.92
A10614_B609	61.98	68.24	25.96
